# Supplementary material for: Metabolic homeostasis is maintained in myocardial hibernation by adaptive changes in the transcriptome and proteome
Source: PubMed Central journal article supplement — J Mol Cell Cardiol. 2011 Jun;50(6):982–90. doi: 10.1016/j.yjmcc.2011.02.010 (PMC3107937; doi:10.1016/j.yjmcc.2011.02.010), 2011-06

## **SUPPLEMENTAL MATERIAL**

### **METABOLIC HOMEOSTASIS IS MAINTAINED**

### **IN MYOCARDIAL HIBERNATION**

### **BY ADAPTIVE CHANGES IN THE TRANSCRIPTOME AND PROTEOME**

Manuel Mayr<sup>1</sup>, Dalit May<sup>2</sup>, Oren Gordon<sup>2</sup>, Basetti Madhu<sup>3</sup>, Dan Gilon<sup>4</sup>, Xiaoke Yin<sup>1</sup>,

Qiuru Xing<sup>1</sup>, Ignat Drozdov<sup>5</sup>, Chrysanthi Ainali<sup>5</sup>, Sophia Tsoka<sup>5</sup>, Qingbo Xu<sup>1</sup>,

John Griffiths<sup>3</sup>, Anton Horrevoets<sup>6</sup>, Eli Keshet<sup>2</sup>

<sup>1</sup> King's British Heart Foundation Centre, King's College London, London, UK

<sup>2</sup> Molecular Biology, The Hebrew University-Hadassah University Hospital,  
Jerusalem, Israel

<sup>3</sup> Cancer Research UK, Cambridge Research Institute, Cambridge, UK

<sup>4</sup> Cardiology Department, Hadassah-Hebrew University Medical Center

<sup>5</sup> Centre for Bioinformatics - School of Physical Sciences and Engineering, King's  
College London, London, UK

<sup>6</sup> Molecular Cell Biology and Immunology, VU University Medical Center,  
Amsterdam, The Netherlands

#### **Correspondence to:**

Dr. Manuel Mayr, Cardiovascular Division, King's College London

125 Coldharbour Lane, London SE5 9NU, UK

Phone: +44 (0) 20 7848 5238

Fax: +44 (0) 20 7848 5296

Email: [manuel.mayr@kcl.ac.uk](mailto:manuel.mayr@kcl.ac.uk)

## SUPPLEMENTAL MATERIAL AND METHODS

**Hypoxyprobe™ staining.** Hypoxyprobe™ (pimonidazole hydrochloride [1]) staining was performed according to the manufacturer's instruction (60 mg/kg body, Chemicon). Hypoxic cells activate pimonidazole hydrochloride and bind 2-nitroimidazole compounds. Oxygen competes for the addition of the first electron to Hypoxyprobe™, and it is believed that this competition accounts for the oxygen dependence of 2-nitroimidazole reductive activation and binding. The second part of the assay includes a primary antibody reagent that recognizes Hypoxyprobe™ adducts in hypoxic cells. To minimise non-specific background staining, a primary fluorescein (FITC)-conjugated mouse monoclonal antibody directed against pimonidazole protein adducts was used in combination with a secondary mouse anti-FITC Mab conjugated to horseradish peroxidase (HRP) as previously reported [2].

**Real-time PCR (qPCR).** For qPCR analysis, cDNA was generated from 5 mg of total RNA by using Verso cDNA kit (Thermo scientific) and the respective primers. Samples were normalized according to L19 mRNA levels by SYBR green qPCR. The primer sequences were as follows: for Kir6.2 F-TCTCCATCGAGGTCCAGGTG, R-CCCGACGATATTCTGCACAAT; for SUR2A F-TCTGCATCGGGTTCACACC, R-CCTGGGCCAAGAGGCTTT; for GLUT1 F-CTTTGGTCTCTCTCCGTGGC, R- AGCATGGAGTTCCGCCTG; for FOXO1 F-AATGATGGGCCCTAATTCGG, R- GCTGTGCATGTCCAGGGTG.

**Difference in-gel electrophoresis (DIGE).** Protein extracts were prepared from homogenized hearts using a standard lysis buffer (9M urea, 1% DTT, 4% CHAPS, 0.8% Pharmalytes 3-10, protease and phosphatase inhibitors (Complete Mini, Roche). After centrifugation at 13,000 g for 10 min, the supernatant containing soluble proteins was harvested and the protein concentration was determined using a

modification of the method described by Bradford. Solubilised samples were divided into aliquots and stored at  $-80^{\circ}\text{C}$ . For DIGE, proteins were precipitated (ReadyPrep 2-D Clean-up kit, Biorad) and resuspended in DIGE buffer (30mM TrisCl pH 8.5, 8M urea, 4% w/v CHAPS). The fluorescence dye labelling reaction was carried out at a dye/protein ratio of 400 pmol/100 $\mu\text{g}$ . After incubation on ice for 30 min, the labelling reaction was stopped by scavenging non-bound dyes with 10mM lysine for 15 min. For two-dimensional gel electrophoresis (2-DE), extracts were loaded on nonlinear immobilized pH gradient 18-cm strips, 3-10 (GE healthcare). In addition to using a wide-range pH gradient, we separated cardiac proteins on a pH 4 to 7 gradient to increase spatial resolution for phosphoprotein staining. 100  $\mu\text{g}$  per sample was applied to the IPG strip using an in-gel rehydration method. Samples were diluted in rehydration solution (8 M urea, 0.5% w/v CHAPS, 0.2% w/v DTT, and 0.2 % w/v Pharmalyte pH 3-10) and rehydrated overnight in a reswelling tray. Strips were focused at 0.05 mA/IPG strip for 35 kVh at  $20^{\circ}\text{C}$  (IPGphor, GE healthcare). Once IEF was completed the strips were equilibrated in 6M urea containing 30% v/v glycerol, 2% w/v SDS and 0.01% w/v Bromphenol blue, with addition of 1% w/v DTT for 15 min, followed by the same buffer without DTT, but with the addition of 4.8% w/v iodoacetamide for 15 min. SDS-PAGE was performed using 12% T (total acrylamide concentration), 2.6% C (degree of cross-linking) polyacrylamide gels without a stacking gel, using the Ettan DALT system (GE healthcare). The second dimension was terminated when the Bromphenol dye front had migrated off the lower end to the gels. After electrophoresis, fluorescence images were acquired using the Typhoon variable mode imager 9400 (GE healthcare). A pre-scan was performed to optimize the scanning parameters to exclude spot saturation. Differences in protein expression were analyzed using the Decyder software (version 6.5, GE healthcare).

Corrections for multiple testing were performed by the Benjamini-Hochberg equation, yielding False Discovery rates (FDR)[3]. Finally, gels were fixed overnight in methanol: acetic acid: water solution (4:1:5 v/v/v). Protein profiles were visualised by silver staining using the Plus one silver staining kit (GE healthcare) with slight modifications to ensure compatibility with subsequent mass spectrometry analysis [4]. For documentation, silver-stained gels were scanned in transmission scan mode using a calibrated scanner (GS-800, Biorad).

**Principal Component Analysis (PCA).** For proteomics, DIGE gels were analysed using the EDA module of the Decyder software (version 6.5, GE healthcare). Principal component analysis (PCA) was performed on all differentially expressed proteins after removal of missing values to give an initial overview of the groupings. PCA replaces a group of variables with a smaller number of new variables, called principal components (PC), which are linear combinations of the original variables. Projecting the observation on one of these axes generates a new variable designed to maximize the description of the variance in the data set. For pattern analysis, hierarchical clustering was performed on the Student's T-test<0.05 dataset.

**LC-MS/MS.** Gel pieces containing selected protein spots were treated overnight with modified trypsin (Promega) according to a published protocol modified for use with an Investigator ProGest (Genomic Solutions, Huntington, UK) robotic digestion system [5]. Following enzymatic degradation, peptides were separated by a Surveyor HPLC system on a reverse-phase column and applied online to a LCQ deca XP ion-trap mass spectrometer. Spectra were collected from the ion-trap mass analyzer using full ion scan mode over the mass-to-charge ( $m/z$ ) range 300-2000. MS-MS scans were performed on each ion using dynamic exclusion. Spectra were searched against a mouse database (UniProt 15.13, 16214 entries) using the

SEQUEST algorithm incorporated in the Bioworks Browser 3.3.1 SP1 (Thermo Fisher Scientific). The following criteria were used: 1.5 AMU for the precursor ion, 1.0 AMU for fragment ions, one missed cleavage per peptide. Carbamidomethylation of cysteine as well as partial oxidation of methionine were assumed. Search results were imported into Scaffold (v2.06.00, Proteome Software). The following filter were applied: 99.0% protein probability, 95% peptide probability, a minimum of 2 peptides.

**Immunoblotting.** 50  $\mu$ g of protein extracts were separated on 4-20% gradient gels (Novex, Invitrogen) and transferred to nitrocellulose membranes. Membranes were blocked in 5% PBS milk and probed with the following antibodies: lactate dehydrogenase (ab7639-1, 1:100, Abcam), glucose transporter 1 (GLUT-1, GT11-A, Alpha Diagnostics Intl.), IGFBP-2 (AF797, 0.1  $\mu$ g/ml, R&D), peroxiredoxin 1 (LF-PA0001, 1:2000, Lab Frontier), peroxiredoxin 2 (LF-PA0007, 1:2000, Lab Frontier), SOD-1 (sc-11407, 1:100, Santa Cruz), and SOD-2 (06-984, 1:500, Upstate). After incubation with HRP-conjugated secondary antibodies and washing 3 times for 5 minutes each in 0.5% PBS tween, bands were detected on X-ray films using enhanced chemiluminescence (ECL, GE healthcare).

**Phosphate-affinity gel electrophoresis (Phos-tag<sup>TM</sup>).** For phosphate-affinity gel electrophoresis, 50  $\mu$ g of protein extracts were separated on 10% polyacrylamide gels containing 50  $\mu$ M Phos-tag<sup>TM</sup> (Wako Chemicals GmbH) and 50  $\mu$ M MnCl<sub>2</sub> (Sigma). Gels were soaked in transfer buffer with 1mM EDTA for 10 min, then in transfer buffer for another 10 min prior to blotting onto a polyvinylidene fluoride (PVDF) membrane. Membranes were probed with antibodies to myosin light chain 2 (Abcam 89594) and cardiac troponin I (Cell Signaling Technology #4002).

**Proton nuclear magnetic resonance spectroscopy (<sup>1</sup>H-NMR).** Frozen heart

tissues were ground under liquid nitrogen using a mortar and pestle (n=5 and n=3 for hibernating and control hearts, respectively). Water-soluble metabolites were extracted in 6% perchloric acid. Deproteinised extracts were transferred to ice cold centrifuge tubes and centrifuged at 3000 rpm for 10 minutes at 4°C. The supernatant was transferred to fresh cold centrifuge tubes and neutralised to pH 7 with 10M KOH. After neutralization, extracts were centrifuged, the supernatant was collected, freeze-dried and reconstituted in deuterium oxide (D<sub>2</sub>O). Immediately before the NMR analysis[6], the pH was readjusted to 7 with PCA or KOH. 0.5ml of the extracts were placed in 5mm NMR tubes. <sup>1</sup>H-NMR was performed using a Bruker 600MHz spectrometer. The water resonance was suppressed by using gated irradiation centred on the water frequency. Sodium 3-trimethylsilyl-2,2,3,3-tetradeuteropropionate (TSP) was added to the samples for chemical shift calibration and quantification.

**Network construction and pathway analysis.** The previously published raw transcriptomics data [7] were first reanalyzed to correct for multiple testing[8]. This yielded a total of 166 induced and 195 repressed genes during hibernation at Bayesian  $p < 0.01$  and a FDR < 20%. The original 8 .cel files were uploaded into the Bioconductor R-package ([www.bioconductor.org](http://www.bioconductor.org)), 2 chips that did not pass QC were discarded, and the remaining 6 were normalized by the MAS5 module. Expression differences of the log<sub>2</sub> normalized data were next statistically analyzed by a moderated t-test for micro-array data (Cyber-T) [9] and corrected for multiple testing by the Benjamini-Hochberg equation, yielding False Discovery rates (FDR) [3]. The network construction was based on the available normalized raw expression values of 1174 probes. Using a cutoff of  $\pm 2$  fold change, we reduced this set to 397 differentially expressed probes. In cases where more than one probe mapped to the same gene, these probes were averaged, the average expression level was retained and

so the dataset was reduced to 315 unique genes. The “mcxarray” program from MCL clustering package[10] was used to construct the network from expression data. Pairwise similarities in gene expression vectors were expressed through the Pearson correlation coefficient (PCC) and a threshold of  $PCC > 0.7$  was used to link correlated genes. The resulting network representation of the gene expression experiment included proteins as nodes, edges linked correlated proteins and visualisation was performed with the Cytoscape software[11]. Transcriptomics, proteomics and metabolomics data were analysed by the MetaCore™ systems biology analysis suite version 5.1 (GeneGo Inc., St. Joseph, MI), using a filtering criterion of  $p < 0.05$  ([www.genego.com](http://www.genego.com)).

**Statistical analysis.** Statistical analysis was performed using the analysis of variance and Student’s t-test. The Kruskal-Wallis test with the Dunn’s post test was used as a nonparametric test. Pairwise comparisons between metabolites were performed using the Bonferroni / Dunn test. Results were given as means±SE. A P value  $< 0.05$  was considered significant.

## References

- [1] Varghese AJ, Gulyas S, Mohindra JK. Hypoxia-dependent reduction of 1-(2-nitro-1-imidazolyl)-3-methoxy-2-propanol by Chinese hamster ovary cells and KHT tumor cells in vitro and in vivo. *Cancer Res.* 1976 Oct; 36(10): 3761-5.
- [2] Samoszuk MK, Walter J, Mechetner E. Improved immunohistochemical method for detecting hypoxia gradients in mouse tissues and tumors. *J Histochem Cytochem.* 2004 Jun; 52(6): 837-9.
- [3] Benjamini Y, Hochberg Y. Controlling the false discovery rate: a practical and powerful approach to multiple testing. *J R Statistic Soc.* 1995; 57(1): 289-300.
- [4] Yan JX, Wait R, Berkelman T, Harry RA, Westbrook JA, Wheeler CH, et al. A modified silver staining protocol for visualization of proteins compatible with matrix-assisted laser desorption/ionization and electrospray ionization-mass spectrometry. *Electrophoresis.* 2000 Nov; 21(17): 3666-72.
- [5] Shevchenko A, Wilm M, Vorm O, Mann M. Mass spectrometric sequencing of proteins silver-stained polyacrylamide gels. *Anal Chem.* 1996 Mar 1; 68(5): 850-8.
- [6] Bergmeyer H. *Methods of enzymatic analysis.* Weinheim, Germany: Verlag Chemie; 1974.
- [7] May D, Gilon D, Djonov V, Itin A, Lazarus A, Gordon O, et al. Transgenic system for conditional induction and rescue of chronic myocardial hibernation provides insights into genomic programs of hibernation. *Proc Natl Acad Sci U S A.* 2008 Jan 8; 105(1): 282-7.
- [8] Schirmer SH, Fledderus JO, Bot PT, Moerland PD, Hoefler IE, Baan J, Jr., et al. Interferon-beta signaling is enhanced in patients with insufficient coronary collateral artery development and inhibits arteriogenesis in mice. *Circ Res.* 2008 May 23; 102(10): 1286-94.
- [9] Baldi P, Long AD. A Bayesian framework for the analysis of microarray expression data: regularized t -test and statistical inferences of gene changes. *Bioinformatics.* 2001 Jun; 17(6): 509-19.
- [10] Enright AJ, Van Dongen S, Ouzounis CA. An efficient algorithm for large-scale detection of protein families. *Nucleic Acids Res.* 2002 Apr 1; 30(7): 1575-84.
- [11] Shannon P, Markiel A, Ozier O, Baliga NS, Wang JT, Ramage D, et al. Cytoscape: a software environment for integrated models of biomolecular interaction networks. *Genome Res.* 2003 Nov; 13(11): 2498-504.



## SUPPLEMENTAL FIGURES

**Supplemental Figure 1. PCA and heat map.** (A) PCA for multivariate analysis of proteome dynamics in hibernating (red) compared to control (blue) hearts. The black ellipse represents the 95% significance level. Principal component 1 and 2 (PC1 and PC2) clearly separate the control and hibernating hearts based on their protein expression profiles. (B) Heat map. Hierarchical clustering was applied to rearrange the dataset. X- axis, spot maps; Y-axis, proteins. Red color denotes increase, green color denotes decrease. Black color indicates no change. More proteins are upregulated than downregulated during hibernation indicating a switch in gene and protein expression. Bar shows the log standard abundance value interval for the colors, +/- 0.3.

**Supplemental Figure 2. Changes in the proteome of hibernating hearts.** The user interface of the Decyder 2D software (version 6.5, GE healthcare) displays the experimental design view for “triose phosphate isomerase” (spot no 42, Table 1) and “creatine kinase” (B, spot no 27, Table 1). Note the consistency of the differential expression in the hibernating myocardium.

**Supplemental Figure 3. Densitometry.** Quantitative data for the phosphorylated bands of MLC-2 and TnI (highlighted with arrows in **Figures 4B and C**) as well as for SOD-2. \*, denotes a significant difference,  $p < 0.05$  (n=4 per group)

**Supplemental Figure 4. Pathway analysis.** The combined map (thermometer 1 is proteomics, 2 is transcriptomics, the red color indicates an upregulation in the

comparison hibernation vs control) revealed that protein changes were in the same pathway as transcriptomic changes and both datasets contributed the same number of focus molecules to the pathway analysis: Whereas proteomics identified 4 members of this pathway CCT6A (+1.25), HSPA5 (+2.18), TF (+1.32) and ALDOA (+1.52), transcriptomics identified 4 additional focus objects: EGLN3 (+6.91), BNIP (+3.2), SLC2A1 (+3.46) and VEGFA (+2.9).

Supplemental Table 1: Peptides identified by LC-MS/MS

| No. | Protein Name                     | Accession No. | Mw    | Protein id | Numbe | Numbe | Numbe | Sequence | Peptide sequence      | Best Pepti | Best SEQ | Best SEQ | Best XI | Numbe | Numb | Numb | Numl | Calculated + | Start | Stop |
|-----|----------------------------------|---------------|-------|------------|-------|-------|-------|----------|-----------------------|------------|----------|----------|---------|-------|------|------|------|--------------|-------|------|
| 1   | 78 kDa glucose-regulated protein | GRP78_MOUSE   | 72406 | 100.00%    | 21    | 21    | 51    | 33.70%   | VEIIANDQGGR           | 95.00%     | 3.19     | 0.365    | 2       | 0     | 7    | 0    | 2    | 1,228.63     | 51    | 61   |
| 1   | 78 kDa glucose-regulated protein | GRP78_MOUSE   | 72406 | 100.00%    | 21    | 21    | 51    | 33.70%   | ITPSYVFTPEGER         | 95.00%     | 2.63     | 0.567    | 3.92    | 0     | 4    | 0    | 2    | 1,566.78     | 62    | 75   |
| 1   | 78 kDa glucose-regulated protein | GRP78_MOUSE   | 72406 | 100.00%    | 21    | 21    | 51    | 33.70%   | NQLTSPNPVTFDAK        | 95.00%     | 3.82     | 0.599    | 4.4     | 0     | 4    | 0    | 2    | 1,677.81     | 83    | 97   |
| 1   | 78 kDa glucose-regulated protein | GRP78_MOUSE   | 72406 | 100.00%    | 21    | 21    | 51    | 33.70%   | TWNDRPSVQQDIK         | 95.00%     | 3.68     | 0.473    | 3.89    | 0     | 3    | 0    | 2    | 1,430.69     | 103   | 114  |
| 1   | 78 kDa glucose-regulated protein | GRP78_MOUSE   | 72406 | 100.00%    | 21    | 21    | 51    | 33.70%   | ETAEAYLGK             | 95.00%     | 1.8      | 0.341    | 0       | 0     | 4    | 0    | 2    | 981.4894     | 156   | 164  |
| 1   | 78 kDa glucose-regulated protein | GRP78_MOUSE   | 72406 | 100.00%    | 21    | 21    | 51    | 33.70%   | VTHAVVTPAYFNDAQR      | 95.00%     | 3.72     | 0.452    | 2.7     | 0     | 0    | 2    | 2    | 1,887.97     | 166   | 182  |
| 1   | 78 kDa glucose-regulated protein | GRP78_MOUSE   | 72406 | 100.00%    | 21    | 21    | 51    | 33.70%   | IINEPTAAIAYGLDK       | 95.00%     | 4.32     | 0.672    | 4.24    | 0     | 2    | 0    | 2    | 1,659.90     | 199   | 214  |
| 1   | 78 kDa glucose-regulated protein | GRP78_MOUSE   | 72406 | 100.00%    | 21    | 21    | 51    | 33.70%   | VLEDSDLK              | 95.00%     | 2.04     | 0.228    | 0       | 0     | 1    | 0    | 2    | 918.4786     | 346   | 353  |
| 1   | 78 kDa glucose-regulated protein | GRP78_MOUSE   | 72406 | 100.00%    | 21    | 21    | 51    | 33.70%   | VLEDSDLK              | 95.00%     | 1.91     | 0.348    | 1.24    | 0     | 2    | 0    | 2    | 1,046.57     | 346   | 354  |
| 1   | 78 kDa glucose-regulated protein | GRP78_MOUSE   | 72406 | 100.00%    | 21    | 21    | 51    | 33.70%   | KSDIDEIVLVGGSTR       | 95.00%     | 3        | 0.386    | 0       | 0     | 0    | 2    | 2    | 1,588.85     | 354   | 368  |
| 1   | 78 kDa glucose-regulated protein | GRP78_MOUSE   | 72406 | 100.00%    | 21    | 21    | 51    | 33.70%   | SDIDEIVLVGGSTR        | 95.00%     | 3.67     | 0.577    | 2.89    | 0     | 3    | 0    | 2    | 1,460.76     | 355   | 368  |
| 1   | 78 kDa glucose-regulated protein | GRP78_MOUSE   | 72406 | 100.00%    | 21    | 21    | 51    | 33.70%   | IQLLVK                | 95.00%     | 2.27     | 0.0929   | 0       | 0     | 1    | 0    | 2    | 728.4672     | 372   | 377  |
| 1   | 78 kDa glucose-regulated protein | GRP78_MOUSE   | 72406 | 100.00%    | 21    | 21    | 51    | 33.70%   | EFFNGKEPSR            | 95.00%     | 1.62     | 0.264    | 0       | 0     | 1    | 0    | 2    | 1,210.59     | 378   | 387  |
| 1   | 78 kDa glucose-regulated protein | GRP78_MOUSE   | 72406 | 100.00%    | 21    | 21    | 51    | 33.70%   | NTVVPTK               | 95.00%     | 1.66     | 0.304    | 0       | 0     | 1    | 0    | 2    | 758.4413     | 441   | 447  |
| 1   | 78 kDa glucose-regulated protein | GRP78_MOUSE   | 72406 | 100.00%    | 21    | 21    | 51    | 33.70%   | NTVVPTK               | 95.00%     | 1.9      | 0.312    | 0       | 0     | 1    | 0    | 2    | 886.5363     | 441   | 448  |
| 1   | 78 kDa glucose-regulated protein | GRP78_MOUSE   | 72406 | 100.00%    | 21    | 21    | 51    | 33.70%   | SQIFSTASDNQPTVTIK     | 95.00%     | 2.65     | 0.532    | 1.51    | 0     | 1    | 0    | 2    | 1,836.93     | 449   | 465  |
| 1   | 78 kDa glucose-regulated protein | GRP78_MOUSE   | 72406 | 100.00%    | 21    | 21    | 51    | 33.70%   | VYEGERPLTK            | 95.00%     | 2.43     | 0.438    | 0       | 0     | 2    | 0    | 2    | 1,191.64     | 466   | 475  |
| 1   | 78 kDa glucose-regulated protein | GRP78_MOUSE   | 72406 | 100.00%    | 21    | 21    | 51    | 33.70%   | ITITNDQNR             | 95.00%     | 2.9      | 0.378    | 1.68    | 0     | 3    | 0    | 2    | 1,074.55     | 525   | 533  |
| 1   | 78 kDa glucose-regulated protein | GRP78_MOUSE   | 72406 | 100.00%    | 21    | 21    | 51    | 33.70%   | NELESIYSLK            | 95.00%     | 3.46     | 0.409    | 1.14    | 0     | 2    | 0    | 2    | 1,316.64     | 564   | 574  |
| 1   | 78 kDa glucose-regulated protein | GRP78_MOUSE   | 72406 | 100.00%    | 21    | 21    | 51    | 33.70%   | ELEEIVQPIISK          | 95.00%     | 3.48     | 0.483    | 2.16    | 0     | 3    | 0    | 2    | 1,397.79     | 623   | 634  |
| 1   | 78 kDa glucose-regulated protein | GRP78_MOUSE   | 72406 | 100.00%    | 21    | 21    | 51    | 33.70%   | LVYGGPPPTGTEEDTSEKDEL | 95.00%     | 3.53     | 0.579    | 2.18    | 0     | 2    | 0    | 2    | 2,177.97     | 635   | 655  |
| 2   | Serotransferrin                  | TRFE_MOUSE    | 76706 | 100.00%    | 15    | 16    | 25    | 24.70%   | KTGDFQLNLEGK          | 95.00%     | 3.62     | 0.3      | 4.05    | 0     | 0    | 2    | 2    | 1,477.77     | 122   | 134  |
| 2   | Serotransferrin                  | TRFE_MOUSE    | 76706 | 100.00%    | 15    | 16    | 25    | 24.70%   | AVSFFSFGSCVPCADPVAFPK | 95.00%     | 2.83     | 0.568    | 4.57    | 0     | 2    | 0    | 2    | 2,230.03     | 168   | 188  |
| 2   | Serotransferrin                  | TRFE_MOUSE    | 76706 | 100.00%    | 15    | 16    | 25    | 24.70%   | CLKDGGDVAFVK          | 95.00%     | 2.31     | 0.191    | 0       | 0     | 0    | 1    | 2    | 1,365.68     | 213   | 225  |
| 2   | Serotransferrin                  | TRFE_MOUSE    | 76706 | 100.00%    | 15    | 16    | 25    | 24.70%   | DGGGVDVAFVK           | 95.00%     | 4.01     | 0.392    | 5.44    | 0     | 2    | 0    | 2    | 964.4742     | 216   | 225  |
| 2   | Serotransferrin                  | TRFE_MOUSE    | 76706 | 100.00%    | 15    | 16    | 25    | 24.70%   | DQYELLCLDNTR          | 95.00%     | 3.18     | 0.393    | 2.43    | 0     | 1    | 0    | 2    | 1,539.71     | 240   | 251  |
| 2   | Serotransferrin                  | TRFE_MOUSE    | 76706 | 100.00%    | 15    | 16    | 25    | 24.70%   | KPVQYEDCYLAR          | 95.00%     | 2.83     | 0.253    | 0       | 0     | 0    | 2    | 2    | 1,656.77     | 252   | 264  |
| 2   | Serotransferrin                  | TRFE_MOUSE    | 76706 | 100.00%    | 15    | 16    | 25    | 24.70%   | SKDFLSSPLGK           | 95.00%     | 2.69     | 0.136    | 3.89    | 0     | 0    | 1    | 2    | 1,453.77     | 298   | 310  |
| 2   | Serotransferrin                  | TRFE_MOUSE    | 76706 | 100.00%    | 15    | 16    | 25    | 24.70%   | DFQLFSSPLGK           | 95.00%     | 3.31     | 0.495    | 4.15    | 0     | 2    | 0    | 2    | 1,238.64     | 300   | 310  |
| 2   | Serotransferrin                  | TRFE_MOUSE    | 76706 | 100.00%    | 15    | 16    | 25    | 24.70%   | DSAFGLLR              | 95.00%     | 2.75     | 0.219    | 2.74    | 0     | 2    | 0    | 2    | 878.4737     | 316   | 323  |
| 2   | Serotransferrin                  | TRFE_MOUSE    | 76706 | 100.00%    | 15    | 16    | 25    | 24.70%   | LVLGHNYVTAIR          | 95.00%     | 2.2      | 0.475    | 3.47    | 0     | 1    | 2    | 2    | 1,419.77     | 332   | 343  |
| 2   | Serotransferrin                  | TRFE_MOUSE    | 76706 | 100.00%    | 15    | 16    | 25    | 24.70%   | NQQEGVCPEGSIDNSPVK    | 95.00%     | 3.44     | 0.583    | 9.2     | 0     | 2    | 0    | 2    | 1,957.89     | 344   | 361  |
| 2   | Serotransferrin                  | TRFE_MOUSE    | 76706 | 100.00%    | 15    | 16    | 25    | 24.70%   | GYAVAVVK              | 95.00%     | 3.43     | 0.525    | 4.57    | 0     | 1    | 0    | 2    | 969.5409     | 447   | 455  |
| 2   | Serotransferrin                  | TRFE_MOUSE    | 76706 | 100.00%    | 15    | 16    | 25    | 24.70%   | ASDTSITWNNLK          | 95.00%     | 2.86     | 0.416    | 4.7     | 0     | 2    | 0    | 2    | 1,349.67     | 456   | 467  |
| 2   | Serotransferrin                  | TRFE_MOUSE    | 76706 | 100.00%    | 15    | 16    | 25    | 24.70%   | CLVEKGDVAFVK          | 95.00%     | 2.81     | 0.366    | 5.15    | 0     | 0    | 1    | 2    | 1,364.72     | 543   | 554  |
| 2   | Serotransferrin                  | TRFE_MOUSE    | 76706 | 100.00%    | 15    | 16    | 25    | 24.70%   | NLKQDFELLCPDGR        | 95.00%     | 2.92     | 0.207    | 0       | 0     | 0    | 1    | 2    | 1,934.93     | 573   | 588  |
| 3   | Serotransferrin                  | TRFE_MOUSE    | 76706 | 100.00%    | 40    | 48    | 78    | 57.00%   | WCAVSEHENTK           | 95.00%     | 2.06     | 0.205    | 0       | 0     | 0    | 1    | 2    | 1,360.60     | 27    | 37   |
| 3   | Serotransferrin                  | TRFE_MOUSE    | 76706 | 100.00%    | 40    | 48    | 78    | 57.00%   | TSYDPCIK              | 95.00%     | 1.64     | 0.402    | 1.34    | 0     | 1    | 0    | 2    | 983.451      | 62    | 69   |
| 3   | Serotransferrin                  | TRFE_MOUSE    | 76706 | 100.00%    | 40    | 48    | 78    | 57.00%   | KTGDFQLNLEGK          | 95.00%     | 2.42     | 0.361    | 0       | 0     | 1    | 1    | 2    | 1,477.77     | 122   | 134  |
| 3   | Serotransferrin                  | TRFE_MOUSE    | 76706 | 100.00%    | 40    | 48    | 78    | 57.00%   | KTGDFQLNLEGK          | 95.00%     | 2.9      | 0.419    | 1.7     | 0     | 1    | 2    | 2    | 1,605.86     | 122   | 135  |
| 3   | Serotransferrin                  | TRFE_MOUSE    | 76706 | 100.00%    | 40    | 48    | 78    | 57.00%   | GTDQLNQLLEGK          | 95.00%     | 2.36     | 0.203    | 0       | 0     | 0    | 1    | 2    | 1,477.77     | 123   | 135  |
| 3   | Serotransferrin                  | TRFE_MOUSE    | 76706 | 100.00%    | 40    | 48    | 78    | 57.00%   | SAGWVPIGLLFC          | 95.00%     | 2.99     | 0.441    | 4.66    | 0     | 2    | 0    | 2    | 1,560.86     | 144   | 157  |
| 3   | Serotransferrin                  | TRFE_MOUSE    | 76706 | 100.00%    | 40    | 48    | 78    | 57.00%   | AVSFFSFGSCVPCADPVAFPK | 95.00%     | 4.06     | 0.615    | 3.57    | 0     | 2    | 0    | 2    | 2,230.03     | 168   | 188  |
| 3   | Serotransferrin                  | TRFE_MOUSE    | 76706 | 100.00%    | 40    | 48    | 78    | 57.00%   | CLKDGGDVAFVK          | 95.00%     | 4.21     | 0.426    | 2.72    | 0     | 2    | 2    | 2    | 1,365.68     | 213   | 225  |
| 3   | Serotransferrin                  | TRFE_MOUSE    | 76706 | 100.00%    | 40    | 48    | 78    | 57.00%   | DGGGVDVAFVK           | 95.00%     | 4.08     | 0.412    | 2.41    | 1     | 3    | 0    | 2    | 964.4742     | 216   | 225  |
| 3   | Serotransferrin                  | TRFE_MOUSE    | 76706 | 100.00%    | 40    | 48    | 78    | 57.00%   | GDVAFVK               | 95.00%     | 2.01     | 0.326    | 1.7     | 0     | 2    | 0    | 1    | 735.4042     | 219   | 225  |
| 3   | Serotransferrin                  | TRFE_MOUSE    | 76706 | 100.00%    | 40    | 48    | 78    | 57.00%   | HTTIFVELPEK           | 95.00%     | 3.78     | 0.493    | 4.92    | 0     | 2    | 0    | 2    | 1,313.71     | 226   | 236  |
| 3   | Serotransferrin                  | TRFE_MOUSE    | 76706 | 100.00%    | 40    | 48    | 78    | 57.00%   | HTTIFVELPEKADR        | 95.00%     | 3.22     | 0.445    | 3.74    | 0     | 0    | 2    | 2    | 1,655.88     | 226   | 239  |
| 3   | Serotransferrin                  | TRFE_MOUSE    | 76706 | 100.00%    | 40    | 48    | 78    | 57.00%   | ADRDQYELLCLDNTR       | 95.00%     | 3.96     | 0.272    | 1.7     | 0     | 0    | 1    | 2    | 1,881.88     | 237   | 251  |
| 3   | Serotransferrin                  | TRFE_MOUSE    | 76706 | 100.00%    | 40    | 48    | 78    | 57.00%   | DQYELLCLDNTR          | 95.00%     | 4.85     | 0.481    | 3.82    | 0     | 1    | 0    | 2    | 1,539.71     | 240   | 251  |
| 3   | Serotransferrin                  | TRFE_MOUSE    | 76706 | 100.00%    | 40    | 48    | 78    | 57.00%   | KPVQYEDCYLAR          | 95.00%     | 4.23     | 0.217    | 1.44    | 0     | 1    | 1    | 2    | 1,656.77     | 252   | 264  |
| 3   | Serotransferrin                  | TRFE_MOUSE    | 76706 | 100.00%    | 40    | 48    | 78    | 57.00%   | IPSHAVVK              | 95.00%     | 1.93     | 0.438    | 0       | 0     | 1    | 2    | 2    | 949.5583     | 265   | 273  |
| 3   | Serotransferrin                  | TRFE_MOUSE    | 76706 | 100.00%    | 40    | 48    | 78    | 57.00%   | KNNGKEDLIWEILK        | 95.00%     | 2.3      | 0.236    | 0       | 0     | 0    | 1    | 2    | 1,699.94     | 274   | 287  |
| 3   | Serotransferrin                  | TRFE_MOUSE    | 76706 | 100.00%    | 40    | 48    | 78    | 57.00%   | NNGKEDLIWEILK         | 95.00%     | 3.05     | 0.164    | 0       | 0     | 1    | 2    | 2    | 1,571.84     | 275   | 287  |
| 3   | Serotransferrin                  | TRFE_MOUSE    | 76706 | 100.00%    | 40    | 48    | 78    | 57.00%   | VAQEHFGK              | 95.00%     | 1.47     | 0.246    | 1.54    | 0     | 1    | 0    | 2    | 915.4689     | 288   | 295  |
| 3   | Serotransferrin                  | TRFE_MOUSE    | 76706 | 100.00%    | 40    | 48    | 78    | 57.00%   | SKDFLSSPLGK           | 95.00%     | 3.79     | 0.512    | 6.89    | 0     | 2    | 0    | 2    | 1,453.77     | 298   | 310  |
| 3   | Serotransferrin                  | TRFE_MOUSE    | 76706 | 100.00%    | 40    | 48    | 78    | 57.00%   | DFQLFSSPLGK           | 95.00%     | 3.71     | 0.436    | 1.96    | 0     | 1    | 0    | 2    | 1,238.64     | 300   | 310  |
| 3   | Serotransferrin                  | TRFE_MOUSE    | 76706 | 100.00%    | 40    | 48    | 78    | 57.00%   | DLLFKDSAFGLLR         | 95.00%     | 3.24     | 0.336    | 2.6     | 0     | 1    | 2    | 2    | 1,494.83     | 311   | 323  |
| 3   | Serotransferrin                  | TRFE_MOUSE    | 76706 | 100.00%    | 40    | 48    | 78    | 57.00%   | DSAFGLLR              | 95.00%     | 2.58     | 0.221    | 2.7     | 0     | 2    | 0    | 2    | 878.4737     | 316   | 323  |
| 3   | Serotransferrin                  | TRFE_MOUSE    | 76706 | 100.00%    | 40    | 48    | 78    | 57.00%   | LVLGHNYVTAIR          | 95.00%     | 3.28     | 0.518    | 2.24    | 0     | 3    | 2    | 2    | 1,419.77     | 332   | 343  |
| 3   | Serotransferrin                  | TRFE_MOUSE    | 76706 | 100.00%    | 40    | 48    | 78    | 57.00%   | NQQEGVCPEGSIDNSPVK    | 95.00%     | 3.92     | 0.539    | 5.29    | 0     | 2    | 0    | 2    | 1,957.89     | 344   | 361  |
| 3   | Serotransferrin                  | TRFE_MOUSE    | 76706 | 100.00%    | 40    | 48    | 78    | 57.00%   | WCALSHLR              | 95.00%     | 2.91     | 0.39     | 2.24    | 0     | 2    | 0    | 2    | 1,171.57     | 362   | 370  |
| 3   | Serotransferrin                  | TRFE_MOUSE    | 76706 | 100.00%    | 40    | 48    | 78    | 57.00%   | TKCDEWTSISEGK         | 95.00%     | 3.96     | 0.285    | 0       | 0     | 0    | 2    | 2    | 1,552.73     | 371   | 383  |
| 3   | Serotransferrin                  | TRFE_MOUSE    | 76706 | 100.00%    | 40    | 48    | 78    | 57.00%   | ICESAETTEDICIEK       | 95.00%     | 4.19     | 0.57     | 3.08    | 0     | 2    | 0    | 2    | 1,813.75     | 384   | 398  |
| 3   | Serotransferrin                  | TRFE_MOUSE    | 76706 | 100.00%    | 40    | 48    | 78    | 57.00%   | GYAVAVVK              | 95.00%     | 3.22     | 0.547    | 4.64    | 0     | 2    | 0    | 2    | 969.5409     | 447   | 455  |
| 3   | Serotransferrin                  | TRFE_MOUSE    | 76706 | 100.00%    | 40    | 48    | 78    | 57.00%   | ASDTSITWNNLK          | 95.00%     | 2.85     | 0.311    | 1.19    | 0     | 2    | 0    | 2    |              |       |      |

|   |                                                             |            |       |         |    |    |    |        |                        |        |      |          |       |   |   |   |   |          |     |     |
|---|-------------------------------------------------------------|------------|-------|---------|----|----|----|--------|------------------------|--------|------|----------|-------|---|---|---|---|----------|-----|-----|
| 3 | Serotransferrin                                             | TRFE_MOUSE | 76706 | 100.00% | 40 | 48 | 78 | 57.00% | AVLTSQETLFGGSDCTGNCLFK | 95.00% | 1.26 | 0.17     | 4.14  | 0 | 1 | 0 | 2 | 2,552.18 | 619 | 641 |
| 3 | Serotransferrin                                             | TRFE_MOUSE | 76706 | 100.00% | 40 | 48 | 78 | 57.00% | DLLFRDDTK              | 95.00% | 2.23 | 0.171    | 0     | 0 | 1 | 0 | 2 | 1,122.58 | 646 | 654 |
| 3 | Serotransferrin                                             | TRFE_MOUSE | 76706 | 100.00% | 40 | 48 | 78 | 57.00% | LPEGTTPKE              | 95.00% | 1.97 | 0.26     | 1.34  | 0 | 2 | 0 | 2 | 971.5052 | 659 | 667 |
| 3 | Serotransferrin                                             | TRFE_MOUSE | 76706 | 100.00% | 40 | 48 | 78 | 57.00% | LLEACTFHKH             | 95.00% | 2.55 | 0.486    | 0     | 0 | 2 | 0 | 2 | 1,255.63 | 688 | 697 |
| 4 | Serotransferrin                                             | TRFE_MOUSE | 76706 | 100.00% | 34 | 43 | 90 | 45.90% | TVLPPDGPR              | 95.00% | 1.46 | 0.281    | 3.25  | 0 | 1 | 0 | 2 | 951.5266 | 47  | 55  |
| 4 | Serotransferrin                                             | TRFE_MOUSE | 76706 | 100.00% | 34 | 43 | 90 | 45.90% | TSYPPDCIK              | 95.00% | 1.42 | 0.211    | 1.92  | 0 | 2 | 0 | 2 | 983.451  | 62  | 69  |
| 4 | Serotransferrin                                             | TRFE_MOUSE | 76706 | 100.00% | 34 | 43 | 90 | 45.90% | KGTFDQLNQLQEGK         | 95.00% | 2.65 | 0.388    | 3     | 0 | 2 | 2 | 2 | 1,477.77 | 122 | 134 |
| 4 | Serotransferrin                                             | TRFE_MOUSE | 76706 | 100.00% | 34 | 43 | 90 | 45.90% | KGTFDQLNQLQEGKK        | 95.00% | 2.97 | 0.394    | 1.03  | 0 | 0 | 2 | 2 | 1,605.86 | 122 | 135 |
| 4 | Serotransferrin                                             | TRFE_MOUSE | 76706 | 100.00% | 34 | 43 | 90 | 45.90% | DGGGDVAVFK             | 95.00% | 4.1  | 0.441    | 6.12  | 2 | 3 | 0 | 2 | 964.4742 | 216 | 225 |
| 4 | Serotransferrin                                             | TRFE_MOUSE | 76706 | 100.00% | 34 | 43 | 90 | 45.90% | GDVAVFK                | 95.00% | 2.37 | 0.283    | 2.66  | 2 | 1 | 0 | 1 | 735.4042 | 219 | 225 |
| 4 | Serotransferrin                                             | TRFE_MOUSE | 76706 | 100.00% | 34 | 43 | 90 | 45.90% | HTTIFVLPEK             | 95.00% | 3.12 | 0.553    | 4.8   | 0 | 3 | 0 | 2 | 1,313.71 | 226 | 236 |
| 4 | Serotransferrin                                             | TRFE_MOUSE | 76706 | 100.00% | 34 | 43 | 90 | 45.90% | ADRDOYELLCLDNTR        | 95.00% | 2.64 | 0.324    | 0     | 0 | 0 | 2 | 2 | 1,881.88 | 237 | 251 |
| 4 | Serotransferrin                                             | TRFE_MOUSE | 76706 | 100.00% | 34 | 43 | 90 | 45.90% | DQYELLCLDNTR           | 95.00% | 4.71 | 0.524    | 2.49  | 0 | 2 | 0 | 2 | 1,539.71 | 240 | 251 |
| 4 | Serotransferrin                                             | TRFE_MOUSE | 76706 | 100.00% | 34 | 43 | 90 | 45.90% | KPVVDQYEDCYLAR         | 95.00% | 4.06 | 0.534    | 1.47  | 0 | 1 | 3 | 2 | 1,656.77 | 252 | 264 |
| 4 | Serotransferrin                                             | TRFE_MOUSE | 76706 | 100.00% | 34 | 43 | 90 | 45.90% | IPSHAVVFK              | 95.00% | 1.48 | 0.515    | 2.32  | 0 | 2 | 1 | 2 | 949.5583 | 265 | 273 |
| 4 | Serotransferrin                                             | TRFE_MOUSE | 76706 | 100.00% | 34 | 43 | 90 | 45.90% | VAQEHFVK               | 95.00% | 1.61 | 0.39     | 1.72  | 0 | 3 | 0 | 2 | 915.4689 | 288 | 295 |
| 4 | Serotransferrin                                             | TRFE_MOUSE | 76706 | 100.00% | 34 | 43 | 90 | 45.90% | SKDFQLFSSPLGK          | 95.00% | 3.91 | 0.541    | 2.28  | 0 | 2 | 2 | 2 | 1,453.77 | 298 | 310 |
| 4 | Serotransferrin                                             | TRFE_MOUSE | 76706 | 100.00% | 34 | 43 | 90 | 45.90% | DFQLFSSPLGK            | 95.00% | 3.1  | 0.498    | 2.26  | 0 | 2 | 0 | 2 | 1,238.64 | 300 | 310 |
| 4 | Serotransferrin                                             | TRFE_MOUSE | 76706 | 100.00% | 34 | 43 | 90 | 45.90% | DSAFGLLR               | 95.00% | 2.84 | 0.262    | 2.29  | 0 | 4 | 0 | 2 | 878.4737 | 316 | 323 |
| 4 | Serotransferrin                                             | TRFE_MOUSE | 76706 | 100.00% | 34 | 43 | 90 | 45.90% | LYLGHNYVTAIR           | 95.00% | 3.01 | 0.551    | 3.74  | 0 | 1 | 4 | 2 | 1,419.77 | 332 | 343 |
| 4 | Serotransferrin                                             | TRFE_MOUSE | 76706 | 100.00% | 34 | 43 | 90 | 45.90% | NQEQGVCPGEGSIDNSPVK    | 95.00% | 4.59 | 0.504    | 4.96  | 0 | 3 | 0 | 2 | 1,957.89 | 344 | 361 |
| 4 | Serotransferrin                                             | TRFE_MOUSE | 76706 | 100.00% | 34 | 43 | 90 | 45.90% | TKCDEWIIISEGK          | 95.00% | 3.4  | 0.543    | 2.33  | 0 | 2 | 2 | 2 | 1,552.73 | 371 | 383 |
| 4 | Serotransferrin                                             | TRFE_MOUSE | 76706 | 100.00% | 34 | 43 | 90 | 45.90% | IECESAETTEDICEK        | 95.00% | 3.82 | 0.503    | 4.01  | 0 | 4 | 0 | 2 | 1,813.75 | 384 | 398 |
| 4 | Serotransferrin                                             | TRFE_MOUSE | 76706 | 100.00% | 34 | 43 | 90 | 45.90% | GYAVAVFK               | 95.00% | 3.28 | 0.504    | 4.59  | 1 | 3 | 0 | 2 | 969.5409 | 447 | 455 |
| 4 | Serotransferrin                                             | TRFE_MOUSE | 76706 | 100.00% | 34 | 43 | 90 | 45.90% | ASDTSITWNNLK           | 95.00% | 3.07 | 0.335    | 0     | 0 | 3 | 0 | 2 | 1,349.67 | 456 | 467 |
| 4 | Serotransferrin                                             | TRFE_MOUSE | 76706 | 100.00% | 34 | 43 | 90 | 45.90% | FDEFFSQGCAPGYEK        | 95.00% | 3.58 | 0.652    | 5.43  | 0 | 2 | 0 | 2 | 1,781.75 | 498 | 512 |
| 4 | Serotransferrin                                             | TRFE_MOUSE | 76706 | 100.00% | 34 | 43 | 90 | 45.90% | CAPNNKEEYNGYTGAFR      | 95.00% | 3.25 | 0.315    | 0     | 0 | 2 | 2 | 2 | 1,990.87 | 526 | 542 |
| 4 | Serotransferrin                                             | TRFE_MOUSE | 76706 | 100.00% | 34 | 43 | 90 | 45.90% | EYNGYTGAFR             | 95.00% | 2.4  | 0.491    | 2.08  | 0 | 2 | 0 | 2 | 1,306.57 | 532 | 542 |
| 4 | Serotransferrin                                             | TRFE_MOUSE | 76706 | 100.00% | 34 | 43 | 90 | 45.90% | CLVEKGDVAVFK           | 95.00% | 3.03 | 0.388    | 3.4   | 0 | 0 | 1 | 2 | 1,364.72 | 543 | 554 |
| 4 | Serotransferrin                                             | TRFE_MOUSE | 76706 | 100.00% | 34 | 43 | 90 | 45.90% | HQTVLDNTEGK            | 95.00% | 2.94 | 0.509    | 2.37  | 0 | 2 | 0 | 2 | 1,241.61 | 555 | 565 |
| 4 | Serotransferrin                                             | TRFE_MOUSE | 76706 | 100.00% | 34 | 43 | 90 | 45.90% | HQTVLDNTEGKNPAEWAK     | 95.00% | 3.47 | 0.568    | 2.89  | 0 | 0 | 2 | 2 | 2,038.00 | 555 | 572 |
| 4 | Serotransferrin                                             | TRFE_MOUSE | 76706 | 100.00% | 34 | 43 | 90 | 45.90% | NPAEWAK                | 95.00% | 1.53 | 0.335    | 1.57  | 0 | 1 | 0 | 2 | 815.4052 | 566 | 572 |
| 4 | Serotransferrin                                             | TRFE_MOUSE | 76706 | 100.00% | 34 | 43 | 90 | 45.90% | NLKQDFELLCPDGTGR       | 95.00% | 2.18 | 0.297    | 0.854 | 0 | 0 | 1 | 2 | 1,934.93 | 573 | 588 |
| 4 | Serotransferrin                                             | TRFE_MOUSE | 76706 | 100.00% | 34 | 43 | 90 | 45.90% | QEDFELLCPDGTGR         | 95.00% | 3.26 | 0.396    | 1.77  | 0 | 3 | 0 | 2 | 1,579.71 | 576 | 588 |
| 4 | Serotransferrin                                             | TRFE_MOUSE | 76706 | 100.00% | 34 | 43 | 90 | 45.90% | DFASCHLQAQPNHVVVSR     | 95.00% | 3.76 | 0.484    | 3.16  | 0 | 0 | 2 | 2 | 2,007.98 | 593 | 610 |
| 4 | Serotransferrin                                             | TRFE_MOUSE | 76706 | 100.00% | 34 | 43 | 90 | 45.90% | DLLFRDDTK              | 95.00% | 2.48 | 0.335    | 1.64  | 0 | 3 | 0 | 2 | 1,122.58 | 646 | 654 |
| 4 | Serotransferrin                                             | TRFE_MOUSE | 76706 | 100.00% | 34 | 43 | 90 | 45.90% | LPEGTTPKE              | 95.00% | 2.15 | 0.0879   | 2.74  | 0 | 1 | 0 | 2 | 971.5052 | 659 | 667 |
| 4 | Serotransferrin                                             | TRFE_MOUSE | 76706 | 100.00% | 34 | 43 | 90 | 45.90% | LLEACTFHKH             | 95.00% | 1.92 | 0.111    | 1.57  | 0 | 1 | 0 | 2 | 1,118.57 | 688 | 696 |
| 5 | Aconitate hydratase, mitochondrial                          | ACON_MOUSE | 85448 | 100.00% | 6  | 6  | 8  | 7.95%  | VAGILTVK               | 95.00% | 1.59 | 0.245    | 0     | 0 | 1 | 0 | 2 | 800.5247 | 251 | 258 |
| 5 | Aconitate hydratase, mitochondrial                          | ACON_MOUSE | 85448 | 100.00% | 6  | 6  | 8  | 7.95%  | SQFTITPQSEQIR          | 95.00% | 1.61 | 0.282    | 2.18  | 0 | 1 | 0 | 2 | 1,463.75 | 412 | 424 |
| 5 | Aconitate hydratase, mitochondrial                          | ACON_MOUSE | 85448 | 100.00% | 6  | 6  | 8  | 7.95%  | DGVAQILR               | 95.00% | 2.36 | 0.222    | 2.89  | 0 | 3 | 0 | 2 | 935.4952 | 430 | 437 |
| 5 | Aconitate hydratase, mitochondrial                          | ACON_MOUSE | 85448 | 100.00% | 6  | 6  | 8  | 7.95%  | NTIIVTSYNR             | 95.00% | 2.37 | 0.41     | 1.31  | 0 | 1 | 0 | 2 | 1,067.55 | 466 | 474 |
| 5 | Aconitate hydratase, mitochondrial                          | ACON_MOUSE | 85448 | 100.00% | 6  | 6  | 8  | 7.95%  | YDVSPITSQR             | 95.00% | 1.7  | 0.201    | 0.959 | 0 | 1 | 0 | 2 | 988.5064 | 556 | 564 |
| 5 | Aconitate hydratase, mitochondrial                          | ACON_MOUSE | 85448 | 100.00% | 6  | 6  | 8  | 7.95%  | NAVTOEQEFGVPDPTAR      | 95.00% | 3.3  | 0.498    | 4.47  | 0 | 1 | 0 | 2 | 1,601.79 | 634 | 648 |
| 6 | Cytoplasmic aconitate hydratase                             | ACOC_MOUSE | 98163 | 100.00% | 13 | 13 | 22 | 14.80% | LPFSIR                 | 95.00% | 1.64 | 0.236    | 0     | 0 | 1 | 0 | 2 | 732.4409 | 35  | 40  |
| 6 | Cytoplasmic aconitate hydratase                             | ACOC_MOUSE | 98163 | 100.00% | 13 | 13 | 22 | 14.80% | NCDEFLVK               | 95.00% | 1.91 | 0.0385   | 1.43  | 0 | 2 | 0 | 2 | 1,024.48 | 49  | 56  |
| 6 | Cytoplasmic aconitate hydratase                             | ACOC_MOUSE | 98163 | 100.00% | 13 | 13 | 22 | 14.80% | NIEVFPKPAR             | 95.00% | 1.21 | 0.187    | 2.28  | 0 | 1 | 0 | 2 | 1,170.66 | 73  | 82  |
| 6 | Cytoplasmic aconitate hydratase                             | ACOC_MOUSE | 98163 | 100.00% | 13 | 13 | 22 | 14.80% | NQDLEFER               | 95.00% | 2.49 | 0.141    | 2.47  | 0 | 2 | 0 | 2 | 1,050.69 | 142 | 149 |
| 6 | Cytoplasmic aconitate hydratase                             | ACOC_MOUSE | 98163 | 100.00% | 13 | 13 | 22 | 14.80% | DFESCLGAK              | 95.00% | 2.49 | 0.18     | 0     | 0 | 1 | 0 | 2 | 1,026.46 | 388 | 396 |
| 6 | Cytoplasmic aconitate hydratase                             | ACOC_MOUSE | 98163 | 100.00% | 13 | 13 | 22 | 14.80% | GFOVAPDR               | 95.00% | 1.78 | 0.253    | 1.44  | 0 | 2 | 0 | 2 | 889.4533 | 401 | 408 |
| 6 | Cytoplasmic aconitate hydratase                             | ACOC_MOUSE | 98163 | 100.00% | 13 | 13 | 22 | 14.80% | TSLSPGSGVTTYLR         | 95.00% | 3.87 | 0.531    | 5.03  | 0 | 2 | 0 | 2 | 1,599.84 | 469 | 483 |
| 6 | Cytoplasmic aconitate hydratase                             | ACOC_MOUSE | 98163 | 100.00% | 13 | 13 | 22 | 14.80% | IDFEKPLGVNAQGR         | 95.00% | 3.63 | 0.515    | 3.11  | 0 | 0 | 2 | 2 | 1,672.87 | 568 | 582 |
| 6 | Cytoplasmic aconitate hydratase                             | ACOC_MOUSE | 98163 | 100.00% | 13 | 13 | 22 | 14.80% | SWNALAAPSEK            | 95.00% | 2.65 | 0.366    | 1.41  | 0 | 2 | 0 | 2 | 1,173.59 | 622 | 632 |
| 6 | Cytoplasmic aconitate hydratase                             | ACOC_MOUSE | 98163 | 100.00% | 13 | 13 | 22 | 14.80% | LYAVNPK                | 95.00% | 1.58 | 0.202    | 0     | 0 | 2 | 0 | 2 | 891.4729 | 633 | 639 |
| 6 | Cytoplasmic aconitate hydratase                             | ACOC_MOUSE | 98163 | 100.00% | 13 | 13 | 22 | 14.80% | YQAGLPLVLVAGK          | 95.00% | 3.87 | 0.58     | 5.8   | 0 | 2 | 0 | 2 | 1,470.87 | 759 | 772 |
| 6 | Cytoplasmic aconitate hydratase                             | ACOC_MOUSE | 98163 | 100.00% | 13 | 13 | 22 | 14.80% | AVLAESYER              | 95.00% | 3.16 | 0.469    | 3.96  | 0 | 2 | 0 | 2 | 1,037.53 | 794 | 802 |
| 6 | Cytoplasmic aconitate hydratase                             | ACOC_MOUSE | 98163 | 100.00% | 13 | 13 | 22 | 14.80% | YTINIPEDLKPR           | 95.00% | 2.11 | 0.539    | 2.74  | 0 | 0 | 1 | 2 | 1,458.80 | 835 | 846 |
| 7 | Methylcrotonyl-CoA carboxylase subunit alpha, mitochondrial | MCCA_MOUSE | 79327 | 100.00% | 11 | 12 | 21 | 13.80% | IIQVAK                 | 95.00% | 1.68 | -0.00165 | 1.46  | 0 | 1 | 0 | 2 | 671.4457 | 109 | 114 |
| 7 | Methylcrotonyl-CoA carboxylase subunit alpha, mitochondrial | MCCA_MOUSE | 79327 | 100.00% | 11 | 12 | 21 | 13.80% | EFQEQLESAR             | 95.00% | 3.05 | 0.0822   | 3.51  | 0 | 1 | 0 | 2 | 1,236.59 | 219 | 228 |
| 7 | Methylcrotonyl-CoA carboxylase subunit alpha, mitochondrial | MCCA_MOUSE | 79327 | 100.00% | 11 | 12 | 21 | 13.80% | IEEAPAPGINPEVR         | 95.00% | 2.63 | 0.581    | 7.09  | 0 | 2 | 0 | 2 | 1,604.87 | 281 | 295 |
| 7 | Methylcrotonyl-CoA carboxylase subunit alpha, mitochondrial | MCCA_MOUSE | 79327 | 100.00% | 11 | 12 | 21 | 13.80% | LEEAIVR                | 95.00% | 2.45 | 0.114    | 2.41  | 0 | 2 | 0 | 2 | 715.4103 | 298 | 304 |
| 7 | Methylcrotonyl-CoA carboxylase subunit alpha, mitochondrial | MCCA_MOUSE | 79327 | 100.00% | 11 | 12 | 21 | 13.80% | LVVWASDR               | 95.00% | 2.57 | 0.519    | 3.05  | 0 | 2 | 0 | 2 | 945.5158 | 433 | 440 |
| 7 | Methylcrotonyl-CoA carboxylase subunit alpha, mitochondrial | MCCA_MOUSE | 79327 | 100.00% | 11 | 12 | 21 | 13.80% | SNVDFLLR               | 95.00% | 2.76 | 0.354    | 3.6   | 0 | 2 | 0 | 2 | 963.5264 | 461 | 468 |
| 7 | Methylcrotonyl-CoA carboxylase subunit alpha, mitochondrial | MCCA_MOUSE | 79327 | 100.00% | 11 | 12 | 21 | 13.80% | DLLPSSHSTIAK           | 95.00% | 2.35 | 0.476    | 2.24  | 0 | 2 | 0 | 2 | 1,181.65 | 491 | 501 |
| 7 | Methylcrotonyl-CoA carboxylase subunit alpha, mitochondrial | MCCA_MOUSE | 79327 | 100.00% | 11 | 12 | 21 | 13.80% | RLNISYTR               | 95.00% | 2.12 | 0.282    | 0     | 0 | 2 | 2 | 2 | 1,022.57 | 540 | 547 |
| 7 | Methylcrotonyl-CoA carboxylase subunit alpha, mitochondrial | MCCA_MOUSE | 79327 | 100.00% | 11 | 12 | 21 | 13.80% | LNISYTR                | 95.00% | 2.29 | 0.137    | 1.92  | 0 | 2 | 0 | 2 | 866.4736 | 541 | 547 |
| 7 | Methylcrotonyl-CoA carboxylase subunit alpha, mitochondrial | MCCA_MOUSE | 79327 | 100.00% | 11 | 12 | 21 | 13.80% | VLGDLSSDGGCTYVK        | 95.00% | 4.57 | 0.603    | 8.04  | 0 | 1 | 0 | 2 | 1        |     |     |

|    |                                  |             |       |         |    |     |     |        |                   |        |      |        |       |   |    |   |   |          |     |     |
|----|----------------------------------|-------------|-------|---------|----|-----|-----|--------|-------------------|--------|------|--------|-------|---|----|---|---|----------|-----|-----|
| 8  | T-complex protein 1 subunit zeta | TCPZ_MOUSE  | 57988 | 100.00% | 10 | 10  | 14  | 19.20% | GIDPFLDALAK       | 95.00% | 2.79 | 0.476  | 3.54  | 0 | 2  | 0 | 2 | 1,246.67 | 296 | 307 |
| 8  | T-complex protein 1 subunit zeta | TCPZ_MOUSE  | 57988 | 100.00% | 10 | 10  | 14  | 19.20% | VLAQNSGFDLQETLVK  | 95.00% | 4.29 | 0.633  | 8.33  | 0 | 1  | 0 | 2 | 1,761.94 | 450 | 465 |
| 9  | Protein disulfide-isomerase      | PDI1_MOUSE  | 57128 | 100.00% | 5  | 5   | 8   | 8.64%  | NFNGEITK          | 95.00% | 2.53 | 0.0852 | 3.06  | 0 | 3  | 0 | 2 | 1,051.51 | 216 | 224 |
| 9  | Protein disulfide-isomerase      | PDI1_MOUSE  | 57128 | 100.00% | 5  | 5   | 8   | 8.64%  | LLDFIK            | 95.00% | 2.01 | 0      | 1.43  | 0 | 1  | 0 | 2 | 748.4611 | 227 | 232 |
| 9  | Protein disulfide-isomerase      | PDI1_MOUSE  | 57128 | 100.00% | 5  | 5   | 8   | 8.64%  | YKPESDELTAEK      | 95.00% | 2.48 | 0.189  | 4     | 0 | 0  | 1 | 2 | 1,409.68 | 329 | 340 |
| 9  | Protein disulfide-isomerase      | PDI1_MOUSE  | 57128 | 100.00% | 5  | 5   | 8   | 8.64%  | QLAPIWDK          | 95.00% | 1.77 | 0.439  | 2.64  | 0 | 1  | 0 | 2 | 970.5364 | 404 | 411 |
| 9  | Protein disulfide-isomerase      | PDI1_MOUSE  | 57128 | 100.00% | 5  | 5   | 8   | 8.64%  | TVIDYNGER         | 95.00% | 2.58 | 0.347  | 3     | 0 | 2  | 0 | 2 | 1,066.52 | 455 | 463 |
| 10 | Tubulin beta-2C chain            | TBB2C_MOUSE | 49813 | 100.00% | 8  | 8   | 20  | 18.40% | EIVHLQAQCGGNQIGAK | 95.00% | 3.9  | 0.347  | 9.15  | 0 | 0  | 1 | 2 | 1,822.92 | 3   | 19  |
| 10 | Tubulin beta-2C chain            | TBB2C_MOUSE | 49813 | 100.00% | 8  | 8   | 20  | 18.40% | INVVYNEATGGK      | 95.00% | 3.43 | 0.39   | 7.41  | 0 | 3  | 0 | 2 | 1,328.65 | 47  | 58  |
| 10 | Tubulin beta-2C chain            | TBB2C_MOUSE | 49813 | 100.00% | 8  | 8   | 20  | 18.40% | FPGQLNADLR        | 95.00% | 2.68 | 0.355  | 3.72  | 0 | 3  | 0 | 2 | 1,130.60 | 242 | 251 |
| 10 | Tubulin beta-2C chain            | TBB2C_MOUSE | 49813 | 100.00% | 8  | 8   | 20  | 18.40% | FPGQLNADLRK       | 95.00% | 1.63 | 0.189  | 1.32  | 0 | 0  | 1 | 2 | 1,258.69 | 242 | 252 |
| 10 | Tubulin beta-2C chain            | TBB2C_MOUSE | 49813 | 100.00% | 8  | 8   | 20  | 18.40% | LAVNMVPPFR        | 95.00% | 1.86 | 0.411  | 2.77  | 0 | 1  | 0 | 2 | 1,159.63 | 253 | 262 |
| 10 | Tubulin beta-2C chain            | TBB2C_MOUSE | 49813 | 100.00% | 8  | 8   | 20  | 18.40% | YLTVAAVFR         | 95.00% | 2.49 | 0.514  | 4.29  | 0 | 1  | 0 | 2 | 1,039.59 | 310 | 318 |
| 10 | Tubulin beta-2C chain            | TBB2C_MOUSE | 49813 | 100.00% | 8  | 8   | 20  | 18.40% | NSSYFVWEIPNNVK    | 95.00% | 3.12 | 0.558  | 3.57  | 0 | 1  | 0 | 2 | 1,696.83 | 337 | 350 |
| 10 | Tubulin beta-2C chain            | TBB2C_MOUSE | 49813 | 100.00% | 8  | 8   | 20  | 18.40% | TAVCDIPPR         | 95.00% | 2.24 | 0.282  | 4.43  | 0 | 9  | 0 | 2 | 1,028.52 | 351 | 359 |
| 11 | Desmin                           | DESM_MOUSE  | 53481 | 100.00% | 26 | 33  | 58  | 50.70% | VYQVSR            | 95.00% | 1.7  | 0.164  | 0     | 0 | 1  | 0 | 2 | 751.4102 | 53  | 58  |
| 11 | Desmin                           | DESM_MOUSE  | 53481 | 100.00% | 26 | 33  | 58  | 50.70% | TSGGAGGLGSLR      | 95.00% | 2.65 | 0.474  | 2.89  | 0 | 2  | 0 | 2 | 1,032.54 | 59  | 70  |
| 11 | Desmin                           | DESM_MOUSE  | 53481 | 100.00% | 26 | 33  | 58  | 50.70% | TNEKVELQELNDR     | 95.00% | 3.74 | 0.339  | 0     | 0 | 0  | 1 | 2 | 1,587.80 | 105 | 117 |
| 11 | Desmin                           | DESM_MOUSE  | 53481 | 100.00% | 26 | 33  | 58  | 50.70% | VELQELNDR         | 95.00% | 3    | 0.295  | 1.15  | 0 | 2  | 0 | 2 | 1,115.57 | 109 | 117 |
| 11 | Desmin                           | DESM_MOUSE  | 53481 | 100.00% | 26 | 33  | 58  | 50.70% | FANYIEK           | 95.00% | 1.73 | 0.244  | 0     | 0 | 1  | 0 | 2 | 884.4518 | 118 | 124 |
| 11 | Desmin                           | DESM_MOUSE  | 53481 | 100.00% | 26 | 33  | 58  | 50.70% | FLEQQNAAALAEVNR   | 95.00% | 5.79 | 0.577  | 7.16  | 0 | 2  | 2 | 2 | 1,673.86 | 127 | 141 |
| 11 | Desmin                           | DESM_MOUSE  | 53481 | 100.00% | 26 | 33  | 58  | 50.70% | VAELYEEEMR        | 95.00% | 3.38 | 0.366  | 3.42  | 0 | 2  | 0 | 2 | 1,268.58 | 150 | 159 |
| 11 | Desmin                           | DESM_MOUSE  | 53481 | 100.00% | 26 | 33  | 58  | 50.70% | QVEVLTNQR         | 95.00% | 1.92 | 0.364  | 2.96  | 0 | 2  | 0 | 2 | 1,086.59 | 164 | 172 |
| 11 | Desmin                           | DESM_MOUSE  | 53481 | 100.00% | 26 | 33  | 58  | 50.70% | VDVERDNLIDDLQR    | 95.00% | 3.27 | 0.356  | 0     | 0 | 0  | 2 | 2 | 1,699.86 | 175 | 188 |
| 11 | Desmin                           | DESM_MOUSE  | 53481 | 100.00% | 26 | 33  | 58  | 50.70% | DNLIDDLQR         | 95.00% | 3.35 | 0.222  | 0     | 0 | 2  | 0 | 2 | 1,101.55 | 180 | 188 |
| 11 | Desmin                           | DESM_MOUSE  | 53481 | 100.00% | 26 | 33  | 58  | 50.70% | LQEEIQLR          | 95.00% | 1.93 | 0.125  | 0     | 1 | 2  | 0 | 2 | 1,028.57 | 193 | 200 |
| 11 | Desmin                           | DESM_MOUSE  | 53481 | 100.00% | 26 | 33  | 58  | 50.70% | EEAENLAAFR        | 95.00% | 2.67 | 0.428  | 2.06  | 0 | 2  | 0 | 2 | 1,263.60 | 201 | 211 |
| 11 | Desmin                           | DESM_MOUSE  | 53481 | 100.00% | 26 | 33  | 58  | 50.70% | ADVDAATLAR        | 95.00% | 4.02 | 0.412  | 2.54  | 2 | 2  | 0 | 2 | 1,002.52 | 212 | 221 |
| 11 | Desmin                           | DESM_MOUSE  | 53481 | 100.00% | 26 | 33  | 58  | 50.70% | IESLNEEIAFLK      | 95.00% | 4.06 | 0.429  | 2.92  | 0 | 2  | 0 | 2 | 1,405.76 | 228 | 239 |
| 11 | Desmin                           | DESM_MOUSE  | 53481 | 100.00% | 26 | 33  | 58  | 50.70% | AQYETIAAK         | 95.00% | 2.6  | 0.443  | 1.92  | 0 | 2  | 0 | 2 | 994.521  | 278 | 286 |
| 11 | Desmin                           | DESM_MOUSE  | 53481 | 100.00% | 26 | 33  | 58  | 50.70% | NISEAEEWYK        | 95.00% | 1.94 | 0.289  | 1.13  | 0 | 1  | 0 | 2 | 1,268.58 | 287 | 296 |
| 11 | Desmin                           | DESM_MOUSE  | 53481 | 100.00% | 26 | 33  | 58  | 50.70% | VSDLTQAANK        | 95.00% | 3.78 | 0.567  | 2.07  | 1 | 3  | 0 | 2 | 1,046.55 | 299 | 308 |
| 11 | Desmin                           | DESM_MOUSE  | 53481 | 100.00% | 26 | 33  | 58  | 50.70% | VSDLTQAANKNDALR   | 95.00% | 2.89 | 0.346  | 0     | 0 | 0  | 2 | 2 | 1,729.88 | 299 | 314 |
| 11 | Desmin                           | DESM_MOUSE  | 53481 | 100.00% | 26 | 33  | 58  | 50.70% | NNDALR            | 95.00% | 2.05 | 0.0628 | 0     | 0 | 2  | 0 | 2 | 702.3535 | 309 | 314 |
| 11 | Desmin                           | DESM_MOUSE  | 53481 | 100.00% | 26 | 33  | 58  | 50.70% | HQIQSYTCIEDALK    | 95.00% | 4.07 | 0.537  | 5.25  | 0 | 2  | 2 | 2 | 1,705.82 | 325 | 338 |
| 11 | Desmin                           | DESM_MOUSE  | 53481 | 100.00% | 26 | 33  | 58  | 50.70% | FASEANGYQDNIAIR   | 95.00% | 3.17 | 0.45   | 1.19  | 0 | 2  | 0 | 2 | 1,555.71 | 355 | 368 |
| 11 | Desmin                           | DESM_MOUSE  | 53481 | 100.00% | 26 | 33  | 58  | 50.70% | EYQDLLNVK         | 95.00% | 2.36 | 0.414  | 1.37  | 0 | 2  | 0 | 2 | 1,121.58 | 386 | 394 |
| 11 | Desmin                           | DESM_MOUSE  | 53481 | 100.00% | 26 | 33  | 58  | 50.70% | KLLEGEESR         | 95.00% | 1.68 | 0.325  | 0     | 0 | 1  | 2 | 2 | 1,060.56 | 406 | 414 |
| 11 | Desmin                           | DESM_MOUSE  | 53481 | 100.00% | 26 | 33  | 58  | 50.70% | LLEGEESR          | 95.00% | 2.48 | 0.342  | 0     | 1 | 2  | 0 | 2 | 932.469  | 407 | 414 |
| 11 | Desmin                           | DESM_MOUSE  | 53481 | 100.00% | 26 | 33  | 58  | 50.70% | INLPIQTFALSALNFR  | 95.00% | 2.78 | 0.503  | 6.59  | 0 | 1  | 0 | 2 | 1,633.91 | 415 | 428 |
| 11 | Desmin                           | DESM_MOUSE  | 53481 | 100.00% | 26 | 33  | 58  | 50.70% | DGEVVSSEATQQQHEVL | 95.00% | 2.8  | 0.571  | 1.3   | 0 | 2  | 0 | 2 | 1,768.84 | 454 | 469 |
| 12 | Desmin                           | DESM_MOUSE  | 53481 | 100.00% | 27 | 35  | 109 | 51.60% | TSGGAGGLGSLR      | 95.00% | 2.82 | 0.473  | 2.4   | 0 | 5  | 0 | 2 | 1,032.54 | 59  | 70  |
| 12 | Desmin                           | DESM_MOUSE  | 53481 | 100.00% | 27 | 35  | 109 | 51.60% | TNEKVELQELNDR     | 95.00% | 4.38 | 0.361  | 2.92  | 0 | 1  | 1 | 2 | 1,587.80 | 105 | 117 |
| 12 | Desmin                           | DESM_MOUSE  | 53481 | 100.00% | 27 | 35  | 109 | 51.60% | VELQELNDR         | 95.00% | 3.1  | 0.297  | 0.959 | 0 | 4  | 0 | 2 | 1,115.57 | 109 | 117 |
| 12 | Desmin                           | DESM_MOUSE  | 53481 | 100.00% | 27 | 35  | 109 | 51.60% | FANYIEK           | 95.00% | 2.67 | 0.277  | 1.28  | 1 | 5  | 0 | 2 | 884.4518 | 118 | 124 |
| 12 | Desmin                           | DESM_MOUSE  | 53481 | 100.00% | 27 | 35  | 109 | 51.60% | FLEQQNAAALAEVNR   | 95.00% | 5.76 | 0.573  | 4.74  | 0 | 4  | 0 | 2 | 1,673.86 | 127 | 141 |
| 12 | Desmin                           | DESM_MOUSE  | 53481 | 100.00% | 27 | 35  | 109 | 51.60% | VAELYEEEMR        | 95.00% | 3.24 | 0.465  | 0     | 0 | 2  | 0 | 2 | 1,284.58 | 150 | 159 |
| 12 | Desmin                           | DESM_MOUSE  | 53481 | 100.00% | 27 | 35  | 109 | 51.60% | RQVEVLTNQR        | 95.00% | 3.05 | 0.401  | 1.6   | 0 | 3  | 1 | 2 | 1,242.69 | 163 | 172 |
| 12 | Desmin                           | DESM_MOUSE  | 53481 | 100.00% | 27 | 35  | 109 | 51.60% | QVEVLTNQR         | 95.00% | 2.25 | 0.322  | 0.824 | 0 | 6  | 0 | 2 | 1,086.59 | 164 | 172 |
| 12 | Desmin                           | DESM_MOUSE  | 53481 | 100.00% | 27 | 35  | 109 | 51.60% | VDVERDNLIDDLQR    | 95.00% | 3.42 | 0.325  | 0     | 0 | 0  | 1 | 2 | 1,699.86 | 175 | 188 |
| 12 | Desmin                           | DESM_MOUSE  | 53481 | 100.00% | 27 | 35  | 109 | 51.60% | DNLIDDLQR         | 95.00% | 2.86 | 0.333  | 1.07  | 1 | 10 | 0 | 2 | 1,101.55 | 180 | 188 |
| 12 | Desmin                           | DESM_MOUSE  | 53481 | 100.00% | 27 | 35  | 109 | 51.60% | LQEEIQLR          | 95.00% | 3.08 | 0.0716 | 0     | 0 | 1  | 0 | 2 | 1,028.57 | 193 | 200 |
| 12 | Desmin                           | DESM_MOUSE  | 53481 | 100.00% | 27 | 35  | 109 | 51.60% | EEAENLAAFR        | 95.00% | 2.51 | 0.433  | 3.11  | 0 | 6  | 0 | 2 | 1,263.60 | 201 | 211 |
| 12 | Desmin                           | DESM_MOUSE  | 53481 | 100.00% | 27 | 35  | 109 | 51.60% | ADVDAATLAR        | 95.00% | 4.1  | 0.412  | 1.52  | 0 | 7  | 0 | 2 | 1,002.52 | 212 | 221 |
| 12 | Desmin                           | DESM_MOUSE  | 53481 | 100.00% | 27 | 35  | 109 | 51.60% | RIESLNEEIAFLKK    | 95.00% | 3.4  | 0.305  | 0     | 0 | 0  | 2 | 2 | 1,689.95 | 227 | 240 |
| 12 | Desmin                           | DESM_MOUSE  | 53481 | 100.00% | 27 | 35  | 109 | 51.60% | IESLNEEIAFLK      | 95.00% | 3.68 | 0.48   | 0     | 0 | 2  | 0 | 2 | 1,405.76 | 228 | 239 |
| 12 | Desmin                           | DESM_MOUSE  | 53481 | 100.00% | 27 | 35  | 109 | 51.60% | VHEEER            | 95.00% | 2.34 | 0.252  | 1.21  | 0 | 3  | 0 | 2 | 911.4587 | 241 | 247 |
| 12 | Desmin                           | DESM_MOUSE  | 53481 | 100.00% | 27 | 35  | 109 | 51.60% | AQYETIAAK         | 95.00% | 2.68 | 0.491  | 2     | 0 | 7  | 0 | 2 | 994.521  | 278 | 286 |
| 12 | Desmin                           | DESM_MOUSE  | 53481 | 100.00% | 27 | 35  | 109 | 51.60% | NISEAEEWYK        | 95.00% | 3.52 | 0.426  | 1.77  | 0 | 2  | 0 | 2 | 1,268.58 | 287 | 296 |
| 12 | Desmin                           | DESM_MOUSE  | 53481 | 100.00% | 27 | 35  | 109 | 51.60% | VSDLTQAANK        | 95.00% | 3.88 | 0.527  | 1.82  | 2 | 6  | 0 | 2 | 1,046.55 | 299 | 308 |
| 12 | Desmin                           | DESM_MOUSE  | 53481 | 100.00% | 27 | 35  | 109 | 51.60% | VSDLTQAANKNDALR   | 95.00% | 2.86 | 0.438  | 0.854 | 0 | 1  | 2 | 2 | 1,729.88 | 299 | 314 |
| 12 | Desmin                           | DESM_MOUSE  | 53481 | 100.00% | 27 | 35  | 109 | 51.60% | HQIQSYTCIEDALK    | 95.00% | 3.85 | 0.651  | 2.85  | 0 | 4  | 2 | 2 | 1,705.82 | 325 | 338 |
| 12 | Desmin                           | DESM_MOUSE  | 53481 | 100.00% | 27 | 35  | 109 | 51.60% | FASEANGYQDNIAIR   | 95.00% | 2.54 | 0.542  | 1.92  | 0 | 2  | 0 | 2 | 1,555.71 | 355 | 368 |
| 12 | Desmin                           | DESM_MOUSE  | 53481 | 100.00% | 27 | 35  | 109 | 51.60% | EYQDLLNVK         | 95.00% | 2.26 | 0.295  | 0     | 0 | 3  | 0 | 2 | 1,121.58 | 386 | 394 |
| 12 | Desmin                           | DESM_MOUSE  | 53481 | 100.00% | 27 | 35  | 109 | 51.60% | KLLEGEESR         | 95.00% | 2.89 | 0.266  | 0.62  | 0 | 2  | 4 | 2 | 1,060.56 | 406 | 414 |
| 12 | Desmin                           | DESM_MOUSE  | 53481 | 100.00% | 27 | 35  | 109 | 51.60% | LLEGEESR          | 95.00% | 2.8  | 0.263  | 1.16  | 0 | 1  | 0 | 2 | 932.469  | 407 | 414 |
| 12 | Desmin                           | DESM_MOUSE  | 53481 | 100.00% | 27 | 35  | 109 | 51.60% | INLPIQTFALSALNFR  | 95.00% | 2.74 | 0.54   | 3.55  | 0 | 1  | 0 | 2 | 1,633.91 | 415 | 428 |
| 12 | Desmin                           | DESM_MOUSE  | 53481 | 100.00% | 27 | 35  | 109 | 51.60% | DGEVVSSEATQQQHEVL | 95.00% | 3.69 | 0.586  | 2.62  | 0 | 4  | 0 | 2 | 1,768.84 | 454 | 469 |
| 13 | Fibrinogen gamma chain           | FIBG_MOUSE  | 49375 | 100.00% | 3  | 3</ |     |        |                   |        |      |        |       |   |    |   |   |          |     |     |

|    |                                |             |       |         |    |    |    |        |                        |        |      |       |      |   |   |   |          |          |     |     |
|----|--------------------------------|-------------|-------|---------|----|----|----|--------|------------------------|--------|------|-------|------|---|---|---|----------|----------|-----|-----|
| 14 | Protein disulfide-isomerase A3 | PDIA3_MOUSE | 56662 | 100.00% | 6  | 6  | 11 | 11.90% | DPNIVIAK               | 95.00% | 2.79 | 0.154 | 3.09 | 0 | 1 | 0 | 2        | 869.5098 | 426 | 433 |
| 15 | Fibrinogen beta chain          | FIBB_MOUSE  | 54736 | 100.00% | 10 | 11 | 19 | 21.00% | SILEDLR                | 95.00% | 2.21 | 0     | 1.52 | 0 | 1 | 0 | 2        | 845.4734 | 190 | 196 |
| 15 | Fibrinogen beta chain          | FIBB_MOUSE  | 54736 | 100.00% | 10 | 11 | 19 | 21.00% | TPCTVSCNIPVVSQK        | 95.00% | 3.46 | 0.548 | 3.24 | 0 | 2 | 0 | 2        | 1,618.79 | 215 | 229 |
| 15 | Fibrinogen beta chain          | FIBB_MOUSE  | 54736 | 100.00% | 10 | 11 | 19 | 21.00% | TENGGWTVIQNR           | 95.00% | 3.44 | 0.361 | 2    | 0 | 2 | 0 | 2        | 1,374.68 | 264 | 275 |
| 15 | Fibrinogen beta chain          | FIBB_MOUSE  | 54736 | 100.00% | 10 | 11 | 19 | 21.00% | QDGSVDFGR              | 95.00% | 1.29 | 0.385 | 1.8  | 0 | 2 | 0 | 2        | 980.4439 | 276 | 284 |
| 15 | Fibrinogen beta chain          | FIBB_MOUSE  | 54736 | 100.00% | 10 | 11 | 19 | 21.00% | GFGNIATNEDAK           | 95.00% | 3.31 | 0.461 | 3.8  | 0 | 2 | 0 | 2        | 1,236.59 | 292 | 303 |
| 15 | Fibrinogen beta chain          | FIBB_MOUSE  | 54736 | 100.00% | 10 | 11 | 19 | 21.00% | ISQLTR                 | 95.00% | 2.2  | 0.083 | 1.72 | 0 | 2 | 0 | 2        | 717.426  | 319 | 324 |
| 15 | Fibrinogen beta chain          | FIBB_MOUSE  | 54736 | 100.00% | 10 | 11 | 19 | 21.00% | AHYGGFTVQNEASK         | 95.00% | 2.17 | 0.276 | 1.18 | 0 | 0 | 2 | 2        | 1,508.71 | 344 | 357 |
| 15 | Fibrinogen beta chain          | FIBB_MOUSE  | 54736 | 100.00% | 10 | 11 | 19 | 21.00% | YQVSVNK                | 95.00% | 1.96 | 0.217 | 2.96 | 1 | 2 | 0 | 2        | 837.447  | 358 | 364 |
| 15 | Fibrinogen beta chain          | FIBB_MOUSE  | 54736 | 100.00% | 10 | 11 | 19 | 21.00% | DNDGWVTTDPR            | 95.00% | 1.95 | 0.211 | 5.16 | 0 | 1 | 0 | 2        | 1,275.56 | 401 | 411 |
| 15 | Fibrinogen beta chain          | FIBB_MOUSE  | 54736 | 100.00% | 10 | 11 | 19 | 21.00% | IRPFPPQQ               | 95.00% | 2.13 | 0.306 | 0    | 0 | 2 | 0 | 2        | 1,032.56 | 474 | 481 |
| 16 | Pyruvate kinase isozymes M1/M2 | KPYM_MOUSE  | 57828 | 100.00% | 23 | 25 | 40 | 37.70% | LDIDSAPITAR            | 95.00% | 3.36 | 0.351 | 3.1  | 0 | 2 | 0 | 2        | 1,171.63 | 33  | 43  |
| 16 | Pyruvate kinase isozymes M1/M2 | KPYM_MOUSE  | 57828 | 100.00% | 23 | 25 | 40 | 37.70% | NTGIICTIGPASR          | 95.00% | 4.54 | 0.579 | 2    | 0 | 2 | 0 | 2        | 1,359.71 | 44  | 56  |
| 16 | Pyruvate kinase isozymes M1/M2 | KPYM_MOUSE  | 57828 | 100.00% | 23 | 25 | 40 | 37.70% | EATESFASDPILYRPAVALDTK | 95.00% | 2.82 | 0.591 | 1.82 | 0 | 0 | 3 | 2        | 2,493.29 | 93  | 115 |
| 16 | Pyruvate kinase isozymes M1/M2 | KPYM_MOUSE  | 57828 | 100.00% | 23 | 25 | 40 | 37.70% | PVAVALDTK              | 95.00% | 2.67 | 0.611 | 2.48 | 0 | 1 | 0 | 1        | 913.536  | 107 | 115 |
| 16 | Pyruvate kinase isozymes M1/M2 | KPYM_MOUSE  | 57828 | 100.00% | 23 | 25 | 40 | 37.70% | GLIGKSGTAEVELKK        | 95.00% | 2.48 | 0.363 | 0    | 0 | 0 | 1 | 2        | 1,630.94 | 121 | 136 |
| 16 | Pyruvate kinase isozymes M1/M2 | KPYM_MOUSE  | 57828 | 100.00% | 23 | 25 | 40 | 37.70% | GSSTAEVELKK            | 95.00% | 2.25 | 0.327 | 0    | 0 | 1 | 0 | 2        | 1,118.61 | 126 | 136 |
| 16 | Pyruvate kinase isozymes M1/M2 | KPYM_MOUSE  | 57828 | 100.00% | 23 | 25 | 40 | 37.70% | CDENILWLDYK            | 95.00% | 4.17 | 0.591 | 2.13 | 0 | 2 | 0 | 2        | 1,468.68 | 152 | 162 |
| 16 | Pyruvate kinase isozymes M1/M2 | KPYM_MOUSE  | 57828 | 100.00% | 23 | 25 | 40 | 37.70% | CDENILWLDYKNICK        | 95.00% | 2.78 | 0.382 | 0    | 0 | 0 | 1 | 2        | 1,983.93 | 152 | 166 |
| 16 | Pyruvate kinase isozymes M1/M2 | KPYM_MOUSE  | 57828 | 100.00% | 23 | 25 | 40 | 37.70% | IYVDDGLISLQVK          | 95.00% | 4.58 | 0.392 | 2.49 | 0 | 2 | 0 | 2        | 1,462.82 | 174 | 186 |
| 16 | Pyruvate kinase isozymes M1/M2 | KPYM_MOUSE  | 57828 | 100.00% | 23 | 25 | 40 | 37.70% | EKGADFLVTEVENGGSLGSK   | 95.00% | 4.4  | 0.473 | 2.64 | 0 | 0 | 2 | 2        | 2,037.01 | 187 | 206 |
| 16 | Pyruvate kinase isozymes M1/M2 | KPYM_MOUSE  | 57828 | 100.00% | 23 | 25 | 40 | 37.70% | EKGADFLVTEVENGGSLGSKK  | 95.00% | 3.27 | 0.305 | 0    | 0 | 0 | 1 | 2        | 2,165.11 | 187 | 207 |
| 16 | Pyruvate kinase isozymes M1/M2 | KPYM_MOUSE  | 57828 | 100.00% | 23 | 25 | 40 | 37.70% | GADFLVTEVENGGSLGSK     | 95.00% | 5.05 | 0.582 | 3.02 | 0 | 2 | 0 | 2        | 1,779.88 | 189 | 206 |
| 16 | Pyruvate kinase isozymes M1/M2 | KPYM_MOUSE  | 57828 | 100.00% | 23 | 25 | 40 | 37.70% | GADFLVTEVENGGSLGSKK    | 95.00% | 3.19 | 0.398 | 1.89 | 0 | 0 | 1 | 2        | 1,907.97 | 189 | 207 |
| 16 | Pyruvate kinase isozymes M1/M2 | KPYM_MOUSE  | 57828 | 100.00% | 23 | 25 | 40 | 37.70% | KGVNLPGAAVDLPVSEKIDQLK | 95.00% | 2.04 | 0.449 | 3.4  | 0 | 0 | 1 | 2        | 2,477.36 | 207 | 230 |
| 16 | Pyruvate kinase isozymes M1/M2 | KPYM_MOUSE  | 57828 | 100.00% | 23 | 25 | 40 | 37.70% | GVNLPGAAVDLPVSEK       | 95.00% | 3.94 | 0.645 | 6.89 | 0 | 2 | 0 | 2        | 1,636.89 | 208 | 224 |
| 16 | Pyruvate kinase isozymes M1/M2 | KPYM_MOUSE  | 57828 | 100.00% | 23 | 25 | 40 | 37.70% | GVNLPGAAVDLPVSEKIDQLK  | 95.00% | 2.34 | 0.418 | 6.96 | 0 | 0 | 1 | 2        | 2,349.27 | 208 | 230 |
| 16 | Pyruvate kinase isozymes M1/M2 | KPYM_MOUSE  | 57828 | 100.00% | 23 | 25 | 40 | 37.70% | GDLGIEIPEAK            | 95.00% | 3.02 | 0.568 | 2.05 | 1 | 2 | 0 | 2        | 1,141.61 | 295 | 305 |
| 16 | Pyruvate kinase isozymes M1/M2 | KPYM_MOUSE  | 57828 | 100.00% | 23 | 25 | 40 | 37.70% | GDLGIEIPEAKVFLAQK      | 95.00% | 2.15 | 0.458 | 0    | 0 | 0 | 2 | 2        | 1,828.02 | 295 | 311 |
| 16 | Pyruvate kinase isozymes M1/M2 | KPYM_MOUSE  | 57828 | 100.00% | 23 | 25 | 40 | 37.70% | GDYPLEAVR              | 95.00% | 2.28 | 0.374 | 3.92 | 0 | 2 | 0 | 2        | 1,019.52 | 368 | 376 |
| 16 | Pyruvate kinase isozymes M1/M2 | KPYM_MOUSE  | 57828 | 100.00% | 23 | 25 | 40 | 37.70% | APIIAVTR               | 95.00% | 2.66 | 0.436 | 3.01 | 2 | 1 | 0 | 2        | 840.5308 | 448 | 455 |
| 16 | Pyruvate kinase isozymes M1/M2 | KPYM_MOUSE  | 57828 | 100.00% | 23 | 25 | 40 | 37.70% | GIFPVLCK               | 95.00% | 2.07 | 0.327 | 3.49 | 0 | 2 | 0 | 2        | 933.5233 | 468 | 475 |
| 16 | Pyruvate kinase isozymes M1/M2 | KPYM_MOUSE  | 57828 | 100.00% | 23 | 25 | 40 | 37.70% | DAVNLAWAEDVLDLR        | 95.00% | 3.81 | 0.632 | 5.08 | 0 | 2 | 0 | 2        | 1,586.78 | 476 | 489 |
| 16 | Pyruvate kinase isozymes M1/M2 | KPYM_MOUSE  | 57828 | 100.00% | 23 | 25 | 40 | 37.70% | VNLMADVKG              | 95.00% | 2.23 | 0.366 | 0    | 0 | 1 | 0 | 2        | 962.4982 | 490 | 498 |
| 17 | Pyruvate kinase isozymes M1/M2 | KPYM_MOUSE  | 57828 | 100.00% | 19 | 21 | 55 | 29.90% | LDIDSAPITAR            | 95.00% | 3.55 | 0.432 | 5.34 | 0 | 3 | 0 | 2        | 1,171.63 | 33  | 43  |
| 17 | Pyruvate kinase isozymes M1/M2 | KPYM_MOUSE  | 57828 | 100.00% | 19 | 21 | 55 | 29.90% | NTGIICTIGPASR          | 95.00% | 3.78 | 0.601 | 1.68 | 0 | 4 | 0 | 2        | 1,359.71 | 44  | 56  |
| 17 | Pyruvate kinase isozymes M1/M2 | KPYM_MOUSE  | 57828 | 100.00% | 19 | 21 | 55 | 29.90% | GSSTAEVELKK            | 95.00% | 2.86 | 0.392 | 0    | 0 | 3 | 0 | 2        | 1,118.61 | 126 | 136 |
| 17 | Pyruvate kinase isozymes M1/M2 | KPYM_MOUSE  | 57828 | 100.00% | 19 | 21 | 55 | 29.90% | CDENILWLDYK            | 95.00% | 4.29 | 0.566 | 2.62 | 0 | 4 | 0 | 2        | 1,468.68 | 152 | 162 |
| 17 | Pyruvate kinase isozymes M1/M2 | KPYM_MOUSE  | 57828 | 100.00% | 19 | 21 | 55 | 29.90% | VVEVGSK                | 95.00% | 2.09 | 0.251 | 3.01 | 0 | 1 | 0 | 2        | 717.4147 | 167 | 173 |
| 17 | Pyruvate kinase isozymes M1/M2 | KPYM_MOUSE  | 57828 | 100.00% | 19 | 21 | 55 | 29.90% | EKGADFLVTEVENGGSLGSK   | 95.00% | 3.07 | 0.334 | 0    | 0 | 1 | 2 | 2,037.01 | 187      | 206 |     |
| 17 | Pyruvate kinase isozymes M1/M2 | KPYM_MOUSE  | 57828 | 100.00% | 19 | 21 | 55 | 29.90% | GADFLVTEVENGGSLGSK     | 95.00% | 4.94 | 0.588 | 6.19 | 0 | 5 | 0 | 2        | 1,779.88 | 189 | 206 |
| 17 | Pyruvate kinase isozymes M1/M2 | KPYM_MOUSE  | 57828 | 100.00% | 19 | 21 | 55 | 29.90% | GADFLVTEVENGGSLGSKK    | 95.00% | 2.67 | 0.406 | 0    | 0 | 0 | 2 | 2        | 1,907.97 | 189 | 207 |
| 17 | Pyruvate kinase isozymes M1/M2 | KPYM_MOUSE  | 57828 | 100.00% | 19 | 21 | 55 | 29.90% | KGVNLPGAAVDLPVSEK      | 95.00% | 3.81 | 0.44  | 3.92 | 0 | 0 | 2 | 2        | 1,764.99 | 207 | 224 |
| 17 | Pyruvate kinase isozymes M1/M2 | KPYM_MOUSE  | 57828 | 100.00% | 19 | 21 | 55 | 29.90% | GVNLPGAAVDLPVSEK       | 95.00% | 3.87 | 0.717 | 5.09 | 0 | 4 | 0 | 2        | 1,636.89 | 208 | 224 |
| 17 | Pyruvate kinase isozymes M1/M2 | KPYM_MOUSE  | 57828 | 100.00% | 19 | 21 | 55 | 29.90% | GVNLPGAAVDLPVSEKIDQLK  | 95.00% | 2.4  | 0.439 | 3.07 | 0 | 0 | 1 | 2        | 2,349.27 | 208 | 230 |
| 17 | Pyruvate kinase isozymes M1/M2 | KPYM_MOUSE  | 57828 | 100.00% | 19 | 21 | 55 | 29.90% | KAADVHEVR              | 95.00% | 1.93 | 0.405 | 1.27 | 0 | 0 | 1 | 2        | 1,024.55 | 247 | 255 |
| 17 | Pyruvate kinase isozymes M1/M2 | KPYM_MOUSE  | 57828 | 100.00% | 19 | 21 | 55 | 29.90% | AADVHEVR               | 95.00% | 1.69 | 0.437 | 1.8  | 0 | 2 | 0 | 2        | 896.459  | 248 | 255 |
| 17 | Pyruvate kinase isozymes M1/M2 | KPYM_MOUSE  | 57828 | 100.00% | 19 | 21 | 55 | 29.90% | IENHEGVR               | 95.00% | 2.79 | 0.208 | 2.43 | 0 | 2 | 1 | 2        | 953.4805 | 271 | 278 |
| 17 | Pyruvate kinase isozymes M1/M2 | KPYM_MOUSE  | 57828 | 100.00% | 19 | 21 | 55 | 29.90% | GDLGIEIPEAK            | 95.00% | 3.28 | 0.484 | 1.66 | 0 | 4 | 0 | 2        | 1,141.61 | 295 | 305 |
| 17 | Pyruvate kinase isozymes M1/M2 | KPYM_MOUSE  | 57828 | 100.00% | 19 | 21 | 55 | 29.90% | GDYPLEAVR              | 95.00% | 2.55 | 0.375 | 2    | 0 | 4 | 0 | 2        | 1,019.52 | 368 | 376 |
| 17 | Pyruvate kinase isozymes M1/M2 | KPYM_MOUSE  | 57828 | 100.00% | 19 | 21 | 55 | 29.90% | APIIAVTR               | 95.00% | 2.77 | 0.42  | 4.21 | 2 | 4 | 0 | 2        | 840.5308 | 448 | 455 |
| 17 | Pyruvate kinase isozymes M1/M2 | KPYM_MOUSE  | 57828 | 100.00% | 19 | 21 | 55 | 29.90% | GIFPVLCK               | 95.00% | 2.4  | 0.366 | 3.44 | 0 | 3 | 0 | 2        | 933.5233 | 468 | 475 |
| 17 | Pyruvate kinase isozymes M1/M2 | KPYM_MOUSE  | 57828 | 100.00% | 19 | 21 | 55 | 29.90% | VNLMADVKG              | 95.00% | 2.36 | 0.266 | 4.17 | 0 | 2 | 0 | 2        | 962.4982 | 490 | 498 |
| 18 | Pyruvate kinase isozymes M1/M2 | KPYM_MOUSE  | 57828 | 100.00% | 9  | 9  | 14 | 20.00% | LDIDSAPITAR            | 95.00% | 2.88 | 0.425 | 3.51 | 0 | 2 | 0 | 2        | 1,171.63 | 33  | 43  |
| 18 | Pyruvate kinase isozymes M1/M2 | KPYM_MOUSE  | 57828 | 100.00% | 9  | 9  | 14 | 20.00% | NTGIICTIGPASR          | 95.00% | 3.45 | 0.599 | 5.48 | 0 | 2 | 0 | 2        | 1,359.71 | 44  | 56  |
| 18 | Pyruvate kinase isozymes M1/M2 | KPYM_MOUSE  | 57828 | 100.00% | 9  | 9  | 14 | 20.00% | CDENILWLDYK            | 95.00% | 2.58 | 0.541 | 4.74 | 0 | 1 | 0 | 2        | 1,468.68 | 152 | 162 |
| 18 | Pyruvate kinase isozymes M1/M2 | KPYM_MOUSE  | 57828 | 100.00% | 9  | 9  | 14 | 20.00% | GADFLVTEVENGGSLGSK     | 95.00% | 3.85 | 0.437 | 4    | 0 | 2 | 0 | 2        | 1,779.88 | 189 | 206 |
| 18 | Pyruvate kinase isozymes M1/M2 | KPYM_MOUSE  | 57828 | 100.00% | 9  | 9  | 14 | 20.00% | GVNLPGAAVDLPVSEK       | 95.00% | 3.18 | 0.567 | 5.32 | 0 | 1 | 0 | 2        | 1,636.89 | 208 | 224 |
| 18 | Pyruvate kinase isozymes M1/M2 | KPYM_MOUSE  | 57828 | 100.00% | 9  | 9  | 14 | 20.00% | GDLGIEIPEAK            | 95.00% | 2.97 | 0.51  | 0    | 0 | 1 | 0 | 2        | 1,141.61 | 295 | 305 |
| 18 | Pyruvate kinase isozymes M1/M2 | KPYM_MOUSE  | 57828 | 100.00% | 9  | 9  | 14 | 20.00% | GDYPLEAVR              | 95.00% | 2.21 | 0.347 | 0    | 0 | 2 | 0 | 2        | 1,019.52 | 368 | 376 |
| 18 | Pyruvate kinase isozymes M1/M2 | KPYM_MOUSE  | 57828 | 100.00% | 9  | 9  | 14 | 20.00% | APIIAVTR               | 95.00% | 2.05 | 0.34  | 3.06 | 0 | 2 | 0 | 2        | 840.5308 | 448 | 455 |
| 18 | Pyruvate kinase isozymes M1/M2 | KPYM_MOUSE  | 57828 | 100.00% | 9  | 9  | 14 | 20.00% | GIFPVLCK               | 95.00% | 1.69 | 0.341 | 0    | 0 | 1 | 0 | 2        | 933.5233 | 468 | 475 |
| 19 | Cytosol aminopeptidase         | AMPL_MOUSE  | 56125 | 100.00% | 5  | 5  | 9  | 13.30% | DKDDDLPQFTSAGESFNIK    | 95.00% | 2.68 | 0.458 | 1.51 | 0 | 0 | 1 | 2        | 2,013.90 | 44  | 61  |
| 19 | Cytosol aminopeptidase         | AMPL_MOUSE  | 56125 | 100.00% | 5  | 5  | 9  | 13.30% | GVLFASGQNLAR           | 95.00% | 3.64 | 0.325 | 1.92 | 0 | 3 | 0 | 2        | 1,232.68 | 189 | 200 |
| 19 | Cytosol aminopeptidase         | AMPL_MOUSE  | 56125 | 100.00% | 5  | 5  | 9  | 13.30% | TIQVDNTDAEGR           | 95.00% | 1.87 | 0.231 | 0    | 0 | 1 | 0 | 2        | 1,318.62 | 357 | 368 |
| 19 | Cytosol aminopeptidase         | AMPL_MOUSE  | 56125 | 100.00% | 5  | 5  | 9  | 13.30% | QVIDCQLADVNNLKG        |        |      |       |      |   |   |   |          |          |     |     |

|    |                                                                                |             |       |         |    |    |    |        |                         |        |      |        |      |   |   |   |          |          |     |     |
|----|--------------------------------------------------------------------------------|-------------|-------|---------|----|----|----|--------|-------------------------|--------|------|--------|------|---|---|---|----------|----------|-----|-----|
| 20 | Glutamate dehydrogenase 1, mitochondrial                                       | DHE3_MOUSE  | 61320 | 100.00% | 14 | 16 | 23 | 25.10% | GASIVEDKLVLEDLK         | 95.00% | 2.79 | 0.338  | 2.39 | 0 | 1 | 0 | 2        | 1,515.83 | 77  | 90  |
| 20 | Glutamate dehydrogenase 1, mitochondrial                                       | DHE3_MOUSE  | 61320 | 100.00% | 14 | 16 | 23 | 25.10% | LVEDLK                  | 95.00% | 1.85 | 0.108  | 0    | 0 | 1 | 0 | 2        | 716.4196 | 85  | 90  |
| 20 | Glutamate dehydrogenase 1, mitochondrial                                       | DHE3_MOUSE  | 61320 | 100.00% | 14 | 16 | 23 | 25.10% | DDGGSWEVIEGYR           | 95.00% | 4.03 | 0.615  | 2.38 | 0 | 2 | 0 | 2        | 1,425.63 | 125 | 136 |
| 20 | Glutamate dehydrogenase 1, mitochondrial                                       | DHE3_MOUSE  | 61320 | 100.00% | 14 | 16 | 23 | 25.10% | YSTDVSVEDEVK            | 95.00% | 2.48 | 0.468  | 1.89 | 1 | 2 | 0 | 2        | 1,241.59 | 152 | 162 |
| 20 | Glutamate dehydrogenase 1, mitochondrial                                       | DHE3_MOUSE  | 61320 | 100.00% | 14 | 16 | 23 | 25.10% | CAVVDVPGFGGAK           | 95.00% | 3.07 | 0.493  | 2.64 | 0 | 3 | 0 | 2        | 1,219.61 | 172 | 183 |
| 20 | Glutamate dehydrogenase 1, mitochondrial                                       | DHE3_MOUSE  | 61320 | 100.00% | 14 | 16 | 23 | 25.10% | PISQGGIHGR              | 95.00% | 2.91 | 0.488  | 1.01 | 0 | 0 | 1 | 1        | 1,021.55 | 259 | 268 |
| 20 | Glutamate dehydrogenase 1, mitochondrial                                       | DHE3_MOUSE  | 61320 | 100.00% | 14 | 16 | 23 | 25.10% | ELEDFK                  | 95.00% | 1.74 | 0.152  | 1.43 | 1 | 0 | 0 | 2        | 780.3781 | 347 | 352 |
| 20 | Glutamate dehydrogenase 1, mitochondrial                                       | DHE3_MOUSE  | 61320 | 100.00% | 14 | 16 | 23 | 25.10% | LQHGSILGFPPK            | 95.00% | 2.26 | 0.218  | 1.51 | 0 | 0 | 1 | 2        | 1,196.68 | 353 | 363 |
| 20 | Glutamate dehydrogenase 1, mitochondrial                                       | DHE3_MOUSE  | 61320 | 100.00% | 14 | 16 | 23 | 25.10% | IIAEGANGPTTPEADKIFLER   | 95.00% | 2.36 | 0.38   | 0    | 0 | 1 | 1 | 2        | 2,242.17 | 400 | 420 |
| 20 | Glutamate dehydrogenase 1, mitochondrial                                       | DHE3_MOUSE  | 61320 | 100.00% | 14 | 16 | 23 | 25.10% | LNHVSYGR                | 95.00% | 2.82 | 0.463  | 0    | 0 | 2 | 0 | 2        | 1,059.53 | 445 | 453 |
| 20 | Glutamate dehydrogenase 1, mitochondrial                                       | DHE3_MOUSE  | 61320 | 100.00% | 14 | 16 | 23 | 25.10% | HGGTIPVPTAEFQDR         | 95.00% | 2.03 | 0.118  | 1.66 | 0 | 0 | 1 | 2        | 1,723.88 | 481 | 496 |
| 20 | Glutamate dehydrogenase 1, mitochondrial                                       | DHE3_MOUSE  | 61320 | 100.00% | 14 | 16 | 23 | 25.10% | YPLGLDLR                | 95.00% | 3.07 | 0.4    | 1.46 | 0 | 2 | 0 | 2        | 963.5265 | 528 | 535 |
| 20 | Glutamate dehydrogenase 1, mitochondrial                                       | DHE3_MOUSE  | 61320 | 100.00% | 14 | 16 | 23 | 25.10% | TAAYVNAIEK              | 95.00% | 2.75 | 0.393  | 1.12 | 0 | 2 | 0 | 2        | 1,079.57 | 536 | 545 |
| 21 | Beta-enolase                                                                   | ENOB_MOUSE  | 47008 | 100.00% | 7  | 7  | 16 | 14.50% | TLGPALLEK               | 95.00% | 2.46 | 0.4    | 3.05 | 0 | 3 | 0 | 2        | 941.5674 | 72  | 80  |
| 21 | Beta-enolase                                                                   | ENOB_MOUSE  | 47008 | 100.00% | 7  | 7  | 16 | 14.50% | TAIQAAGYPDK             | 95.00% | 3.27 | 0.511  | 2.96 | 0 | 2 | 0 | 2        | 1,134.58 | 229 | 239 |
| 21 | Beta-enolase                                                                   | ENOB_MOUSE  | 47008 | 100.00% | 7  | 7  | 16 | 14.50% | YLDLDFK                 | 95.00% | 2.29 | 0.238  | 2.3  | 0 | 1 | 0 | 2        | 800.3832 | 257 | 262 |
| 21 | Beta-enolase                                                                   | ENOB_MOUSE  | 47008 | 100.00% | 7  | 7  | 16 | 14.50% | LGELYK                  | 95.00% | 1.6  | 0.134  | 1.64 | 0 | 3 | 0 | 2        | 722.409  | 276 | 281 |
| 21 | Beta-enolase                                                                   | ENOB_MOUSE  | 47008 | 100.00% | 7  | 7  | 16 | 14.50% | ACNCLLLK                | 95.00% | 2.62 | 0.407  | 2.77 | 0 | 2 | 0 | 2        | 991.507  | 336 | 343 |
| 21 | Beta-enolase                                                                   | ENOB_MOUSE  | 47008 | 100.00% | 7  | 7  | 16 | 14.50% | VNQIGSVTESIQACK         | 95.00% | 1.88 | 0.342  | 2.01 | 0 | 1 | 0 | 2        | 1,633.82 | 344 | 358 |
| 21 | Beta-enolase                                                                   | ENOB_MOUSE  | 47008 | 100.00% | 7  | 7  | 16 | 14.50% | IEEALGDK                | 95.00% | 1.98 | 0.257  | 2.52 | 0 | 4 | 0 | 2        | 874.4524 | 413 | 420 |
| 22 | Adenosine kinase                                                               | ADK_MOUSE   | 40132 | 99.80%  | 2  | 2  | 3  | 3.88%  | FGEILK                  | 95.00% | 1.8  | 0.276  | 0    | 0 | 1 | 0 | 2        | 706.4141 | 111 | 116 |
| 22 | Adenosine kinase                                                               | ADK_MOUSE   | 40132 | 99.80%  | 2  | 2  | 3  | 3.88%  | TVIFTOGR                | 95.00% | 2.02 | 0.1    | 1.09 | 0 | 2 | 0 | 2        | 921.5159 | 277 | 284 |
| 23 | Ornithine aminotransferase, mitochondrial                                      | OAT_MOUSE   | 48338 | 99.80%  | 2  | 2  | 3  | 4.78%  | IADIEIQTGLAR            | 95.00% | 0    | 0      | 5.26 | 0 | 2 | 0 | 1        | 1,186.64 | 261 | 271 |
| 23 | Ornithine aminotransferase, mitochondrial                                      | OAT_MOUSE   | 48338 | 99.80%  | 2  | 2  | 3  | 4.78%  | LPSDVTSVSR              | 95.00% | 2.8  | 0.295  | 3.44 | 0 | 1 | 0 | 2        | 1,072.60 | 363 | 372 |
| 24 | Pyruvate dehydrogenase E1 component subunit alpha, somatic form, mitochondrial | ODPA_MOUSE  | 43215 | 100.00% | 15 | 17 | 41 | 30.00% | LEEGPPTVTLVTR           | 95.00% | 3.29 | 0.513  | 1.92 | 0 | 7 | 0 | 2        | 1,411.78 | 46  | 58  |
| 24 | Pyruvate dehydrogenase E1 component subunit alpha, somatic form, mitochondrial | ODPA_MOUSE  | 43215 | 100.00% | 15 | 17 | 41 | 30.00% | ADQLYK                  | 95.00% | 2.16 | 0.205  | 0    | 0 | 2 | 0 | 2        | 737.3835 | 78  | 83  |
| 24 | Pyruvate dehydrogenase E1 component subunit alpha, somatic form, mitochondrial | ODPA_MOUSE  | 43215 | 100.00% | 15 | 17 | 41 | 30.00% | AHGFTFTR                | 95.00% | 1.94 | 0.39   | 2.8  | 0 | 2 | 0 | 2        | 936.4692 | 120 | 127 |
| 24 | Pyruvate dehydrogenase E1 component subunit alpha, somatic form, mitochondrial | ODPA_MOUSE  | 43215 | 100.00% | 15 | 17 | 41 | 30.00% | ALIAELTGR               | 95.00% | 3.32 | 0.383  | 2.6  | 0 | 6 | 0 | 2        | 943.5578 | 133 | 141 |
| 24 | Pyruvate dehydrogenase E1 component subunit alpha, somatic form, mitochondrial | ODPA_MOUSE  | 43215 | 100.00% | 15 | 17 | 41 | 30.00% | GAGIALACK               | 95.00% | 0    | 0      | 2.35 | 0 | 1 | 0 | 1        | 860.4666 | 174 | 182 |
| 24 | Pyruvate dehydrogenase E1 component subunit alpha, somatic form, mitochondrial | ODPA_MOUSE  | 43215 | 100.00% | 15 | 17 | 41 | 30.00% | LFCIFCENNR              | 95.00% | 2.73 | 0.429  | 1.41 | 0 | 2 | 0 | 2        | 1,435.68 | 216 | 226 |
| 24 | Pyruvate dehydrogenase E1 component subunit alpha, somatic form, mitochondrial | ODPA_MOUSE  | 43215 | 100.00% | 15 | 17 | 41 | 30.00% | AAASTDYK                | 95.00% | 2.36 | 0.435  | 1.92 | 0 | 2 | 0 | 2        | 989.458  | 236 | 244 |
| 24 | Pyruvate dehydrogenase E1 component subunit alpha, somatic form, mitochondrial | ODPA_MOUSE  | 43215 | 100.00% | 15 | 17 | 41 | 30.00% | GDFIPGLR                | 95.00% | 1.82 | 0.394  | 1.36 | 1 | 2 | 0 | 2        | 874.4789 | 264 | 253 |
| 24 | Pyruvate dehydrogenase E1 component subunit alpha, somatic form, mitochondrial | ODPA_MOUSE  | 43215 | 100.00% | 15 | 17 | 41 | 30.00% | VDGMDILLCR              | 95.00% | 3.65 | 0.413  | 2.66 | 0 | 2 | 0 | 2        | 1,193.57 | 254 | 263 |
| 24 | Pyruvate dehydrogenase E1 component subunit alpha, somatic form, mitochondrial | ODPA_MOUSE  | 43215 | 100.00% | 15 | 17 | 41 | 30.00% | EATKFAAYCR              | 95.00% | 1.7  | 0.29   | 0    | 0 | 1 | 2 | 1,287.62 | 264      | 274 |     |
| 24 | Pyruvate dehydrogenase E1 component subunit alpha, somatic form, mitochondrial | ODPA_MOUSE  | 43215 | 100.00% | 15 | 17 | 41 | 30.00% | FAAAYCR                 | 95.00% | 2.39 | 0.283  | 1.49 | 0 | 6 | 0 | 2        | 858.3932 | 268 | 274 |
| 24 | Pyruvate dehydrogenase E1 component subunit alpha, somatic form, mitochondrial | ODPA_MOUSE  | 43215 | 100.00% | 15 | 17 | 41 | 30.00% | TREEIQEVR               | 95.00% | 2.86 | 0.252  | 0    | 0 | 2 | 1 | 2        | 1,159.61 | 303 | 311 |
| 24 | Pyruvate dehydrogenase E1 component subunit alpha, somatic form, mitochondrial | ODPA_MOUSE  | 43215 | 100.00% | 15 | 17 | 41 | 30.00% | EEIQEVR                 | 95.00% | 1.73 | 0.162  | 0    | 0 | 1 | 0 | 2        | 902.4584 | 305 | 311 |
| 24 | Pyruvate dehydrogenase E1 component subunit alpha, somatic form, mitochondrial | ODPA_MOUSE  | 43215 | 100.00% | 15 | 17 | 41 | 30.00% | EIDVEVR                 | 95.00% | 1.96 | 0.167  | 0    | 0 | 2 | 0 | 2        | 859.4526 | 337 | 343 |
| 24 | Pyruvate dehydrogenase E1 component subunit alpha, somatic form, mitochondrial | ODPA_MOUSE  | 43215 | 100.00% | 15 | 17 | 41 | 30.00% | GANQWIK                 | 95.00% | 2.7  | 0.0475 | 0    | 0 | 1 | 0 | 2        | 816.4369 | 379 | 385 |
| 25 | Long-chain specific acyl-CoA dehydrogenase, mitochondrial                      | ACADL_MOUSE | 47891 | 99.80%  | 2  | 2  | 3  | 5.12%  | QGLLGINIAEK             | 95.00% | 1.9  | 0.401  | 2.03 | 0 | 1 | 0 | 2        | 1,155.67 | 96  | 106 |
| 25 | Long-chain specific acyl-CoA dehydrogenase, mitochondrial                      | ACADL_MOUSE | 47891 | 99.80%  | 2  | 2  | 3  | 5.12%  | SGSDWILNGSK             | 95.00% | 2.77 | 0.392  | 0    | 0 | 2 | 0 | 2        | 1,163.57 | 191 | 201 |
| 26 | Creatine kinase M-type                                                         | KCRM_MOUSE  | 43028 | 100.00% | 22 | 27 | 44 | 50.90% | LNYPKQEEYDLSK           | 95.00% | 3.13 | 0.456  | 0    | 0 | 1 | 1 | 2        | 1,723.85 | 12  | 25  |
| 26 | Creatine kinase M-type                                                         | KCRM_MOUSE  | 43028 | 100.00% | 22 | 27 | 44 | 50.90% | VLTPLVYKLR              | 95.00% | 2.12 | 0.293  | 2.66 | 0 | 0 | 2 | 2        | 1,331.77 | 33  | 43  |
| 26 | Creatine kinase M-type                                                         | KCRM_MOUSE  | 43028 | 100.00% | 22 | 27 | 44 | 50.90% | DLFDPHIQDR              | 95.00% | 3.4  | 0.467  | 3.64 | 0 | 2 | 0 | 2        | 1,231.63 | 87  | 96  |
| 26 | Creatine kinase M-type                                                         | KCRM_MOUSE  | 43028 | 100.00% | 22 | 27 | 44 | 50.90% | TDLNHENLKGDDLDPNVYVLSRR | 95.00% | 4.08 | 0.486  | 2.31 | 0 | 0 | 1 | 2        | 2,572.23 | 108 | 130 |
| 26 | Creatine kinase M-type                                                         | KCRM_MOUSE  | 43028 | 100.00% | 22 | 27 | 44 | 50.90% | GGDDLDPNVYVLSRR         | 95.00% | 3.51 | 0.551  | 5.21 | 0 | 2 | 0 | 2        | 1,507.70 | 117 | 130 |
| 26 | Creatine kinase M-type                                                         | KCRM_MOUSE  | 43028 | 100.00% | 22 | 27 | 44 | 50.90% | GTYLPHPCSR              | 95.00% | 2.14 | 0.413  | 3.2  | 0 | 4 | 0 | 2        | 1,187.56 | 139 | 148 |
| 26 | Creatine kinase M-type                                                         | KCRM_MOUSE  | 43028 | 100.00% | 22 | 27 | 44 | 50.90% | AVEKLSVEALNSLTGEFK      | 95.00% | 3.41 | 0.417  | 1.66 | 0 | 0 | 1 | 2        | 1,935.04 | 153 | 170 |
| 26 | Creatine kinase M-type                                                         | KCRM_MOUSE  | 43028 | 100.00% | 22 | 27 | 44 | 50.90% | LSVEALNSLTGEFK          | 95.00% | 4.68 | 0.568  | 6.14 | 0 | 2 | 0 | 2        | 1,507.80 | 157 | 170 |
| 26 | Creatine kinase M-type                                                         | KCRM_MOUSE  | 43028 | 100.00% | 22 | 27 | 44 | 50.90% | LSVEALNSLTGEFKGK        | 95.00% | 3.59 | 0.428  | 1.28 | 0 | 2 | 2 | 2        | 1,692.92 | 157 | 172 |
| 26 | Creatine kinase M-type                                                         | KCRM_MOUSE  | 43028 | 100.00% | 22 | 27 | 44 | 50.90% | YYPK                    | 95.00% | 1.35 | 0.255  | 0    | 1 | 2 | 0 | 2        | 683.3769 | 173 | 177 |
| 26 | Creatine kinase M-type                                                         | KCRM_MOUSE  | 43028 | 100.00% | 22 | 27 | 44 | 50.90% | DWPDAR                  | 95.00% | 1.44 | 0.159  | 0    | 1 | 0 | 0 | 2        | 759.3427 | 210 | 215 |
| 26 | Creatine kinase M-type                                                         | KCRM_MOUSE  | 43028 | 100.00% | 22 | 27 | 44 | 50.90% | SFLVWVNEEDHLR           | 95.00% | 3    | 0.417  | 1.29 | 0 | 1 | 2 | 2        | 1,643.82 | 224 | 236 |
| 26 | Creatine kinase M-type                                                         | KCRM_MOUSE  | 43028 | 100.00% | 22 | 27 | 44 | 50.90% | RFCVGLQK                | 95.00% | 2.35 | 0.413  | 0    | 0 | 0 | 2 | 2        | 1,007.55 | 252 | 259 |
| 26 | Creatine kinase M-type                                                         | KCRM_MOUSE  | 43028 | 100.00% | 22 | 27 | 44 | 50.90% | FCVGLQK                 | 95.00% | 1.78 | 0.268  | 1.68 | 1 | 2 | 0 | 2        | 851.445  | 253 | 259 |
| 26 | Creatine kinase M-type                                                         | KCRM_MOUSE  | 43028 | 100.00% | 22 | 27 | 44 | 50.90% | LANLSK                  | 95.00% | 1.72 | 0.151  | 0    | 0 | 1 | 0 | 2        | 645.3936 | 299 | 304 |
| 26 | Creatine kinase M-type                                                         | KCRM_MOUSE  | 43028 | 100.00% | 22 | 27 | 44 | 50.90% | HPKFEILTR               | 95.00% | 1.96 | 0.201  | 0    | 0 | 0 | 1 | 2        | 1,269.70 | 305 | 314 |
| 26 | Creatine kinase M-type                                                         | KCRM_MOUSE  | 43028 | 100.00% | 22 | 27 | 44 | 50.90% | FEEILTR                 | 95.00% | 2.7  | 0.243  | 0    | 0 | 0 | 2 | 2        | 907.489  | 308 | 314 |
| 26 | Creatine kinase M-type                                                         | KCRM_MOUSE  | 43028 | 100.00% | 22 | 27 | 44 | 50.90% | RGTGGVDTAAGVAVDISNADR   | 95.00% | 3.51 | 0.423  | 4.12 | 0 | 0 | 1 | 2        | 2,149.06 | 320 | 341 |
| 26 | Creatine kinase M-type                                                         | KCRM_MOUSE  | 43028 | 100.00% | 22 | 27 | 44 | 50.90% | GTGGVDTAAGVAVDISNADR    | 95.00% | 4.29 | 0.659  | 6.2  | 0 | 2 | 0 | 2        | 1,992.96 | 321 | 341 |
| 26 | Creatine kinase M-type                                                         | KCRM_MOUSE  | 43028 | 100.00% | 22 | 27 | 44 | 50.90% | LGSSEVEQQLVVDGVK        | 95.00% | 4.66 | 0.437  | 3.34 | 0 | 2 | 0 | 2        | 1,785.96 | 342 | 358 |
| 26 | Creatine kinase M-type                                                         | KCRM_MOUSE  | 43028 | 100.00% | 22 | 27 | 44 | 50.90% | LGSSEVEQQLVVDGVKLMVEMEK | 95.00% | 2.17 | 0.166  | 0    | 0 | 0 | 1 | 2        | 2,678.36 | 342 | 365 |
| 26 | Creatine kinase M-type                                                         | KCRM_MOUSE  | 43028 | 100.00% | 22 | 27 | 44 | 50.90% | GQSIDMIPAQK             | 95.00% | 3.07 | 0.426  | 1.96 | 0 | 2 | 0 | 2        | 1,318.63 | 370 | 381 |
| 26 | Long-chain specific acyl-CoA dehydrogenase, mitochondrial                      | ACADL_MOUSE | 47891 | 100.00% | 18 | 23 | 33 | 40.90% | RIFSSEHDFR              | 95.00% | 2.87 | 0.358  | 1.26 | 0 | 0 | 1 | 2        | 1,406.72 | 51  | 61  |
| 26 | Long-chain specific acyl-CoA dehydrogenase, mitochondrial                      | ACADL_MOUSE | 47891 | 100.00% | 18 | 23 | 33 | 40.90% | IFSSSEHDFR              | 95.00% | 2.98 | 0.414  | 1.64 | 0 | 2 | 0 | 2        | 1,250.62 | 52  | 61  |
| 26 | Long-chain specific acyl-CoA dehydrogenase, mitochondrial                      | ACADL_MOUSE | 47891 | 100.00% | 18 | 23 | 33 | 40.90% | FFQEEVPHHTEWEK          | 95.00% | 2.9  | 0.458  | 0    | 0 | 2 | 2 | 2        | 1,955.93 | 67  | 81  |
| 26 | Long-chain specific acyl-CoA dehydrogenase, mitochondrial                      | ACADL_MOUSE | 47891 | 100.00% |    |    |    |        |                         |        |      |        |      |   |   |   |          |          |     |     |

|    |                                                           |             |       |         |    |    |     |        |                           |        |      |        |      |   |    |   |   |          |     |     |
|----|-----------------------------------------------------------|-------------|-------|---------|----|----|-----|--------|---------------------------|--------|------|--------|------|---|----|---|---|----------|-----|-----|
| 26 | Long-chain specific acyl-CoA dehydrogenase, mitochondrial | ACADL_MOUSE | 47891 | 100.00% | 18 | 23 | 33  | 40.90% | THICVTR                   | 95.00% | 1.75 | 0.293  | 1.28 | 0 | 1  | 0 | 2 | 886.4569 | 339 | 345 |
| 26 | Long-chain specific acyl-CoA dehydrogenase, mitochondrial | ACADL_MOUSE | 47891 | 100.00% | 18 | 23 | 33  | 40.90% | AFVDSCLQLHETK             | 95.00% | 3.85 | 0.604  | 2.34 | 0 | 2  | 1 | 2 | 1,547.75 | 346 | 358 |
| 26 | Long-chain specific acyl-CoA dehydrogenase, mitochondrial | ACADL_MOUSE | 47891 | 100.00% | 18 | 23 | 33  | 40.90% | AFVDSCLQLHETKR            | 95.00% | 2.55 | 0.46   | 2.49 | 0 | 0  | 2 | 2 | 1,703.85 | 346 | 359 |
| 26 | Long-chain specific acyl-CoA dehydrogenase, mitochondrial | ACADL_MOUSE | 47891 | 100.00% | 18 | 23 | 33  | 40.90% | VQPIYGGTNEIMK             | 95.00% | 2.06 | 0.401  | 1.96 | 0 | 1  | 0 | 2 | 1,449.74 | 407 | 419 |
| 26 | Long-chain specific acyl-CoA dehydrogenase, mitochondrial | ACADL_MOUSE | 47891 | 100.00% | 18 | 23 | 33  | 40.90% | VQPIYGGTNEIMKELIAR        | 95.00% | 1.64 | 0.468  | 3.05 | 0 | 1  | 1 | 2 | 2,032.09 | 407 | 424 |
| 27 | Creatine kinase M-type                                    | KCRM_MOUSE  | 43028 | 100.00% | 24 | 35 | 133 | 54.10% | FKLNYKPEEYDLSK            | 95.00% | 3.37 | 0.341  | 0    | 0 | 0  | 2 | 2 | 1,999.02 | 10  | 25  |
| 27 | Creatine kinase M-type                                    | KCRM_MOUSE  | 43028 | 100.00% | 24 | 35 | 133 | 54.10% | LNYPKPEEYDLSK             | 95.00% | 4.23 | 0.429  | 2    | 0 | 3  | 3 | 2 | 1,723.85 | 12  | 25  |
| 27 | Creatine kinase M-type                                    | KCRM_MOUSE  | 43028 | 100.00% | 24 | 35 | 133 | 54.10% | VLTDPDLYNK                | 95.00% | 2.09 | 0.411  | 1.42 | 1 | 8  | 0 | 2 | 1,062.58 | 33  | 41  |
| 27 | Creatine kinase M-type                                    | KCRM_MOUSE  | 43028 | 100.00% | 24 | 35 | 133 | 54.10% | DLFDPIIQDR                | 95.00% | 3.29 | 0.457  | 2.41 | 1 | 8  | 0 | 2 | 1,231.63 | 87  | 96  |
| 27 | Creatine kinase M-type                                    | KCRM_MOUSE  | 43028 | 100.00% | 24 | 35 | 133 | 54.10% | HGGYKPTDK                 | 95.00% | 3    | 0.551  | 1.32 | 0 | 2  | 0 | 2 | 1,002.50 | 97  | 105 |
| 27 | Creatine kinase M-type                                    | KCRM_MOUSE  | 43028 | 100.00% | 24 | 35 | 133 | 54.10% | TDLNHNENLK                | 95.00% | 2.47 | 0.347  | 0    | 0 | 3  | 0 | 2 | 1,083.54 | 108 | 116 |
| 27 | Creatine kinase M-type                                    | KCRM_MOUSE  | 43028 | 100.00% | 24 | 35 | 133 | 54.10% | TDLNHNENLKGDDLDPNVYLSSR   | 95.00% | 3.91 | 0.433  | 3.85 | 0 | 0  | 2 | 2 | 2,572.23 | 108 | 130 |
| 27 | Creatine kinase M-type                                    | KCRM_MOUSE  | 43028 | 100.00% | 24 | 35 | 133 | 54.10% | GGDDLDPNVYLSSR            | 95.00% | 4.05 | 0.568  | 6.62 | 0 | 5  | 0 | 2 | 1,507.70 | 117 | 130 |
| 27 | Creatine kinase M-type                                    | KCRM_MOUSE  | 43028 | 100.00% | 24 | 35 | 133 | 54.10% | GTYLPPHCSR                | 95.00% | 2.61 | 0.515  | 2.13 | 0 | 10 | 6 | 2 | 1,187.56 | 139 | 148 |
| 27 | Creatine kinase M-type                                    | KCRM_MOUSE  | 43028 | 100.00% | 24 | 35 | 133 | 54.10% | LSVEALNSLTGFCK            | 95.00% | 4.59 | 0.577  | 7.21 | 2 | 8  | 0 | 2 | 1,507.80 | 157 | 170 |
| 27 | Creatine kinase M-type                                    | KCRM_MOUSE  | 43028 | 100.00% | 24 | 35 | 133 | 54.10% | LSVEALNSLTGFCKGK          | 95.00% | 2.61 | 0.418  | 0    | 0 | 1  | 5 | 2 | 1,692.92 | 157 | 172 |
| 27 | Creatine kinase M-type                                    | KCRM_MOUSE  | 43028 | 100.00% | 24 | 35 | 133 | 54.10% | YYPLK                     | 95.00% | 1.85 | 0.194  | 1.02 | 3 | 3  | 0 | 2 | 683.3769 | 173 | 177 |
| 27 | Creatine kinase M-type                                    | KCRM_MOUSE  | 43028 | 100.00% | 24 | 35 | 133 | 54.10% | WVNNVEDHLR                | 95.00% | 2.4  | 0.484  | 0    | 0 | 2  | 5 | 2 | 1,643.82 | 224 | 236 |
| 27 | Creatine kinase M-type                                    | KCRM_MOUSE  | 43028 | 100.00% | 24 | 35 | 133 | 54.10% | RFCVGLQK                  | 95.00% | 2.83 | 0.396  | 0    | 0 | 0  | 2 | 2 | 1,007.55 | 252 | 259 |
| 27 | Creatine kinase M-type                                    | KCRM_MOUSE  | 43028 | 100.00% | 24 | 35 | 133 | 54.10% | FCVGLQK                   | 95.00% | 2.45 | 0.283  | 0    | 4 | 4  | 0 | 2 | 851.445  | 253 | 259 |
| 27 | Creatine kinase M-type                                    | KCRM_MOUSE  | 43028 | 100.00% | 24 | 35 | 133 | 54.10% | VLTCPNSLGTGLR             | 95.00% | 0    | 0      | 2.8  | 0 | 1  | 0 | 1 | 1,387.74 | 280 | 292 |
| 27 | Creatine kinase M-type                                    | KCRM_MOUSE  | 43028 | 100.00% | 24 | 35 | 133 | 54.10% | LANLSK                    | 95.00% | 1.8  | 0.131  | 0    | 2 | 2  | 0 | 2 | 645.3936 | 299 | 304 |
| 27 | Creatine kinase M-type                                    | KCRM_MOUSE  | 43028 | 100.00% | 24 | 35 | 133 | 54.10% | HPKFEEILTR                | 95.00% | 2.48 | 0.332  | 0    | 0 | 0  | 3 | 2 | 1,269.70 | 305 | 314 |
| 27 | Creatine kinase M-type                                    | KCRM_MOUSE  | 43028 | 100.00% | 24 | 35 | 133 | 54.10% | FEEILTR                   | 95.00% | 2.25 | 0.194  | 0    | 2 | 10 | 0 | 2 | 907.489  | 308 | 314 |
| 27 | Creatine kinase M-type                                    | KCRM_MOUSE  | 43028 | 100.00% | 24 | 35 | 133 | 54.10% | RTGGVDVTAAGVAFDISNADR     | 95.00% | 4.52 | 0.528  | 4.72 | 0 | 0  | 4 | 2 | 2,149.06 | 320 | 341 |
| 27 | Creatine kinase M-type                                    | KCRM_MOUSE  | 43028 | 100.00% | 24 | 35 | 133 | 54.10% | GTGGVDVTAAGVAFDISNADR     | 95.00% | 4.96 | 0.667  | 5.18 | 0 | 5  | 0 | 2 | 1,992.96 | 321 | 341 |
| 27 | Creatine kinase M-type                                    | KCRM_MOUSE  | 43028 | 100.00% | 24 | 35 | 133 | 54.10% | LGSSEVEQQLVVDGVK          | 95.00% | 3.96 | 0.538  | 2.8  | 0 | 4  | 0 | 2 | 1,785.96 | 342 | 358 |
| 27 | Creatine kinase M-type                                    | KCRM_MOUSE  | 43028 | 100.00% | 24 | 35 | 133 | 54.10% | LGSSEVEQQLVVDGVKLMVEMEK   | 95.00% | 2.43 | 0.468  | 0    | 0 | 0  | 1 | 2 | 2,678.36 | 342 | 365 |
| 27 | Creatine kinase M-type                                    | KCRM_MOUSE  | 43028 | 100.00% | 24 | 35 | 133 | 54.10% | GQSIDDMPAQK               | 95.00% | 2.49 | 0.482  | 2.33 | 0 | 6  | 0 | 2 | 1,318.63 | 370 | 381 |
| 28 | Fructose-bisphosphate aldolase A                          | ALDOA_MOUSE | 39339 | 100.00% | 22 | 30 | 85  | 52.50% | KELSDIAHR                 | 95.00% | 2.8  | 0.312  | 1.21 | 0 | 0  | 2 | 2 | 1,068.58 | 14  | 22  |
| 28 | Fructose-bisphosphate aldolase A                          | ALDOA_MOUSE | 39339 | 100.00% | 22 | 30 | 85  | 52.50% | ELSDIAHR                  | 95.00% | 1.98 | 0.335  | 1.42 | 0 | 3  | 0 | 2 | 940.4853 | 15  | 22  |
| 28 | Fructose-bisphosphate aldolase A                          | ALDOA_MOUSE | 39339 | 100.00% | 22 | 30 | 85  | 52.50% | GILAADESTGSIK             | 95.00% | 4.88 | 0.623  | 5.28 | 2 | 7  | 0 | 2 | 1,332.70 | 29  | 42  |
| 28 | Fructose-bisphosphate aldolase A                          | ALDOA_MOUSE | 39339 | 100.00% | 22 | 30 | 85  | 52.50% | GILAADESTGSIARR           | 95.00% | 2.9  | 0.463  | 0    | 0 | 4  | 0 | 2 | 1,488.80 | 29  | 43  |
| 28 | Fructose-bisphosphate aldolase A                          | ALDOA_MOUSE | 39339 | 100.00% | 22 | 30 | 85  | 52.50% | LQSIGTENTEENRR            | 95.00% | 2.51 | 0.338  | 0    | 0 | 1  | 0 | 2 | 1,802.91 | 43  | 57  |
| 28 | Fructose-bisphosphate aldolase A                          | ALDOA_MOUSE | 39339 | 100.00% | 22 | 30 | 85  | 52.50% | LQSIGTENTEENR             | 95.00% | 2.68 | 0.456  | 0    | 0 | 1  | 0 | 2 | 1,490.71 | 44  | 56  |
| 28 | Fructose-bisphosphate aldolase A                          | ALDOA_MOUSE | 39339 | 100.00% | 22 | 30 | 85  | 52.50% | QLLLTADR                  | 95.00% | 2.49 | 0.501  | 2.35 | 0 | 3  | 0 | 2 | 1,044.57 | 61  | 69  |
| 28 | Fructose-bisphosphate aldolase A                          | ALDOA_MOUSE | 39339 | 100.00% | 22 | 30 | 85  | 52.50% | ADDGRPPQVIK               | 95.00% | 3.29 | 0.387  | 1.66 | 0 | 1  | 3 | 2 | 1,342.71 | 88  | 99  |
| 28 | Fructose-bisphosphate aldolase A                          | ALDOA_MOUSE | 39339 | 100.00% | 22 | 30 | 85  | 52.50% | GGVWGKVDK                 | 95.00% | 2.13 | 0.413  | 2.21 | 0 | 3  | 1 | 2 | 971.5892 | 102 | 111 |
| 28 | Fructose-bisphosphate aldolase A                          | ALDOA_MOUSE | 39339 | 100.00% | 22 | 30 | 85  | 52.50% | VDKGVVPLAGTNGETTQGLDGLSER | 95.00% | 4.17 | 0.589  | 4.09 | 0 | 0  | 2 | 2 | 2,614.33 | 109 | 134 |
| 28 | Fructose-bisphosphate aldolase A                          | ALDOA_MOUSE | 39339 | 100.00% | 22 | 30 | 85  | 52.50% | GVVPLAGTNGETTQGLDGLSER    | 95.00% | 5.73 | 0.721  | 6.96 | 0 | 6  | 0 | 2 | 2,272.14 | 112 | 134 |
| 28 | Fructose-bisphosphate aldolase A                          | ALDOA_MOUSE | 39339 | 100.00% | 22 | 30 | 85  | 52.50% | DGADFAPK                  | 95.00% | 1.89 | 0.351  | 0    | 2 | 4  | 0 | 2 | 723.3315 | 141 | 147 |
| 28 | Fructose-bisphosphate aldolase A                          | ALDOA_MOUSE | 39339 | 100.00% | 22 | 30 | 85  | 52.50% | YASICQNGIVPIPEILPDGDHDLK  | 95.00% | 4.02 | 0.429  | 3.62 | 0 | 0  | 1 | 2 | 3,020.50 | 174 | 200 |
| 28 | Fructose-bisphosphate aldolase A                          | ALDOA_MOUSE | 39339 | 100.00% | 22 | 30 | 85  | 52.50% | YASICQNGIVPIPEILPDGDHDLKR | 95.00% | 5.04 | 0.626  | 3.06 | 0 | 0  | 1 | 2 | 3,176.61 | 174 | 201 |
| 28 | Fructose-bisphosphate aldolase A                          | ALDOA_MOUSE | 39339 | 100.00% | 22 | 30 | 85  | 52.50% | CQVTEK                    | 95.00% | 2.54 | 0.342  | 0    | 0 | 3  | 0 | 2 | 927.4246 | 202 | 208 |
| 28 | Fructose-bisphosphate aldolase A                          | ALDOA_MOUSE | 39339 | 100.00% | 22 | 30 | 85  | 52.50% | VLAAYVK                   | 95.00% | 2.02 | 0.32   | 0    | 5 | 3  | 0 | 2 | 763.4718 | 209 | 215 |
| 28 | Fructose-bisphosphate aldolase A                          | ALDOA_MOUSE | 39339 | 100.00% | 22 | 30 | 85  | 52.50% | ALQASALK                  | 95.00% | 2.19 | 0.207  | 0    | 1 | 6  | 0 | 2 | 801.4835 | 305 | 312 |
| 28 | Fructose-bisphosphate aldolase A                          | ALDOA_MOUSE | 39339 | 100.00% | 22 | 30 | 85  | 52.50% | AAQEEYIK                  | 95.00% | 2.52 | 0.356  | 1.14 | 0 | 2  | 0 | 2 | 951.4788 | 323 | 330 |
| 28 | Fructose-bisphosphate aldolase A                          | ALDOA_MOUSE | 39339 | 100.00% | 22 | 30 | 85  | 52.50% | AAQEEYIKR                 | 95.00% | 2.16 | 0.353  | 0    | 0 | 3  | 2 | 2 | 1,107.58 | 323 | 331 |
| 28 | Fructose-bisphosphate aldolase A                          | ALDOA_MOUSE | 39339 | 100.00% | 22 | 30 | 85  | 52.50% | RALANSLACQK               | 95.00% | 1.56 | 0.344  | 0    | 0 | 0  | 1 | 2 | 1,288.68 | 331 | 342 |
| 28 | Fructose-bisphosphate aldolase A                          | ALDOA_MOUSE | 39339 | 100.00% | 22 | 30 | 85  | 52.50% | ALANSLACQK                | 95.00% | 3.49 | 0.546  | 3.8  | 2 | 9  | 0 | 2 | 1,132.58 | 332 | 342 |
| 28 | Fructose-bisphosphate aldolase A                          | ALDOA_MOUSE | 39339 | 100.00% | 22 | 30 | 85  | 52.50% | YTPSGQSQAASESLFISNHAY     | 95.00% | 4.26 | 0.654  | 3.74 | 0 | 1  | 0 | 2 | 2,258.04 | 343 | 364 |
| 29 | Aldose reductase                                          | ALDR_MOUSE  | 35715 | 100.00% | 13 | 14 | 30  | 38.60% | SPRPGQVTEAVK              | 95.00% | 2.94 | 0.475  | 2.57 | 0 | 5  | 0 | 2 | 1,112.60 | 23  | 33  |
| 29 | Aldose reductase                                          | ALDR_MOUSE  | 35715 | 100.00% | 13 | 14 | 30  | 38.60% | VAIDLGYR                  | 95.00% | 2.47 | 0.319  | 2.7  | 0 | 4  | 0 | 2 | 906.505  | 34  | 41  |
| 29 | Aldose reductase                                          | ALDR_MOUSE  | 35715 | 100.00% | 13 | 14 | 30  | 38.60% | HIDCAQVYQNEK              | 95.00% | 3.24 | 0.612  | 3.28 | 0 | 1  | 3 | 2 | 1,504.69 | 42  | 53  |
| 29 | Aldose reductase                                          | ALDR_MOUSE  | 35715 | 100.00% | 13 | 14 | 30  | 38.60% | EVGVALQEK                 | 95.00% | 2.41 | 0.294  | 0    | 0 | 4  | 0 | 2 | 972.5367 | 54  | 62  |
| 29 | Aldose reductase                                          | ALDR_MOUSE  | 35715 | 100.00% | 13 | 14 | 30  | 38.60% | QDLFVSK                   | 95.00% | 1.69 | 0.162  | 1.72 | 0 | 1  | 0 | 2 | 949.536  | 71  | 78  |
| 29 | Aldose reductase                                          | ALDR_MOUSE  | 35715 | 100.00% | 13 | 14 | 30  | 38.60% | WVCTFDHK                  | 95.00% | 2.73 | 0.449  | 0    | 0 | 1  | 0 | 2 | 1,106.51 | 79  | 86  |
| 29 | Aldose reductase                                          | ALDR_MOUSE  | 35715 | 100.00% | 13 | 14 | 30  | 38.60% | TIGVSNFNPQIER             | 95.00% | 3.48 | 0.484  | 2.02 | 0 | 1  | 0 | 2 | 1,587.85 | 156 | 169 |
| 29 | Aldose reductase                                          | ALDR_MOUSE  | 35715 | 100.00% | 13 | 14 | 30  | 38.60% | ILNKPLGK                  | 95.00% | 2.07 | 0.217  | 0    | 0 | 1  | 0 | 2 | 882.5779 | 170 | 177 |
| 29 | Aldose reductase                                          | ALDR_MOUSE  | 35715 | 100.00% | 13 | 14 | 30  | 38.60% | LIEYCHSK                  | 95.00% | 1.94 | 0.247  | 0    | 0 | 1  | 0 | 2 | 1,049.51 | 196 | 203 |
| 29 | Aldose reductase                                          | ALDR_MOUSE  | 35715 | 100.00% | 13 | 14 | 30  | 38.60% | PEDPSLLEDPR               | 95.00% | 3.18 | 0.566  | 1.85 | 0 | 1  | 0 | 1 | 1,267.62 | 223 | 233 |
| 29 | Aldose reductase                                          | ALDR_MOUSE  | 35715 | 100.00% | 13 | 14 | 30  | 38.60% | TTAQVILR                  | 95.00% | 2.79 | 0.322  | 2.43 | 0 | 5  | 0 | 2 | 901.5472 | 244 | 251 |
| 29 | Aldose reductase                                          | ALDR_MOUSE  | 35715 | 100.00% | 13 | 14 | 30  | 38.60% | NLVVIPK                   | 95.00% | 1.9  | 0.0407 | 1.8  | 1 | 0  | 0 | 2 | 782.5141 | 257 | 263 |
| 29 | Aldose reductase                                          | ALDR_MOUSE  | 35715 | 100.00% | 13 | 14 | 30  | 38.60% | HKDYPFHAEV                | 95.00% | 1.78 | 0.315  | 0    | 0 | 0  | 1 | 2 | 1,242.59 | 307 | 316 |
| 30 | Glyceraldehyde-3-phosphate dehydrogenase                  | G3P_MOUSE   | 35792 | 100.00% | 8  | 9  | 15  | 29.10% | LVINGKPIITFOER            | 95.00% | 3.74 | 0.502  | 2.36 | 0 | 2  | 2 | 2 | 1,627.95 | 65  | 78  |
| 30 | Glyceraldehyde-3-phosphate dehydrogenase                  | G3P_MOUSE   | 35792 | 100.00% | 8  | 9  | 15  | 29.10% | IVSNASCITINCLAPLAK        | 95.00% | 3.71 | 0.603  | 4.66 | 0 | 2  | 0 | 2 | 1,819.90 | 144 | 160 |
| 30 | Glyceraldehyde-3-phosphate dehydrogenase                  | G3P_MOUSE   | 35792 | 100.00% | 8  | 9  | 15  | 29.10% | DGRGAANIIPASTGAAK         | 95.00% |      |        |      |   |    |   |   |          |     |     |



|    |                                                            |             |       |         |    |    |    |        |                       |        |      |         |       |   |   |   |          |          |     |     |
|----|------------------------------------------------------------|-------------|-------|---------|----|----|----|--------|-----------------------|--------|------|---------|-------|---|---|---|----------|----------|-----|-----|
| 30 | Glyoxylate reductase/hydroxypyruvate reductase             | GRHPR_MOUSE | 35312 | 100.00% | 10 | 12 | 18 | 23.50% | LLDAAGANLR            | 95.00% | 3.05 | 0.31    | 2.05  | 0 | 2 | 0 | 2        | 1,013.57 | 67  | 76  |
| 30 | Glyoxylate reductase/hydroxypyruvate reductase             | GRHPR_MOUSE | 35312 | 100.00% | 10 | 12 | 18 | 23.50% | RLPEAIEEVK            | 95.00% | 3.37 | 0.362   | 1.55  | 0 | 2 | 1 | 2        | 1,183.67 | 125 | 134 |
| 30 | Glyoxylate reductase/hydroxypyruvate reductase             | GRHPR_MOUSE | 35312 | 100.00% | 10 | 12 | 18 | 23.50% | LPEAIEEVK             | 95.00% | 3.13 | 0.35    | 1.24  | 0 | 2 | 0 | 2        | 1,027.57 | 126 | 134 |
| 30 | Glyoxylate reductase/hydroxypyruvate reductase             | GRHPR_MOUSE | 35312 | 100.00% | 10 | 12 | 18 | 23.50% | LKPPFGVQR             | 95.00% | 1.98 | 0.125   | 2.32  | 0 | 0 | 1 | 2        | 944.5683 | 172 | 179 |
| 30 | Glyoxylate reductase/hydroxypyruvate reductase             | GRHPR_MOUSE | 35312 | 100.00% | 10 | 12 | 18 | 23.50% | FVLTGR                | 95.00% | 1.7  | 0.295   | 0     | 1 | 0 | 0 | 2        | 756.4045 | 180 | 185 |
| 30 | Glyoxylate reductase/hydroxypyruvate reductase             | GRHPR_MOUSE | 35312 | 100.00% | 10 | 12 | 18 | 23.50% | NCLVILPHIGSATYK       | 95.00% | 2.83 | 0.276   | 3.37  | 0 | 2 | 2 | 2        | 1,572.82 | 287 | 300 |
| 31 | Glyceraldehyde-3-phosphate dehydrogenase                   | G3P_MOUSE   | 35792 | 100.00% | 9  | 10 | 28 | 28.80% | VGVNGFGR              | 95.00% | 1.53 | 0.105   | 1.77  | 2 | 0 | 0 | 2        | 805.4321 | 4   | 11  |
| 31 | Glyceraldehyde-3-phosphate dehydrogenase                   | G3P_MOUSE   | 35792 | 100.00% | 9  | 10 | 28 | 28.80% | AAICSGK               | 95.00% | 1.18 | 0.492   | 0     | 0 | 2 | 0 | 2        | 706.3559 | 19  | 25  |
| 31 | Glyceraldehyde-3-phosphate dehydrogenase                   | G3P_MOUSE   | 35792 | 100.00% | 9  | 10 | 28 | 28.80% | LVINGKPIITFQER        | 95.00% | 2.55 | 0.458   | 0.921 | 0 | 0 | 4 | 2        | 1,627.95 | 65  | 78  |
| 31 | Glyceraldehyde-3-phosphate dehydrogenase                   | G3P_MOUSE   | 35792 | 100.00% | 9  | 10 | 28 | 28.80% | PITIFQER              | 95.00% | 2.24 | 0.261   | 2.49  | 0 | 4 | 0 | 1        | 1,003.56 | 71  | 78  |
| 31 | Glyceraldehyde-3-phosphate dehydrogenase                   | G3P_MOUSE   | 35792 | 100.00% | 9  | 10 | 28 | 28.80% | IVSNASCITTNCLAPLAK    | 95.00% | 3.76 | 0.609   | 2.85  | 0 | 2 | 0 | 2        | 1,819.90 | 144 | 160 |
| 31 | Glyceraldehyde-3-phosphate dehydrogenase                   | G3P_MOUSE   | 35792 | 100.00% | 9  | 10 | 28 | 28.80% | GAAQNIIPASTGAAK       | 95.00% | 3.11 | 0.426   | 4.16  | 2 | 3 | 0 | 2        | 1,369.74 | 199 | 213 |
| 31 | Glyceraldehyde-3-phosphate dehydrogenase                   | G3P_MOUSE   | 35792 | 100.00% | 9  | 10 | 28 | 28.80% | LTGMAFRVPTPNVSVVDLTCR | 95.00% | 2.57 | 0.363   | 0.77  | 0 | 0 | 1 | 2        | 2,333.21 | 226 | 246 |
| 31 | Glyceraldehyde-3-phosphate dehydrogenase                   | G3P_MOUSE   | 35792 | 100.00% | 9  | 10 | 28 | 28.80% | VPTPNVSVVDLTCR        | 95.00% | 3.61 | 0.611   | 3.92  | 0 | 6 | 0 | 2        | 1,556.81 | 233 | 246 |
| 31 | Glyceraldehyde-3-phosphate dehydrogenase                   | G3P_MOUSE   | 35792 | 100.00% | 9  | 10 | 28 | 28.80% | LISWYDNEYGYSNR        | 95.00% | 4.13 | 0.589   | 4.72  | 0 | 2 | 0 | 2        | 1,779.80 | 308 | 321 |
| 32 | L-lactate dehydrogenase A chain                            | LDHA_MOUSE  | 36481 | 100.00% | 6  | 6  | 8  | 15.10% | LVIIITAGAR            | 95.00% | 3.36 | 0.35    | 4.92  | 0 | 2 | 0 | 2        | 913.5836 | 91  | 99  |
| 32 | L-lactate dehydrogenase A chain                            | LDHA_MOUSE  | 36481 | 100.00% | 6  | 6  | 8  | 15.10% | LNLVQR                | 95.00% | 1.69 | 0.00217 | 1.55  | 0 | 1 | 0 | 2        | 742.4576 | 107 | 112 |
| 32 | L-lactate dehydrogenase A chain                            | LDHA_MOUSE  | 36481 | 100.00% | 6  | 6  | 8  | 15.10% | NVNIFK                | 95.00% | 2.03 | 0.107   | 1.96  | 0 | 2 | 0 | 2        | 734.4201 | 113 | 118 |
| 32 | L-lactate dehydrogenase A chain                            | LDHA_MOUSE  | 36481 | 100.00% | 6  | 6  | 8  | 15.10% | FIIPNIVK              | 95.00% | 1.9  | 0       | 1.57  | 0 | 1 | 0 | 2        | 943.5982 | 119 | 126 |
| 32 | L-lactate dehydrogenase A chain                            | LDHA_MOUSE  | 36481 | 100.00% | 6  | 6  | 8  | 15.10% | QVVD5AYEVIK           | 95.00% | 2.27 | 0.476   | 2.96  | 0 | 1 | 0 | 2        | 1,250.66 | 233 | 243 |
| 32 | L-lactate dehydrogenase A chain                            | LDHA_MOUSE  | 36481 | 100.00% | 6  | 6  | 8  | 15.10% | VTLTPEEAR             | 95.00% | 1.8  | 0.135   | 0     | 0 | 1 | 0 | 2        | 1,144.59 | 306 | 315 |
| 33 | L-lactate dehydrogenase A chain                            | LDHA_MOUSE  | 36481 | 100.00% | 11 | 13 | 23 | 30.10% | DQLVLNLIK             | 95.00% | 2.76 | 0.311   | 0     | 0 | 2 | 0 | 2        | 1,055.65 | 6   | 14  |
| 33 | L-lactate dehydrogenase A chain                            | LDHA_MOUSE  | 36481 | 100.00% | 11 | 13 | 23 | 30.10% | DYCVTANSK             | 95.00% | 2.97 | 0.546   | 2.26  | 0 | 2 | 0 | 2        | 1,057.46 | 82  | 90  |
| 33 | L-lactate dehydrogenase A chain                            | LDHA_MOUSE  | 36481 | 100.00% | 11 | 13 | 23 | 30.10% | LVIIITAGAR            | 95.00% | 2.75 | 0.378   | 0     | 0 | 2 | 0 | 2        | 913.5836 | 91  | 99  |
| 33 | L-lactate dehydrogenase A chain                            | LDHA_MOUSE  | 36481 | 100.00% | 11 | 13 | 23 | 30.10% | LNLVQR                | 95.00% | 2.36 | 0.0923  | 0     | 0 | 3 | 0 | 2        | 742.4576 | 107 | 112 |
| 33 | L-lactate dehydrogenase A chain                            | LDHA_MOUSE  | 36481 | 100.00% | 11 | 13 | 23 | 30.10% | NVNIFK                | 95.00% | 2.18 | 0.161   | 0     | 2 | 1 | 0 | 2        | 734.4201 | 113 | 118 |
| 33 | L-lactate dehydrogenase A chain                            | LDHA_MOUSE  | 36481 | 100.00% | 11 | 13 | 23 | 30.10% | ISGFPK                | 95.00% | 1.34 | 0.245   | 0     | 1 | 0 | 0 | 2        | 648.3722 | 150 | 155 |
| 33 | L-lactate dehydrogenase A chain                            | LDHA_MOUSE  | 36481 | 100.00% | 11 | 13 | 23 | 30.10% | IVSGGNCNLSAR          | 95.00% | 3.06 | 0.538   | 4.57  | 0 | 2 | 0 | 2        | 1,248.60 | 158 | 169 |
| 33 | L-lactate dehydrogenase A chain                            | LDHA_MOUSE  | 36481 | 100.00% | 11 | 13 | 23 | 30.10% | SINPELGTADAK          | 95.00% | 2.46 | 0.433   | 1.4   | 0 | 1 | 0 | 2        | 1,259.61 | 213 | 224 |
| 33 | L-lactate dehydrogenase A chain                            | LDHA_MOUSE  | 36481 | 100.00% | 11 | 13 | 23 | 30.10% | QVVD5AYEVIK           | 95.00% | 2.57 | 0.507   | 2.16  | 0 | 3 | 0 | 2        | 1,250.66 | 233 | 243 |
| 33 | L-lactate dehydrogenase A chain                            | LDHA_MOUSE  | 36481 | 100.00% | 11 | 13 | 23 | 30.10% | VTLTPEEAR             | 95.00% | 1.78 | 0.366   | 1.96  | 1 | 1 | 0 | 2        | 1,144.59 | 306 | 315 |
| 33 | L-lactate dehydrogenase A chain                            | LDHA_MOUSE  | 36481 | 100.00% | 11 | 13 | 23 | 30.10% | SADTLWGQIK            | 95.00% | 3.04 | 0.397   | 3.43  | 0 | 2 | 0 | 2        | 1,118.58 | 319 | 328 |
| 34 | Delta(3,5)-Delta(2,4)-dienoyl-CoA isomerase, mitochondrial | ECH1_MOUSE  | 36101 | 100.00% | 4  | 4  | 11 | 10.10% | ELVECFQK              | 95.00% | 2.22 | 0.362   | 0     | 0 | 4 | 0 | 2        | 1,052.51 | 87  | 94  |
| 34 | Delta(3,5)-Delta(2,4)-dienoyl-CoA isomerase, mitochondrial | ECH1_MOUSE  | 36101 | 100.00% | 4  | 4  | 11 | 10.10% | AVVVSAGGAK            | 95.00% | 2.4  | 0.372   | 4.22  | 0 | 3 | 0 | 2        | 787.4678 | 103 | 111 |
| 34 | Delta(3,5)-Delta(2,4)-dienoyl-CoA isomerase, mitochondrial | ECH1_MOUSE  | 36101 | 100.00% | 4  | 4  | 11 | 10.10% | SPVAVQSGSK            | 95.00% | 2.42 | 0.414   | 3.03  | 0 | 1 | 0 | 2        | 872.4842 | 267 | 275 |
| 34 | Delta(3,5)-Delta(2,4)-dienoyl-CoA isomerase, mitochondrial | ECH1_MOUSE  | 36101 | 100.00% | 4  | 4  | 11 | 10.10% | INLVYSR               | 95.00% | 2.59 | 0.225   | 1.92  | 0 | 3 | 0 | 2        | 878.51   | 276 | 282 |
| 35 | Hydroxyacyl-coenzyme A dehydrogenase, mitochondrial        | HCDH_MOUSE  | 34447 | 100.00% | 12 | 14 | 32 | 22.00% | KGIEESLK              | 95.00% | 2.8  | 0.225   | 0     | 0 | 2 | 0 | 2        | 903.5153 | 68  | 75  |
| 35 | Hydroxyacyl-coenzyme A dehydrogenase, mitochondrial        | HCDH_MOUSE  | 34447 | 100.00% | 12 | 14 | 32 | 22.00% | KGIEESLKR             | 95.00% | 2.5  | 0.198   | 1.2   | 0 | 0 | 2 | 2        | 1,059.62 | 68  | 76  |
| 35 | Hydroxyacyl-coenzyme A dehydrogenase, mitochondrial        | HCDH_MOUSE  | 34447 | 100.00% | 12 | 14 | 32 | 22.00% | GIEESLKR              | 95.00% | 1.99 | 0.174   | 1.89  | 0 | 2 | 0 | 2        | 931.5214 | 69  | 76  |
| 35 | Hydroxyacyl-coenzyme A dehydrogenase, mitochondrial        | HCDH_MOUSE  | 34447 | 100.00% | 12 | 14 | 32 | 22.00% | AGDFEVEK              | 95.00% | 3.36 | 0.291   | 4.24  | 1 | 5 | 0 | 2        | 894.421  | 88  | 95  |
| 35 | Hydroxyacyl-coenzyme A dehydrogenase, mitochondrial        | HCDH_MOUSE  | 34447 | 100.00% | 12 | 14 | 32 | 22.00% | LKNELFQR              | 95.00% | 2.88 | 0.283   | 2.1   | 0 | 2 | 0 | 2        | 1,047.60 | 126 | 133 |
| 35 | Hydroxyacyl-coenzyme A dehydrogenase, mitochondrial        | HCDH_MOUSE  | 34447 | 100.00% | 12 | 14 | 32 | 22.00% | LNFQR                 | 95.00% | 2.53 | 0.043   | 2.07  | 0 | 2 | 0 | 2        | 806.4161 | 128 | 133 |
| 35 | Hydroxyacyl-coenzyme A dehydrogenase, mitochondrial        | HCDH_MOUSE  | 34447 | 100.00% | 12 | 14 | 32 | 22.00% | LVEVIK                | 95.00% | 2.01 | 0.195   | 1.2   | 0 | 2 | 0 | 2        | 700.461  | 180 | 185 |
| 35 | Hydroxyacyl-coenzyme A dehydrogenase, mitochondrial        | HCDH_MOUSE  | 34447 | 100.00% | 12 | 14 | 32 | 22.00% | TFSVDFCK              | 95.00% | 3.34 | 0.522   | 3.85  | 1 | 4 | 0 | 2        | 1,245.58 | 193 | 202 |
| 35 | Hydroxyacyl-coenzyme A dehydrogenase, mitochondrial        | HCDH_MOUSE  | 34447 | 100.00% | 12 | 14 | 32 | 22.00% | DTFPGFIVNR            | 95.00% | 2.6  | 0.389   | 1.1   | 0 | 3 | 0 | 2        | 1,018.53 | 213 | 221 |
| 35 | Hydroxyacyl-coenzyme A dehydrogenase, mitochondrial        | HCDH_MOUSE  | 34447 | 100.00% | 12 | 14 | 32 | 22.00% | LLVPYLIAVR            | 95.00% | 2.86 | 0.371   | 4.1   | 0 | 4 | 0 | 2        | 1,285.79 | 222 | 232 |
| 35 | Hydroxyacyl-coenzyme A dehydrogenase, mitochondrial        | HCDH_MOUSE  | 34447 | 100.00% | 12 | 14 | 32 | 22.00% | KTGEGFYK              | 95.00% | 2.47 | 0.103   | 3.36  | 0 | 0 | 1 | 2        | 929.4734 | 305 | 312 |
| 35 | Hydroxyacyl-coenzyme A dehydrogenase, mitochondrial        | HCDH_MOUSE  | 34447 | 100.00% | 12 | 14 | 32 | 22.00% | TGEGFYK               | 95.00% | 1.78 | 0.327   | 2.4   | 0 | 1 | 0 | 2        | 801.3784 | 306 | 312 |
| 36 | ATP synthase subunit gamma, mitochondrial                  | ATPG_MOUSE  | 32869 | 100.00% | 5  | 5  | 8  | 15.10% | HLITGVSSDR            | 95.00% | 2.78 | 0.307   | 1.72  | 0 | 2 | 0 | 2        | 1,096.61 | 91  | 100 |
| 36 | ATP synthase subunit gamma, mitochondrial                  | ATPG_MOUSE  | 32869 | 100.00% | 5  | 5  | 8  | 15.10% | QMKNEVALTAAGK         | 95.00% | 1.68 | 0.185   | 0     | 0 | 1 | 2 | 1,431.76 | 113      | 126 |     |
| 36 | ATP synthase subunit gamma, mitochondrial                  | ATPG_MOUSE  | 32869 | 100.00% | 5  | 5  | 8  | 15.10% | NEVALTAAGK            | 95.00% | 2.98 | 0.305   | 3.14  | 0 | 2 | 0 | 2        | 1,044.57 | 116 | 126 |
| 36 | ATP synthase subunit gamma, mitochondrial                  | ATPG_MOUSE  | 32869 | 100.00% | 5  | 5  | 8  | 15.10% | EVMIIVGVEK            | 95.00% | 2.69 | 0.391   | 2.38  | 0 | 2 | 0 | 2        | 1,060.57 | 127 | 136 |
| 36 | ATP synthase subunit gamma, mitochondrial                  | ATPG_MOUSE  | 32869 | 100.00% | 5  | 5  | 8  | 15.10% | THSDQFLVSK            | 95.00% | 3.19 | 0.597   | 0.854 | 0 | 1 | 0 | 2        | 1,308.66 | 144 | 154 |
| 37 | Troponin I, cardiac muscle                                 | TNNI3_MOUSE | 24242 | 99.90%  | 2  | 2  | 5  | 9.48%  | AYATEPHAH             | 95.00% | 2.11 | 0.326   | 2.37  | 0 | 2 | 0 | 2        | 987.49   | 29  | 37  |
| 37 | Troponin I, cardiac muscle                                 | TNNI3_MOUSE | 24242 | 99.90%  | 2  | 2  | 5  | 9.48%  | NITEIADLTQK           | 95.00% | 3.55 | 0.504   | 6.24  | 0 | 3 | 0 | 2        | 1,245.67 | 122 | 132 |
| 38 | Apolipoprotein A-I                                         | APOA1_MOUSE | 30569 | 100.00% | 6  | 6  | 8  | 19.70% | LGPLTR                | 95.00% | 1.47 | 0.272   | 0     | 0 | 1 | 0 | 2        | 656.4097 | 87  | 92  |
| 38 | Apolipoprotein A-I                                         | APOA1_MOUSE | 30569 | 100.00% | 6  | 6  | 8  | 19.70% | VQPYLDEFQK            | 95.00% | 2.05 | 0.359   | 3.89  | 0 | 1 | 0 | 2        | 1,266.64 | 120 | 129 |
| 38 | Apolipoprotein A-I                                         | APOA1_MOUSE | 30569 | 100.00% | 6  | 6  | 8  | 19.70% | EDVELYR               | 95.00% | 2.06 | 0.237   | 1.8   | 0 | 2 | 0 | 2        | 923.4475 | 133 | 139 |
| 38 | Apolipoprotein A-I                                         | APOA1_MOUSE | 30569 | 100.00% | 6  | 6  | 8  | 19.70% | VAPLGAELQESAR         | 95.00% | 2.8  | 0.591   | 6.49  | 0 | 1 | 0 | 2        | 1,340.72 | 142 | 154 |
| 38 | Apolipoprotein A-I                                         | APOA1_MOUSE | 30569 | 100.00% | 6  | 6  | 8  | 19.70% | LSPVAEERF             | 95.00% | 1.79 | 0.43    | 3.1   | 0 | 2 | 0 | 2        | 1,047.55 | 164 | 172 |
| 38 | Apolipoprotein A-I                                         | APOA1_MOUSE | 30569 | 100.00% | 6  | 6  | 8  | 19.70% | PALEDLR               | 95.00% | 1.64 | 0.351   | 1.96  | 0 | 1 | 0 | 1        | 813.4472 | 230 | 236 |
| 39 | Heat shock protein beta-1                                  | HSPB1_MOUSE | 22996 | 99.80%  | 2  | 2  | 4  | 9.09%  | LFDQAFGVPR            | 95.00% | 3.13 | 0.406   | 4.55  | 0 | 2 | 0 | 2        | 1,149.61 | 29  | 38  |
| 39 | Heat shock protein beta-1                                  | HSPB1_MOUSE | 22996 | 99.80%  | 2  | 2  | 4  | 9.09%  | EGVVEITGK             | 95.00% | 2.3  | 0.446   | 2.92  | 0 | 2 | 0 | 2        | 931.5102 | 119 | 127 |
| 40 | Triosephosphate isomerase                                  | TPIS_MOUSE  | 26694 | 100.00% | 5  | 5  | 12 | 20.50% | FFVGGNWK              | 95.00% | 2.12 | 0.368   | 1.68  | 0 | 2 | 0 | 2        | 954.4838 | 7   | 14  |
| 40 | Triosephosphate isomerase                                  | TPIS_MOUSE  | 26694 | 100.00% | 5  | 5  | 12 | 20.50% | IAVAANQCYK            | 95.00% | 2.93 | 0.403   | 2.28  | 0 | 3 | 0 | 2        | 1,137.57 | 60  | 69  |
| 40 | Triosephosphate isomerase                                  | TPIS_MOUSE  | 26694 | 100.00% | 5  | 5  | 12 | 20.50% | HVFGESDELIGQK         | 95.00% | 3.22 | 0.227   | 2.55  | 0 | 0 | 1 | 2        | 1,458.72 | 101 | 113 |
| 40 | Triosephosphate isomerase                                  | TPIS_MOUSE  |       |         |    |    |    |        |                       |        |      |         |       |   |   |   |          |          |     |     |

|    |                                                                     |             |       |         |    |    |    |        |                     |        |      |       |       |   |    |   |   |          |     |     |
|----|---------------------------------------------------------------------|-------------|-------|---------|----|----|----|--------|---------------------|--------|------|-------|-------|---|----|---|---|----------|-----|-----|
| 41 | Triosephosphate isomerase                                           | TPIS_MOUSE  | 26694 | 100.00% | 16 | 23 | 47 | 58.20% | EAGITEK             | 95.00% | 1.51 | 0.152 | 0.678 | 0 | 1  | 0 | 2 | 747.389  | 136 | 142 |
| 41 | Triosephosphate isomerase                                           | TPIS_MOUSE  | 26694 | 100.00% | 16 | 23 | 47 | 58.20% | VVFQTK              | 95.00% | 1.66 | 0.255 | 1.92  | 1 | 2  | 0 | 2 | 850.4675 | 143 | 149 |
| 41 | Triosephosphate isomerase                                           | TPIS_MOUSE  | 26694 | 100.00% | 16 | 23 | 47 | 58.20% | VIADNVK             | 95.00% | 1.7  | 0.293 | 0.959 | 1 | 1  | 0 | 2 | 758.4413 | 150 | 156 |
| 41 | Triosephosphate isomerase                                           | TPIS_MOUSE  | 26694 | 100.00% | 16 | 23 | 47 | 58.20% | VIADNVKDWK          | 95.00% | 3.31 | 0.592 | 3.22  | 0 | 3  | 1 | 2 | 1,274.67 | 150 | 160 |
| 41 | Triosephosphate isomerase                                           | TPIS_MOUSE  | 26694 | 100.00% | 16 | 23 | 47 | 58.20% | VVLAYEPVWAIQTGK     | 95.00% | 2.86 | 0.502 | 5.06  | 0 | 1  | 0 | 2 | 1,602.89 | 161 | 175 |
| 41 | Triosephosphate isomerase                                           | TPIS_MOUSE  | 26694 | 100.00% | 16 | 23 | 47 | 58.20% | TATPQQAQEVHEK       | 95.00% | 2.67 | 0.405 | 0     | 0 | 2  | 3 | 2 | 1,466.72 | 176 | 188 |
| 41 | Triosephosphate isomerase                                           | TPIS_MOUSE  | 26694 | 100.00% | 16 | 23 | 47 | 58.20% | SNVNDGVAQSTR        | 95.00% | 3.92 | 0.55  | 4.8   | 0 | 1  | 0 | 2 | 1,247.60 | 195 | 206 |
| 41 | Triosephosphate isomerase                                           | TPIS_MOUSE  | 26694 | 100.00% | 16 | 23 | 47 | 58.20% | IYGGSVTGTATCK       | 95.00% | 4.21 | 0.641 | 1.6   | 0 | 2  | 0 | 2 | 1,326.67 | 207 | 219 |
| 42 | Triosephosphate isomerase                                           | TPIS_MOUSE  | 26694 | 100.00% | 12 | 17 | 35 | 51.80% | FFVGGNWK            | 95.00% | 1.7  | 0.332 | 1.21  | 0 | 1  | 0 | 2 | 954.4838 | 7   | 14  |
| 42 | Triosephosphate isomerase                                           | TPIS_MOUSE  | 26694 | 100.00% | 12 | 17 | 35 | 51.80% | IAVAAGQNCYK         | 95.00% | 3.11 | 0.433 | 1.96  | 2 | 5  | 0 | 2 | 1,137.57 | 60  | 69  |
| 42 | Triosephosphate isomerase                                           | TPIS_MOUSE  | 26694 | 100.00% | 12 | 17 | 35 | 51.80% | VNTGAFTEISPGMIK     | 95.00% | 2.14 | 0.477 | 1.28  | 0 | 1  | 0 | 2 | 1,637.82 | 70  | 85  |
| 42 | Triosephosphate isomerase                                           | TPIS_MOUSE  | 26694 | 100.00% | 12 | 17 | 35 | 51.80% | HVFGSEDELIGQK       | 95.00% | 3.51 | 0.545 | 4.16  | 0 | 3  | 2 | 2 | 1,458.72 | 101 | 113 |
| 42 | Triosephosphate isomerase                                           | TPIS_MOUSE  | 26694 | 100.00% | 12 | 17 | 35 | 51.80% | LDEREAGITEK         | 95.00% | 2.15 | 0.415 | 1.24  | 0 | 0  | 1 | 2 | 1,260.64 | 132 | 142 |
| 42 | Triosephosphate isomerase                                           | TPIS_MOUSE  | 26694 | 100.00% | 12 | 17 | 35 | 51.80% | VVFQTK              | 95.00% | 2.13 | 0.22  | 0     | 1 | 2  | 0 | 2 | 850.4675 | 143 | 149 |
| 42 | Triosephosphate isomerase                                           | TPIS_MOUSE  | 26694 | 100.00% | 12 | 17 | 35 | 51.80% | VIADNVK             | 95.00% | 1.61 | 0.278 | 1.42  | 0 | 1  | 0 | 2 | 758.4413 | 150 | 156 |
| 42 | Triosephosphate isomerase                                           | TPIS_MOUSE  | 26694 | 100.00% | 12 | 17 | 35 | 51.80% | VIADNVKDWK          | 95.00% | 3.14 | 0.486 | 1.66  | 0 | 2  | 1 | 2 | 1,274.67 | 150 | 160 |
| 42 | Triosephosphate isomerase                                           | TPIS_MOUSE  | 26694 | 100.00% | 12 | 17 | 35 | 51.80% | VVLAYEPVWAIQTGK     | 95.00% | 3.29 | 0.523 | 5.07  | 0 | 1  | 0 | 2 | 1,602.89 | 161 | 175 |
| 42 | Triosephosphate isomerase                                           | TPIS_MOUSE  | 26694 | 100.00% | 12 | 17 | 35 | 51.80% | TATPQQAQEVHEK       | 95.00% | 2.28 | 0.353 | 3.38  | 0 | 2  | 3 | 2 | 1,466.72 | 176 | 188 |
| 42 | Triosephosphate isomerase                                           | TPIS_MOUSE  | 26694 | 100.00% | 12 | 17 | 35 | 51.80% | SNVNDGVAQSTR        | 95.00% | 3.77 | 0.591 | 6.08  | 0 | 4  | 0 | 2 | 1,247.60 | 195 | 206 |
| 42 | Triosephosphate isomerase                                           | TPIS_MOUSE  | 26694 | 100.00% | 12 | 17 | 35 | 51.80% | IYGGSVTGTATCK       | 95.00% | 4.14 | 0.643 | 1.35  | 0 | 3  | 0 | 2 | 1,326.67 | 207 | 219 |
| 43 | Myosin regulatory light chain 2, ventricular/cardiac muscle isoform | MLRV_MOUSE  | 18847 | 100.00% | 11 | 17 | 55 | 46.40% | EAFITMDQNR          | 95.00% | 2.91 | 0.547 | 1.49  | 0 | 4  | 0 | 2 | 1,240.56 | 31  | 40  |
| 43 | Myosin regulatory light chain 2, ventricular/cardiac muscle isoform | MLRV_MOUSE  | 18847 | 100.00% | 11 | 17 | 55 | 46.40% | DGFIDK              | 95.00% | 2.13 | 0.201 | 0     | 1 | 2  | 0 | 2 | 694.3414 | 41  | 46  |
| 43 | Myosin regulatory light chain 2, ventricular/cardiac muscle isoform | MLRV_MOUSE  | 18847 | 100.00% | 11 | 17 | 55 | 46.40% | DGFIDKNLDR          | 95.00% | 2.81 | 0.358 | 0.854 | 0 | 2  | 3 | 2 | 1,192.60 | 41  | 50  |
| 43 | Myosin regulatory light chain 2, ventricular/cardiac muscle isoform | MLRV_MOUSE  | 18847 | 100.00% | 11 | 17 | 55 | 46.40% | DTFAALGR            | 95.00% | 2.82 | 0.44  | 1     | 2 | 6  | 0 | 2 | 850.4424 | 51  | 58  |
| 43 | Myosin regulatory light chain 2, ventricular/cardiac muscle isoform | MLRV_MOUSE  | 18847 | 100.00% | 11 | 17 | 55 | 46.40% | NEEDIMIK            | 95.00% | 2.67 | 0.235 | 0     | 0 | 2  | 0 | 2 | 1,136.51 | 63  | 71  |
| 43 | Myosin regulatory light chain 2, ventricular/cardiac muscle isoform | MLRV_MOUSE  | 18847 | 100.00% | 11 | 17 | 55 | 46.40% | LKGADPEETILNFAK     | 95.00% | 3.85 | 0.523 | 1.66  | 0 | 1  | 4 | 2 | 1,645.88 | 90  | 104 |
| 43 | Myosin regulatory light chain 2, ventricular/cardiac muscle isoform | MLRV_MOUSE  | 18847 | 100.00% | 11 | 17 | 55 | 46.40% | GADPEETILNFAK       | 95.00% | 3.55 | 0.355 | 3.28  | 1 | 5  | 0 | 2 | 1,404.70 | 92  | 104 |
| 43 | Myosin regulatory light chain 2, ventricular/cardiac muscle isoform | MLRV_MOUSE  | 18847 | 100.00% | 11 | 17 | 55 | 46.40% | VFDPEKG             | 95.00% | 1.97 | 0.403 | 0     | 0 | 14 | 0 | 2 | 791.3941 | 105 | 111 |
| 43 | Myosin regulatory light chain 2, ventricular/cardiac muscle isoform | MLRV_MOUSE  | 18847 | 100.00% | 11 | 17 | 55 | 46.40% | ADYVR               | 95.00% | 1.84 | 0.259 | 1.13  | 0 | 2  | 0 | 2 | 623.3153 | 116 | 120 |
| 43 | Myosin regulatory light chain 2, ventricular/cardiac muscle isoform | MLRV_MOUSE  | 18847 | 100.00% | 11 | 17 | 55 | 46.40% | NLVHIITHGEEK        | 95.00% | 2.3  | 0.366 | 0     | 0 | 0  | 2 | 2 | 1,389.75 | 154 | 165 |
| 43 | Myosin regulatory light chain 2, ventricular/cardiac muscle isoform | MLRV_MOUSE  | 18847 | 100.00% | 11 | 17 | 55 | 46.40% | NLVHIITHGEEKD       | 95.00% | 2.85 | 0.432 | 1.8   | 0 | 1  | 3 | 2 | 1,504.78 | 154 | 166 |
| 44 | Peroxiredoxin-2                                                     | PRDX2_MOUSE | 21761 | 100.00% | 6  | 7  | 15 | 24.70% | LSDYR               | 95.00% | 1.62 | 0.145 | 0     | 0 | 1  | 0 | 2 | 653.3259 | 30  | 34  |
| 44 | Peroxiredoxin-2                                                     | PRDX2_MOUSE | 21761 | 100.00% | 6  | 7  | 15 | 24.70% | SLSQNYGVLK          | 95.00% | 2.45 | 0.276 | 2.52  | 1 | 4  | 0 | 2 | 1,108.60 | 110 | 119 |
| 44 | Peroxiredoxin-2                                                     | PRDX2_MOUSE | 21761 | 100.00% | 6  | 7  | 15 | 24.70% | NDEGIAYR            | 95.00% | 2.74 | 0.472 | 3.07  | 0 | 4  | 0 | 2 | 937.438  | 120 | 127 |
| 44 | Peroxiredoxin-2                                                     | PRDX2_MOUSE | 21761 | 100.00% | 6  | 7  | 15 | 24.70% | GLFIIDAK            | 95.00% | 2.62 | 0.225 | 2.77  | 0 | 2  | 0 | 2 | 876.5197 | 128 | 135 |
| 44 | Peroxiredoxin-2                                                     | PRDX2_MOUSE | 21761 | 100.00% | 6  | 7  | 15 | 24.70% | QITVNDLPVGR         | 95.00% | 2.56 | 0.311 | 2.59  | 0 | 1  | 0 | 2 | 1,211.68 | 140 | 150 |
| 44 | Peroxiredoxin-2                                                     | PRDX2_MOUSE | 21761 | 100.00% | 6  | 7  | 15 | 24.70% | SVDEALR             | 95.00% | 1.83 | 0.075 | 0.886 | 0 | 2  | 0 | 2 | 789.4107 | 151 | 157 |
| 45 | Cysteine and glycine-rich protein 3                                 | CSR3_MOUSE  | 20876 | 100.00% | 3  | 3  | 5  | 24.70% | TYVHAEIQCNGR        | 95.00% | 1.88 | 0.322 | 1.85  | 0 | 1  | 0 | 2 | 1,576.72 | 16  | 28  |
| 45 | Cysteine and glycine-rich protein 3                                 | CSR3_MOUSE  | 20876 | 100.00% | 3  | 3  | 5  | 24.70% | ALDSTVAAHSEIYCK     | 95.00% | 3.5  | 0.589 | 2.8   | 0 | 0  | 2 | 2 | 1,894.89 | 43  | 59  |
| 45 | Cysteine and glycine-rich protein 3                                 | CSR3_MOUSE  | 20876 | 100.00% | 3  | 3  | 5  | 24.70% | NFGPTGIGFGLTQVEK    | 95.00% | 3.56 | 0.582 | 1.96  | 0 | 2  | 0 | 2 | 1,849.95 | 175 | 192 |
| 45 | NADH dehydrogenase [ubiquinone] 1 beta subcomplex subunit 10        | NDUBA_MOUSE | 21006 | 100.00% | 8  | 8  | 17 | 40.30% | TPAPSPQTSPLNPVTLTK  | 95.00% | 4.84 | 0.704 | 7.66  | 0 | 3  | 0 | 2 | 2,026.09 | 17  | 35  |
| 45 | NADH dehydrogenase [ubiquinone] 1 beta subcomplex subunit 10        | NDUBA_MOUSE | 21006 | 100.00% | 8  | 8  | 17 | 40.30% | ADVLVLDWVPTLVR      | 95.00% | 3.51 | 0.529 | 3.04  | 0 | 2  | 0 | 2 | 1,645.90 | 36  | 49  |
| 45 | NADH dehydrogenase [ubiquinone] 1 beta subcomplex subunit 10        | NDUBA_MOUSE | 21006 | 100.00% | 8  | 8  | 17 | 40.30% | TYVHHR              | 95.00% | 1.56 | 0.172 | 1.34  | 0 | 1  | 0 | 2 | 902.416  | 61  | 66  |
| 45 | NADH dehydrogenase [ubiquinone] 1 beta subcomplex subunit 10        | NDUBA_MOUSE | 21006 | 100.00% | 8  | 8  | 17 | 40.30% | RVPDTECK            | 95.00% | 2.15 | 0.451 | 1.46  | 0 | 3  | 0 | 2 | 1,117.57 | 70  | 78  |
| 45 | NADH dehydrogenase [ubiquinone] 1 beta subcomplex subunit 10        | NDUBA_MOUSE | 21006 | 100.00% | 8  | 8  | 17 | 40.30% | VPDITECK            | 95.00% | 2.33 | 0.332 | 3.55  | 0 | 2  | 0 | 2 | 961.4666 | 71  | 78  |
| 45 | NADH dehydrogenase [ubiquinone] 1 beta subcomplex subunit 10        | NDUBA_MOUSE | 21006 | 100.00% | 8  | 8  | 17 | 40.30% | ELEQFTK             | 95.00% | 1.78 | 0.154 | 1.85  | 0 | 1  | 0 | 2 | 894.4574 | 128 | 134 |
| 45 | NADH dehydrogenase [ubiquinone] 1 beta subcomplex subunit 10        | NDUBA_MOUSE | 21006 | 100.00% | 8  | 8  | 17 | 40.30% | AYQDRYLRLGAYYSAR    | 95.00% | 3.21 | 0.536 | 1.62  | 0 | 0  | 1 | 2 | 1,924.92 | 138 | 153 |
| 45 | NADH dehydrogenase [ubiquinone] 1 beta subcomplex subunit 10        | NDUBA_MOUSE | 21006 | 100.00% | 8  | 8  | 17 | 40.30% | YLDLGAAYSR          | 95.00% | 3.12 | 0.585 | 3.7   | 0 | 4  | 0 | 2 | 1,291.63 | 143 | 153 |
| 46 | Cysteine and glycine-rich protein 3                                 | CSR3_MOUSE  | 20876 | 100.00% | 6  | 9  | 13 | 39.20% | TYVHAEIQCNGR        | 95.00% | 3.4  | 0.434 | 0     | 0 | 2  | 2 | 2 | 1,576.72 | 16  | 28  |
| 46 | Cysteine and glycine-rich protein 3                                 | CSR3_MOUSE  | 20876 | 100.00% | 6  | 9  | 13 | 39.20% | ALDSTVAAHSEIYCK     | 95.00% | 3.19 | 0.58  | 5.26  | 0 | 1  | 2 | 2 | 1,894.89 | 43  | 59  |
| 46 | Cysteine and glycine-rich protein 3                                 | CSR3_MOUSE  | 20876 | 100.00% | 6  | 9  | 13 | 39.20% | FGESEKPR            | 95.00% | 1.84 | 0.294 | 0     | 0 | 0  | 1 | 2 | 1,109.51 | 114 | 122 |
| 46 | Cysteine and glycine-rich protein 3                                 | CSR3_MOUSE  | 20876 | 100.00% | 6  | 9  | 13 | 39.20% | SLESTNVTDKDGELYCK   | 95.00% | 2.49 | 0.267 | 1.44  | 0 | 0  | 1 | 2 | 1,958.90 | 153 | 169 |
| 46 | Cysteine and glycine-rich protein 3                                 | CSR3_MOUSE  | 20876 | 100.00% | 6  | 9  | 13 | 39.20% | NFGPTGIGFGLTQVEK    | 95.00% | 4.06 | 0.472 | 3.74  | 0 | 1  | 0 | 2 | 1,849.95 | 175 | 192 |
| 46 | Cysteine and glycine-rich protein 3                                 | CSR3_MOUSE  | 20876 | 100.00% | 6  | 9  | 13 | 39.20% | NFGPTGIGFGLTQVEKKE  | 95.00% | 3.67 | 0.511 | 1.62  | 0 | 2  | 1 | 2 | 2,107.08 | 175 | 194 |
| 46 | Glutathione S-transferase P 1                                       | GSTP1_MOUSE | 23592 | 100.00% | 5  | 7  | 13 | 37.60% | FEDGDLTLYSNAILR     | 95.00% | 4.56 | 0.649 | 3.18  | 0 | 3  | 0 | 2 | 1,854.92 | 56  | 71  |
| 46 | Glutathione S-transferase P 1                                       | GSTP1_MOUSE | 23592 | 100.00% | 5  | 7  | 13 | 37.60% | SLGLYK              | 95.00% | 1.6  | 0.257 | 0     | 1 | 0  | 0 | 2 | 737.4199 | 76  | 82  |
| 46 | Glutathione S-transferase P 1                                       | GSTP1_MOUSE | 23592 | 100.00% | 5  | 7  | 13 | 37.60% | YVTLIYTYENKNDYVK    | 95.00% | 3.13 | 0.555 | 1.96  | 0 | 2  | 1 | 2 | 2,197.08 | 104 | 121 |
| 46 | Glutathione S-transferase P 1                                       | GSTP1_MOUSE | 23592 | 100.00% | 5  | 7  | 13 | 37.60% | ALPGLHFPFETLLSQNGGK | 95.00% | 3.8  | 0.456 | 3.49  | 0 | 1  | 3 | 2 | 2,135.16 | 122 | 141 |
| 46 | Glutathione S-transferase P 1                                       | GSTP1_MOUSE | 23592 | 100.00% | 5  | 7  | 13 | 37.60% | AFLSSPEHVRPNINGNK   | 95.00% | 1.98 | 0.294 | 0     | 0 | 0  | 2 | 2 | 1,937.00 | 192 | 209 |
| 47 | Alpha-crystallin B chain                                            | CRYAB_MOUSE | 20051 | 100.00% | 10 | 13 | 30 | 45.10% | RPFPPHSPSR          | 95.00% | 2.82 | 0.292 | 0     | 0 | 0  | 3 | 2 | 1,374.71 | 12  | 22  |
| 47 | Alpha-crystallin B chain                                            | CRYAB_MOUSE | 20051 | 100.00% | 10 | 13 | 30 | 45.10% | APSWIDTGLSEMR       | 95.00% | 3.31 | 0.54  | 2.74  | 0 | 1  | 0 | 2 | 1,478.70 | 57  | 69  |
| 47 | Alpha-crystallin B chain                                            | CRYAB_MOUSE | 20051 | 100.00% | 10 | 13 | 30 | 45.10% | HFSPEELK            | 95.00% | 2.36 | 0.388 | 0     | 1 | 5  | 0 | 2 | 986.4948 | 83  | 90  |
| 47 | Alpha-crystallin B chain                                            | CRYAB_MOUSE | 20051 | 100.00% | 10 | 13 | 30 | 45.10% | HFSPEELVKK          | 95.00% | 3.12 | 0.236 | 2.74  | 0 | 0  | 1 | 2 | 1,213.66 | 83  | 92  |
| 47 | Alpha-crystallin B chain                                            | CRYAB_MOUSE | 20051 | 100.00% | 10 | 13 | 30 | 45.10% | VLGDVIEVHGK         | 95.00% | 3.47 | 0.538 | 3.33  | 0 | 4  | 3 | 2 | 1,165.66 | 93  | 103 |
| 47 | Alpha-crystallin B chain                                            | CRYAB_MOUSE | 20051 | 100.00% | 10 | 13 | 30 | 45.10% | QDEHGFISR           | 95.00% | 2.14 | 0.237 | 0.854 | 0 | 4  | 0 | 2 | 1,088.51 | 108 | 116 |
| 47 | Alpha-crystallin B chain                                            | CRYAB_MOUSE | 20051 | 100.00% | 10 | 13 | 30 | 45.10% | KQVSGPER            | 95.00% | 1.7  | 0.147 | 0     | 0 | 1  | 0 |   |          |     |     |

|    |                                             |             |       |         |    |    |    |        |                   |        |      |       |      |   |   |   |   |          |     |     |
|----|---------------------------------------------|-------------|-------|---------|----|----|----|--------|-------------------|--------|------|-------|------|---|---|---|---|----------|-----|-----|
| 48 | Peroxiredoxin-1                             | PRDX1_MOUSE | 22160 | 100.00% | 11 | 15 | 26 | 42.20% | QITINDLPVGR       | 95.00% | 2.64 | 0.564 | 2.77 | 0 | 3 | 0 | 2 | 1,225.69 | 141 | 151 |
| 48 | Peroxiredoxin-1                             | PRDX1_MOUSE | 22160 | 100.00% | 11 | 15 | 26 | 42.20% | SVDEIIR           | 95.00% | 2.13 | 0.138 | 2.44 | 2 | 1 | 0 | 2 | 831.4577 | 152 | 158 |
| 48 | Peroxiredoxin-1                             | PRDX1_MOUSE | 22160 | 100.00% | 11 | 15 | 26 | 42.20% | LVQAFQFTDK        | 95.00% | 3.01 | 0.468 | 5.77 | 0 | 2 | 0 | 2 | 1,196.63 | 159 | 168 |
| 48 | Peroxiredoxin-1                             | PRDX1_MOUSE | 22160 | 100.00% | 11 | 15 | 26 | 42.20% | SKEYFSK           | 95.00% | 2.3  | 0.15  | 2.17 | 0 | 1 | 0 | 2 | 888.4467 | 191 | 197 |
| 49 | Adenylate kinase isoenzyme 4, mitochondrial | KAD4_MOUSE  | 25044 | 100.00% | 8  | 11 | 19 | 35.00% | AVILGPPGSGK       | 95.00% | 2.17 | 0.395 | 0    | 0 | 2 | 0 | 2 | 995.5892 | 8   | 18  |
| 49 | Adenylate kinase isoenzyme 4, mitochondrial | KAD4_MOUSE  | 25044 | 100.00% | 8  | 11 | 19 | 35.00% | AVILGPPGSGKGTVCER | 95.00% | 1.76 | 0.247 | 1.11 | 0 | 0 | 2 | 2 | 1,697.90 | 8   | 24  |
| 49 | Adenylate kinase isoenzyme 4, mitochondrial | KAD4_MOUSE  | 25044 | 100.00% | 8  | 11 | 19 | 35.00% | GLLVPDHVITR       | 95.00% | 2.41 | 0.337 | 0    | 0 | 1 | 2 | 2 | 1,219.72 | 61  | 71  |
| 49 | Adenylate kinase isoenzyme 4, mitochondrial | KAD4_MOUSE  | 25044 | 100.00% | 8  | 11 | 19 | 35.00% | SAQHWLLDGFPR      | 95.00% | 2.72 | 0.366 | 2    | 0 | 1 | 2 | 2 | 1,426.72 | 81  | 92  |
| 49 | Adenylate kinase isoenzyme 4, mitochondrial | KAD4_MOUSE  | 25044 | 100.00% | 8  | 11 | 19 | 35.00% | YKDAAKPVIELYK     | 95.00% | 3.01 | 0.521 | 1.85 | 0 | 0 | 2 | 2 | 1,537.86 | 174 | 186 |
| 49 | Adenylate kinase isoenzyme 4, mitochondrial | KAD4_MOUSE  | 25044 | 100.00% | 8  | 11 | 19 | 35.00% | DAAKPVIELYK       | 95.00% | 2.28 | 0.318 | 0    | 0 | 0 | 2 | 2 | 1,246.70 | 176 | 186 |
| 49 | Adenylate kinase isoenzyme 4, mitochondrial | KAD4_MOUSE  | 25044 | 100.00% | 8  | 11 | 19 | 35.00% | GVLHQFSGTETNR     | 95.00% | 2.59 | 0.463 | 1.96 | 0 | 1 | 2 | 2 | 1,445.71 | 189 | 201 |
| 49 | Adenylate kinase isoenzyme 4, mitochondrial | KAD4_MOUSE  | 25044 | 100.00% | 8  | 11 | 19 | 35.00% | IWPVYVTLFSNK      | 95.00% | 3.25 | 0.581 | 4.64 | 0 | 2 | 0 | 2 | 1,530.80 | 202 | 213 |

**Supplemental Table II. Overlap of significant protein and mRNA changes only**

| Protein identity                                                | Gene Symbol | Gene Name                                      | PROTEOMICS  |          | TRANSCRIPTOMICS |          |       |
|-----------------------------------------------------------------|-------------|------------------------------------------------|-------------|----------|-----------------|----------|-------|
|                                                                 |             |                                                | Fold change | P-value  | Fold change     | Bayes. p | FDR   |
| Adenylate kinase isoenzyme 4, mitochondrial                     | AK3L1       | Adenylate kinase 3, alpha-like 1               | 1.21        | 0.004    | 2.65            | 0.0001   | 0.019 |
| Short chain 3-hydroxyacyl-CoA dehydrogenase, mitochondrial      | HADHSC      | L-3_Hydroxyacyl-CoA dehydrogenase, short chain | -1.22       | 0.002    | -1.70           | 0.0118   | 0.277 |
| L-lactate dehydrogenase A                                       | LDHA        | Lactate dehydrogenase A                        | 1.29        | 7.80E-05 | 1.84            | 0.0061   | 0.198 |
| Methylcrotonoyl-CoA carboxylase alpha chain, mitochondrial      | MCCC1       | Methylcrotonyl-CoA carboxylase 1, alpha        | -1.23       | 0.0001   | -1.58           | 0.0215   | 0.354 |
| Succinyl-CoA:3-ketoacid-coenzyme A transferase 1, mitochondrial | OXCT1       | 3-Oxoacid CoA transferase 1                    | -1.32       | 0.001    | -1.59           | 0.0157   | 0.314 |
| Protein disulfide-isomerase                                     | P4HB        | Prolyl 4-Hydroxylase, beta                     | 1.32        | 0.001    | 1.53            | 0.0169   | 0.323 |
| Pyruvate kinase, isozyme M2                                     | PKM2        | Pyruvate kinase, isozyme M2                    | 1.54        | 7.30E-07 | 1.58            | 0.0102   | 0.258 |
| Triosephosphate isomerase                                       | TPI1        | Triosephosphate isomerase 1                    | 2.07        | 1.40E-08 | 1.80            | 0.0032   | 0.154 |
| Serotransferrin                                                 | TRF         | Transferrin                                    | 1.34        | 0.001    | 2.51            | 0.0338   | 0.421 |

### Supplemental Table III: Pathway identification using Metacore™

| Map (objects)                                                        | Mapobjects | COMBINED |         |         | TRANSCRIPTOMICS |         |         | PROTEOMICS |         |         | METABOLOMICS |         |         |
|----------------------------------------------------------------------|------------|----------|---------|---------|-----------------|---------|---------|------------|---------|---------|--------------|---------|---------|
|                                                                      |            | Rank     | p-Value | Objects | Rank            | p-Value | Objects | Rank       | p-Value | Objects | Rank         | p-Value | Objects |
| Transcription_Role of Akt in hypoxia induced HIF1 activation         | 29         | 1        | 1.4E-04 | 8       | 9               | 3.9E-02 | 4       | 7          | 1.1E-02 | 4       |              |         |         |
| Glycolysis and gluconeogenesis (short map)                           | 36         | 2        | 6.8E-04 | 9       | 14              | 7.6E-02 | 4       | 8          | 2.4E-02 | 4       | 38           | 4.0E-01 | 1       |
| Proline metabolism                                                   | 14         | 3        | 7.2E-04 | 5       | 22              | 1.3E-01 | 2       | 1          | 6.6E-04 | 4       |              |         |         |
| Fructose metabolism                                                  | 31         | 4        | 6.7E-03 | 8       | 3               | 1.1E-02 | 5       | 60         | 6.3E-01 | 1       | 16           | 1.6E-01 | 2       |
| Cell adhesion_Endothelial cell contacts by non-junctional mechanisms | 24         | 5        | 9.6E-03 | 5       | 1               | 3.6E-03 | 5       |            |         |         |              |         |         |
| Muscle contraction_Role of kappa-type opioid receptor in heart       | 16         | 6        | 1.1E-02 | 4       | 7               | 3.2E-02 | 3       | 33         | 4.0E-01 | 1       |              |         |         |
| Transport_Intracellular cholesterol transport in norm                | 47         | 7        | 1.5E-02 | 7       | 11              | 5.8E-02 | 5       | 35         | 4.4E-01 | 2       |              |         |         |
| Intracellular cholesterol transport in CF                            | 47         | 8        | 1.5E-02 | 7       | 12              | 5.8E-02 | 5       | 34         | 4.4E-01 | 2       |              |         |         |
| Immune response_MIF - the neuroendocrine-macrophage connector        | 27         | 9        | 1.6E-02 | 5       | 6               | 3.1E-02 | 4       | 50         | 5.8E-01 | 1       |              |         |         |
| Urea cycle                                                           | 27         | 10       | 1.6E-02 | 8       | 138             | 7.1E-01 | 1       | 3          | 8.6E-03 | 4       | 12           | 9.5E-02 | 3       |
| Glycolysis and gluconeogenesis p. 1                                  | 19         | 11       | 2.0E-02 | 6       | 2               | 8.9E-03 | 4       |            |         |         | 11           | 7.4E-02 | 2       |
| Transcription_P53 signaling pathway                                  | 32         | 12       | 3.2E-02 | 5       | 26              | 1.7E-01 | 3       | 26         | 2.6E-01 | 2       |              |         |         |
| Development_VEGF-family signaling                                    | 32         | 13       | 3.2E-02 | 5       | 4               | 1.3E-02 | 5       |            |         |         |              |         |         |
| Cell adhesion_Gap junctions                                          | 22         | 14       | 3.3E-02 | 4       | 44              | 2.6E-01 | 2       | 17         | 1.5E-01 | 2       |              |         |         |
| Leucine, isoleucine and valine metabolism                            | 13         | 15       | 3.4E-02 | 6       |                 |         |         | 2          | 6.5E-03 | 3       | 8            | 6.0E-02 | 3       |
| Butanoate metabolism                                                 | 24         | 16       | 4.3E-02 | 5       | 17              | 9.1E-02 | 3       | 18         | 1.7E-01 | 2       | 45           | 5.1E-01 | 1       |
| Cell adhesion_Chemokines and adhesion                                | 84         | 17       | 4.5E-02 | 9       | 8               | 3.3E-02 | 8       | 86         | 9.4E-01 | 1       |              |         |         |
| Glycolysis and gluconeogenesis p.3                                   | 15         | 18       | 4.9E-02 | 3       |                 |         |         | 5          | 1.0E-02 | 3       |              |         |         |
| Glutathione metabolism                                               | 36         | 19       | 5.0E-02 | 6       | 5               | 2.1E-02 | 5       |            |         |         | 41           | 4.5E-01 | 1       |
| Leucine, isoleucine and valine metabolism.p.2                        | 28         | 20       | 7.0E-02 | 4       | 141             | 7.3E-01 | 1       | 4          | 9.8E-03 | 4       |              |         |         |

p-Value: Metacore statistics for pathway identification, Objects: genes/proteins/metabolites identified in map

A

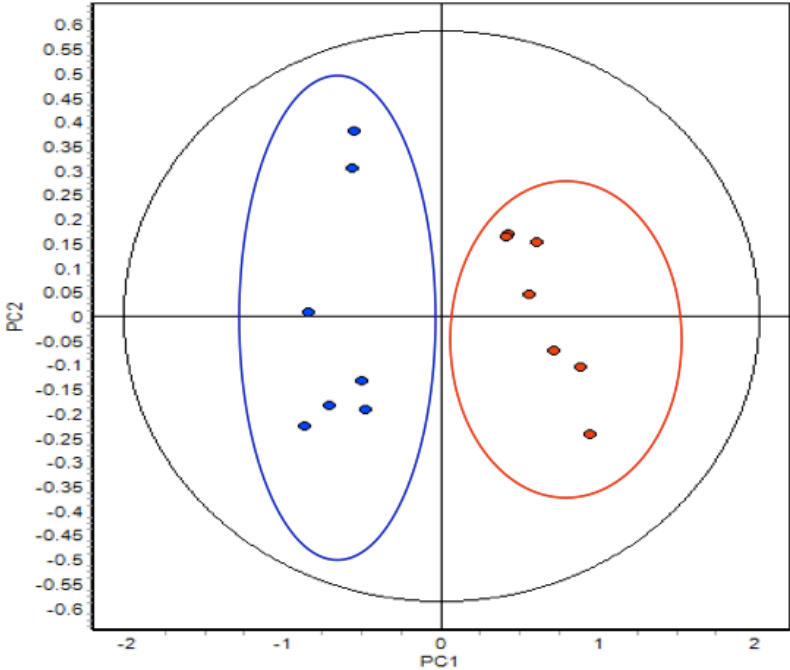

B

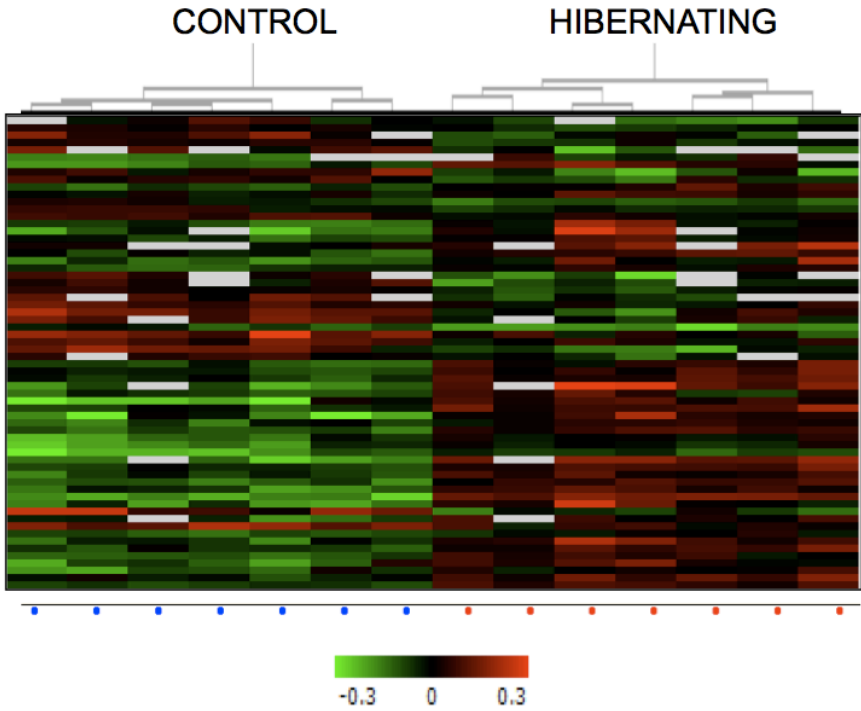

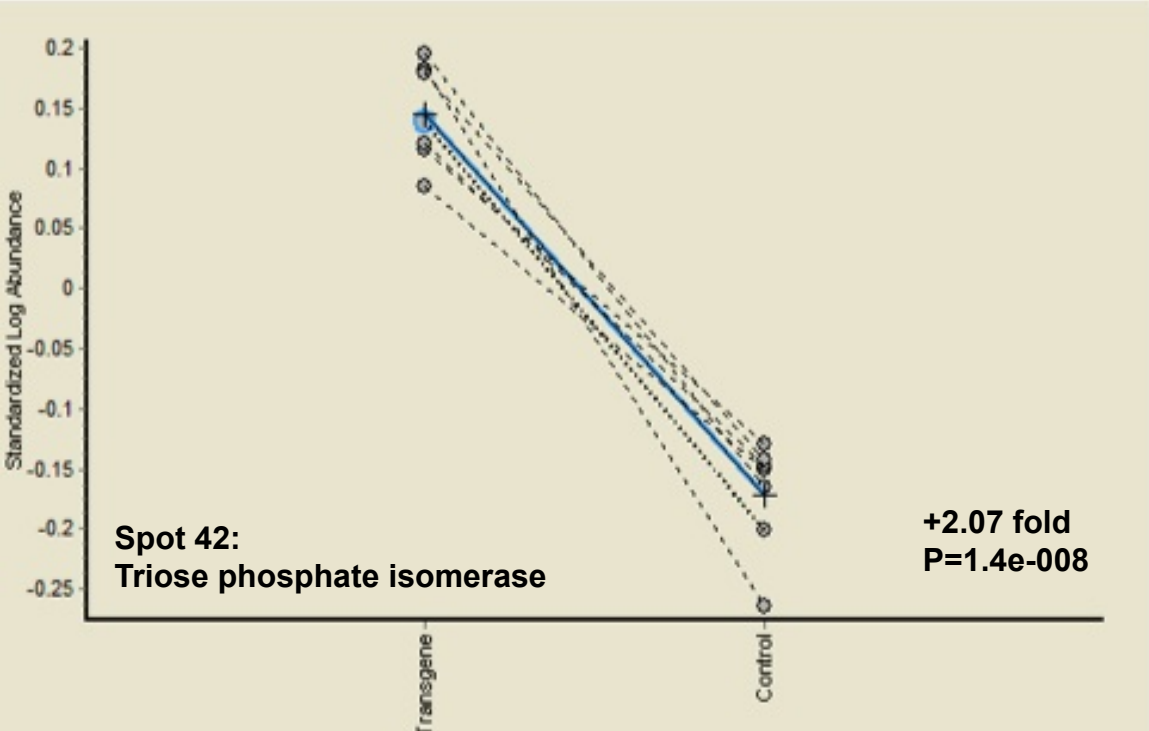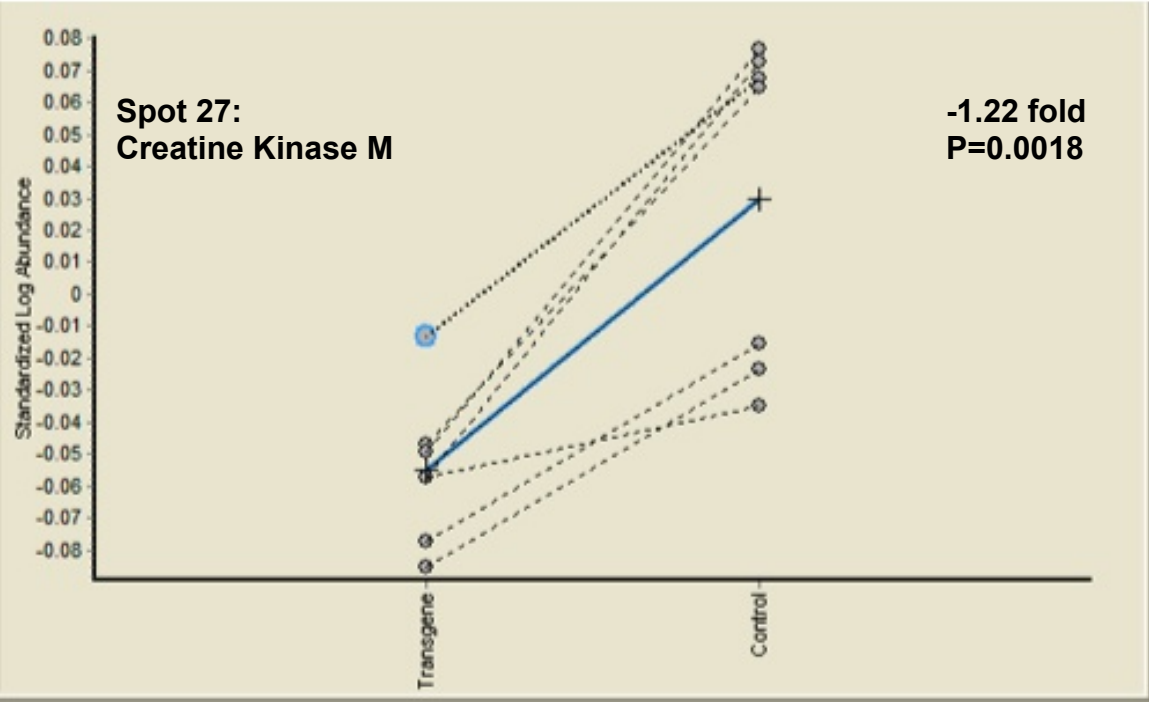

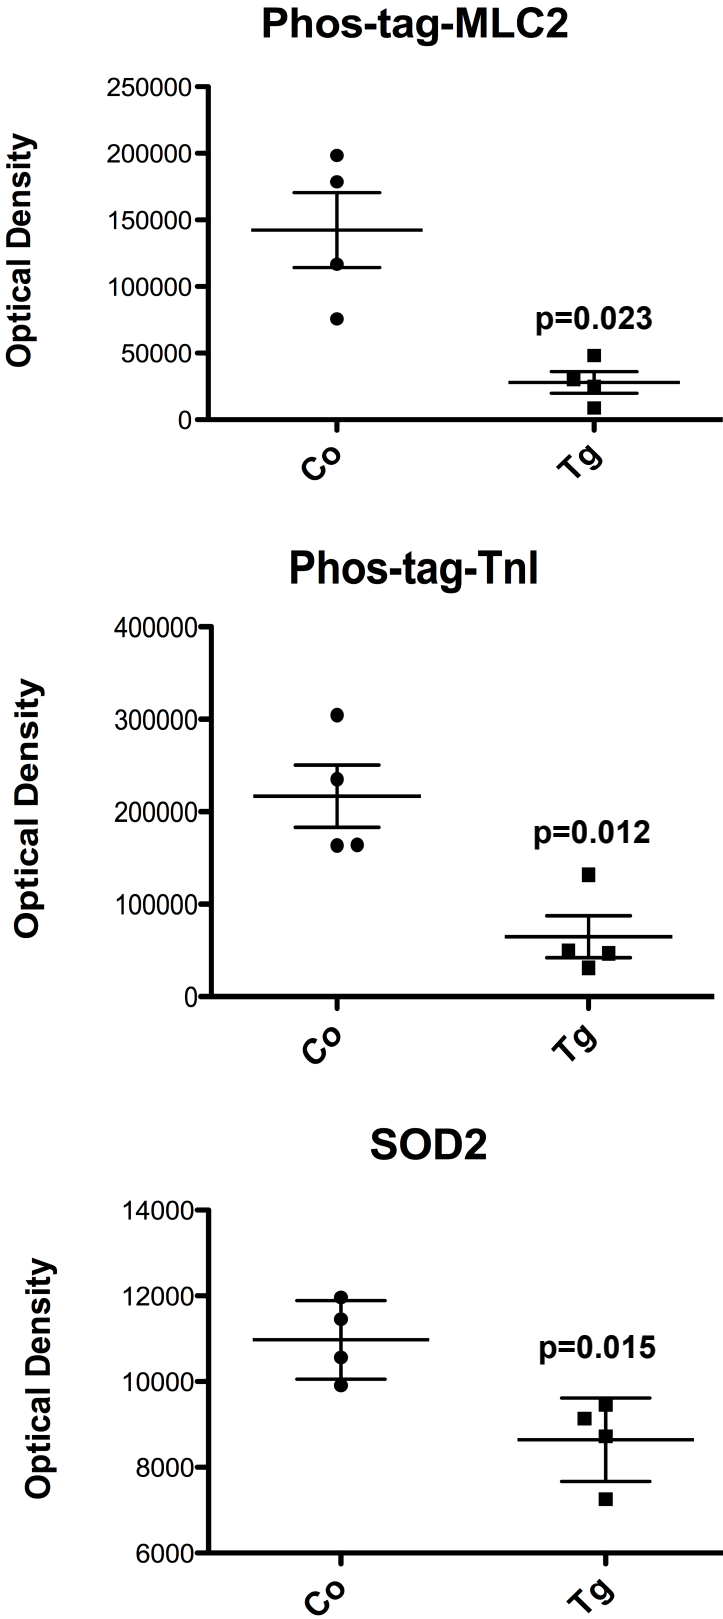



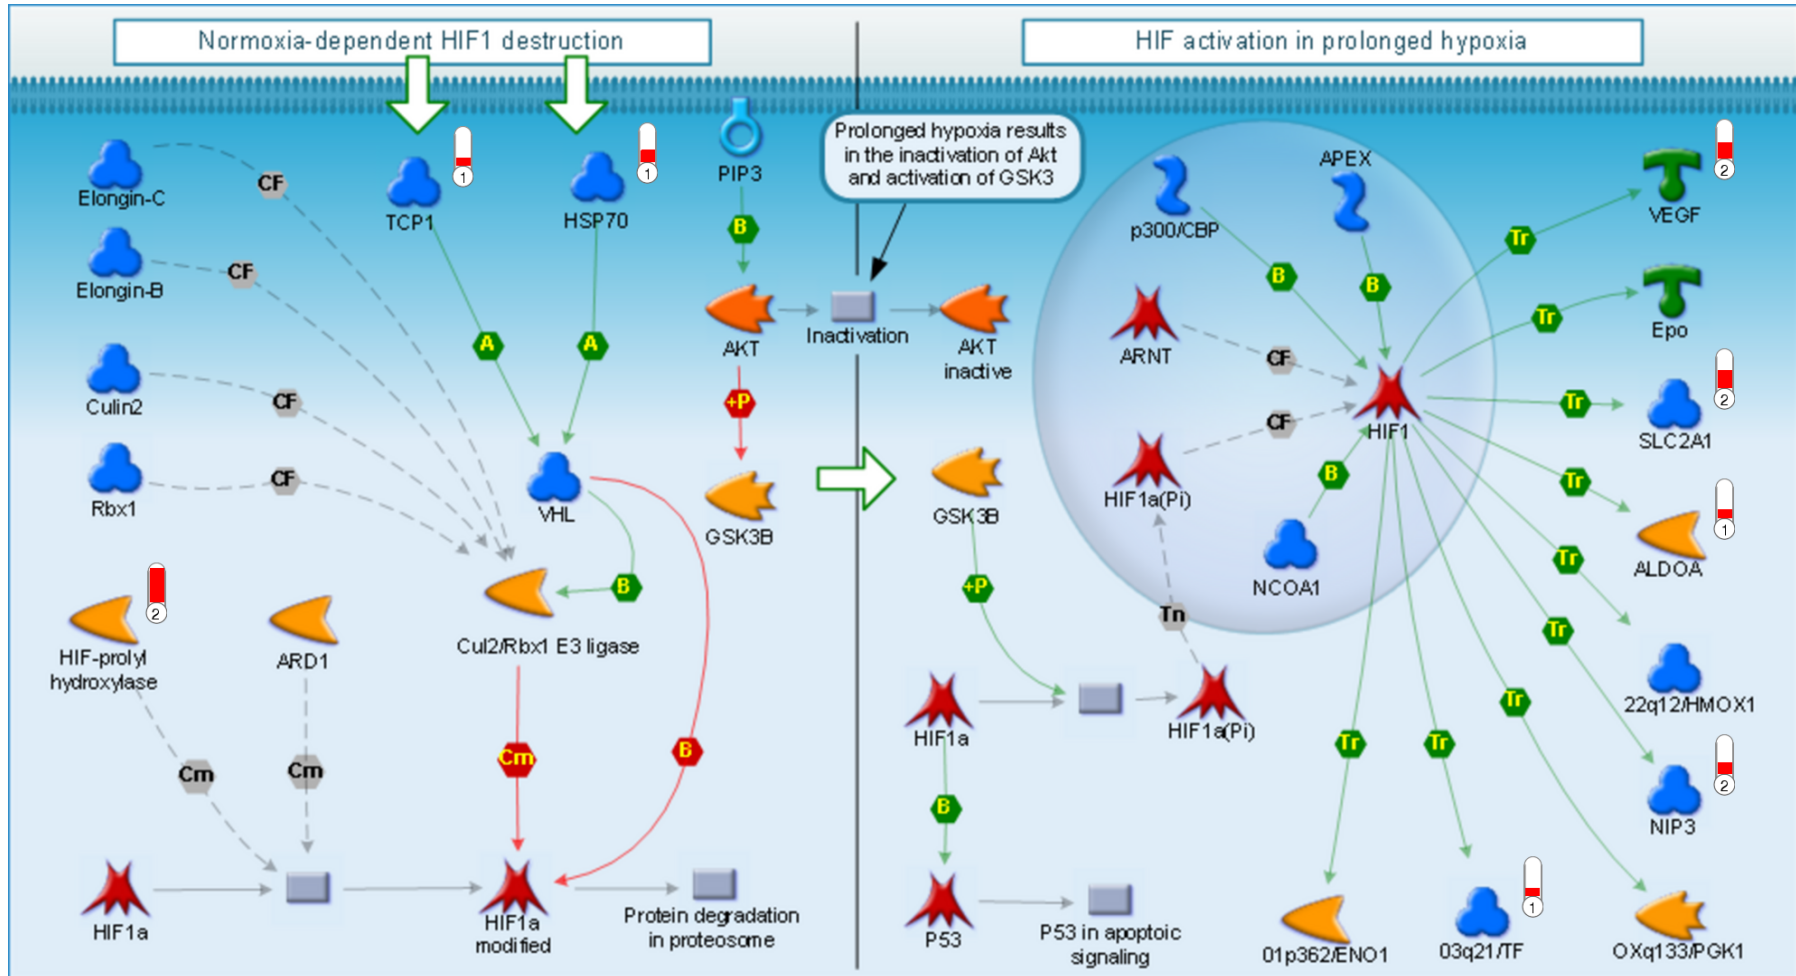

Supplement: mmc1.pdf [file mmc1.pdf]
